# Supplementary material for: Metagenomics reveals novel microbial signatures of farm exposures in house dust
Source: PubMed Central journal article supplement (PMC10321240; doi:10.3389/fmicb.2023.1202194), 2023-06-21

# Gender, Male (vs. Female)

2 Sig. DA taxa

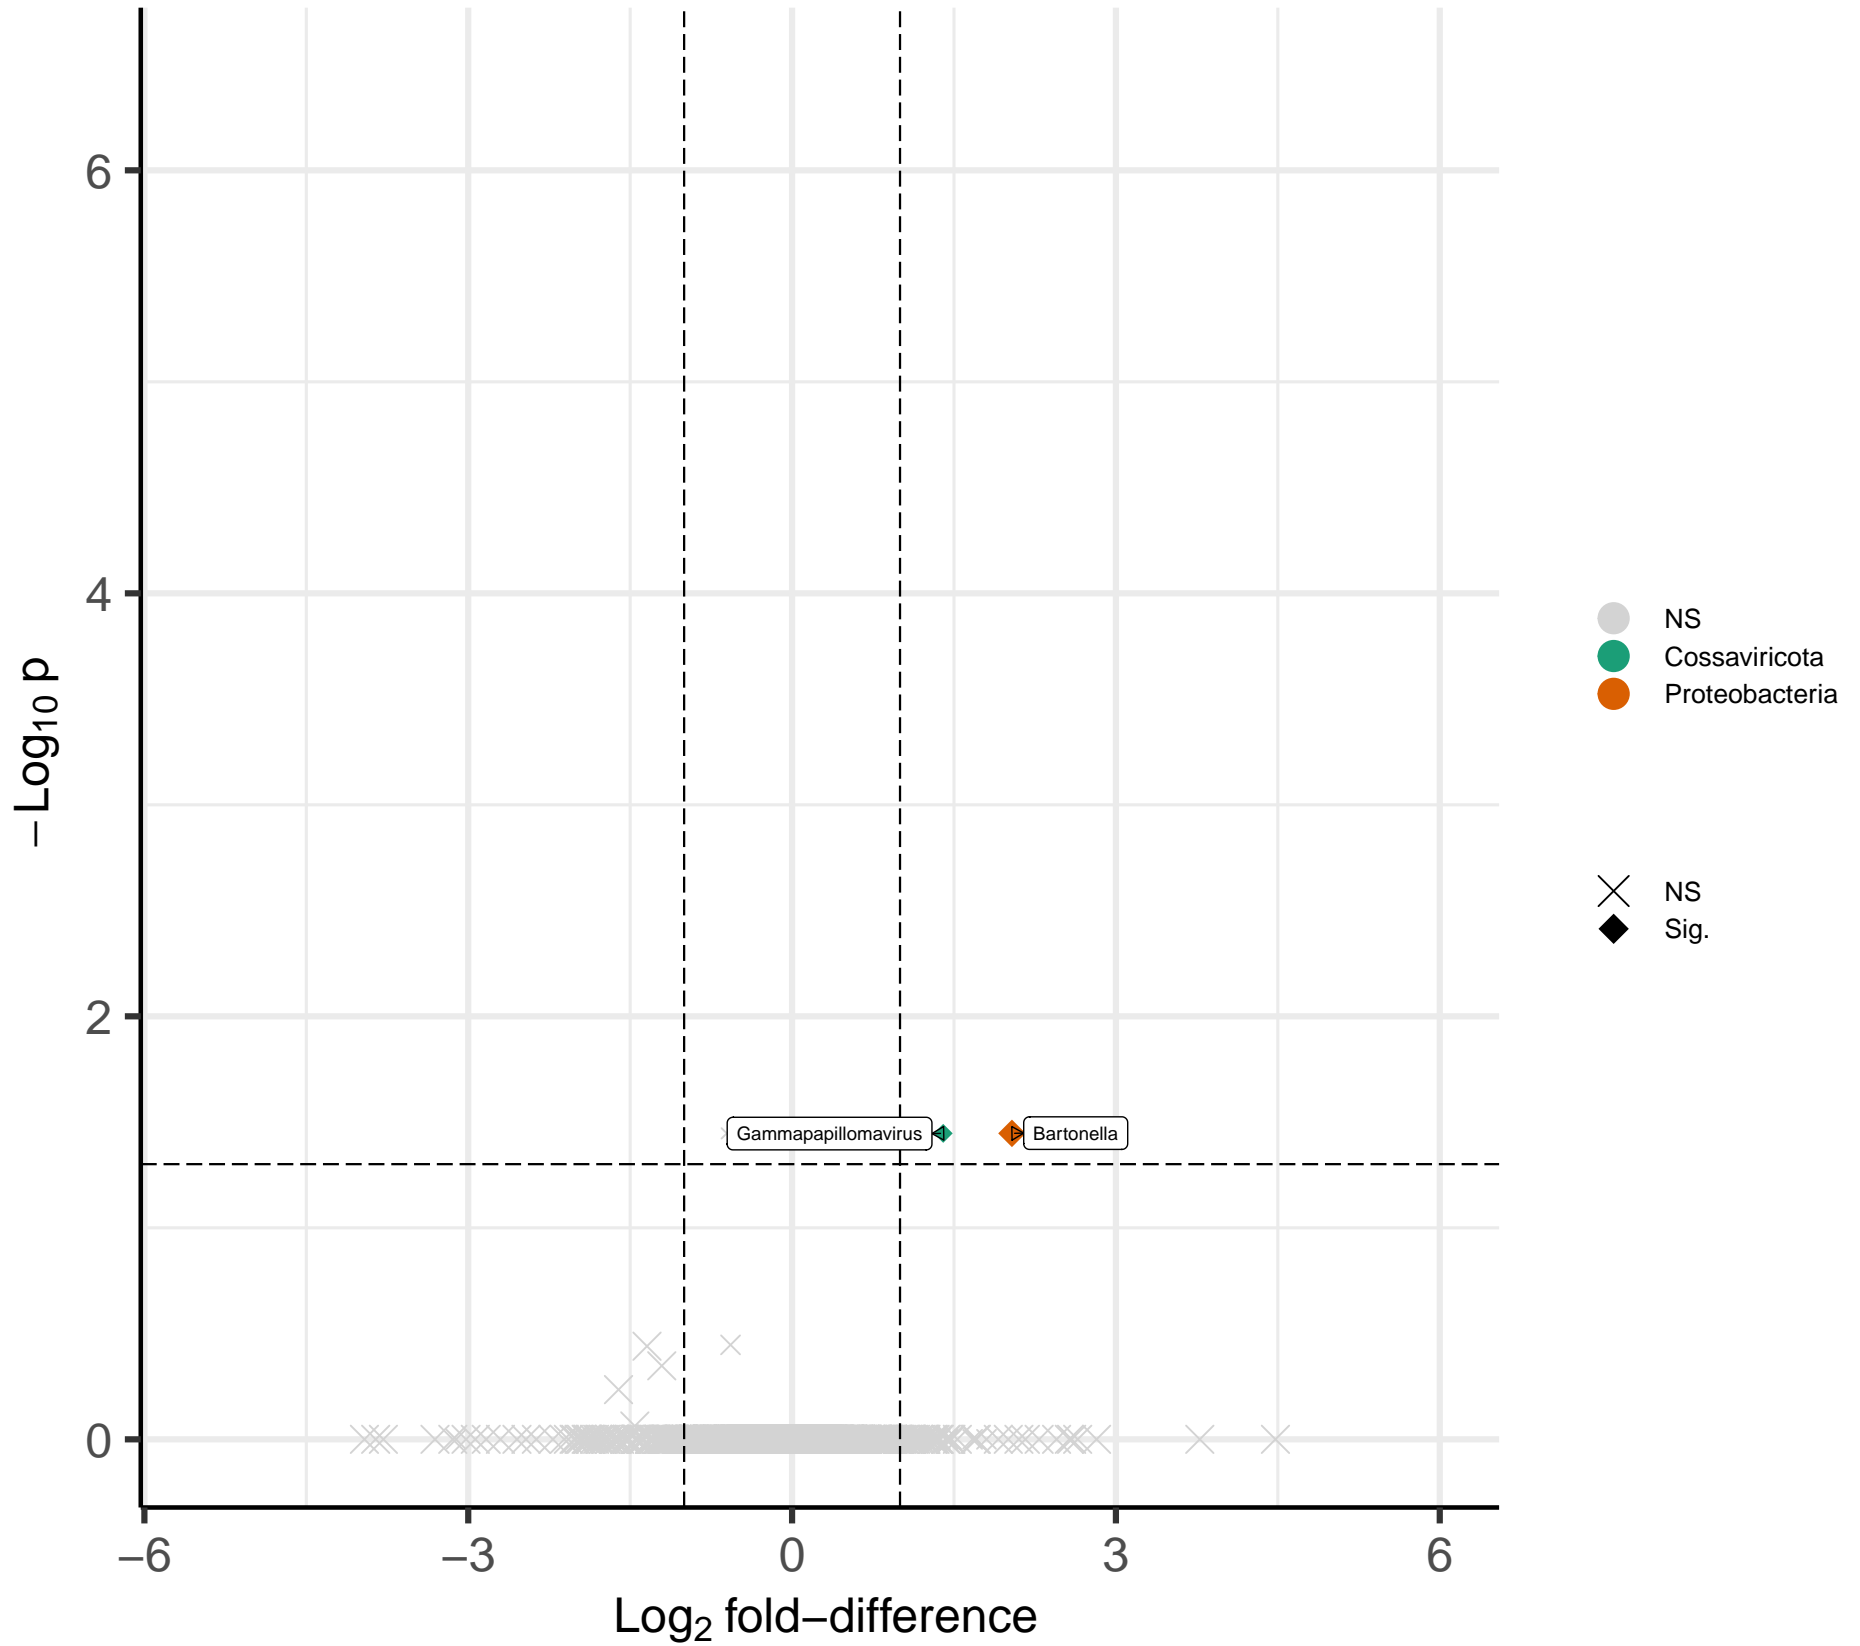



# Dogs (vs. no dogs)

39 Sig. DA taxa

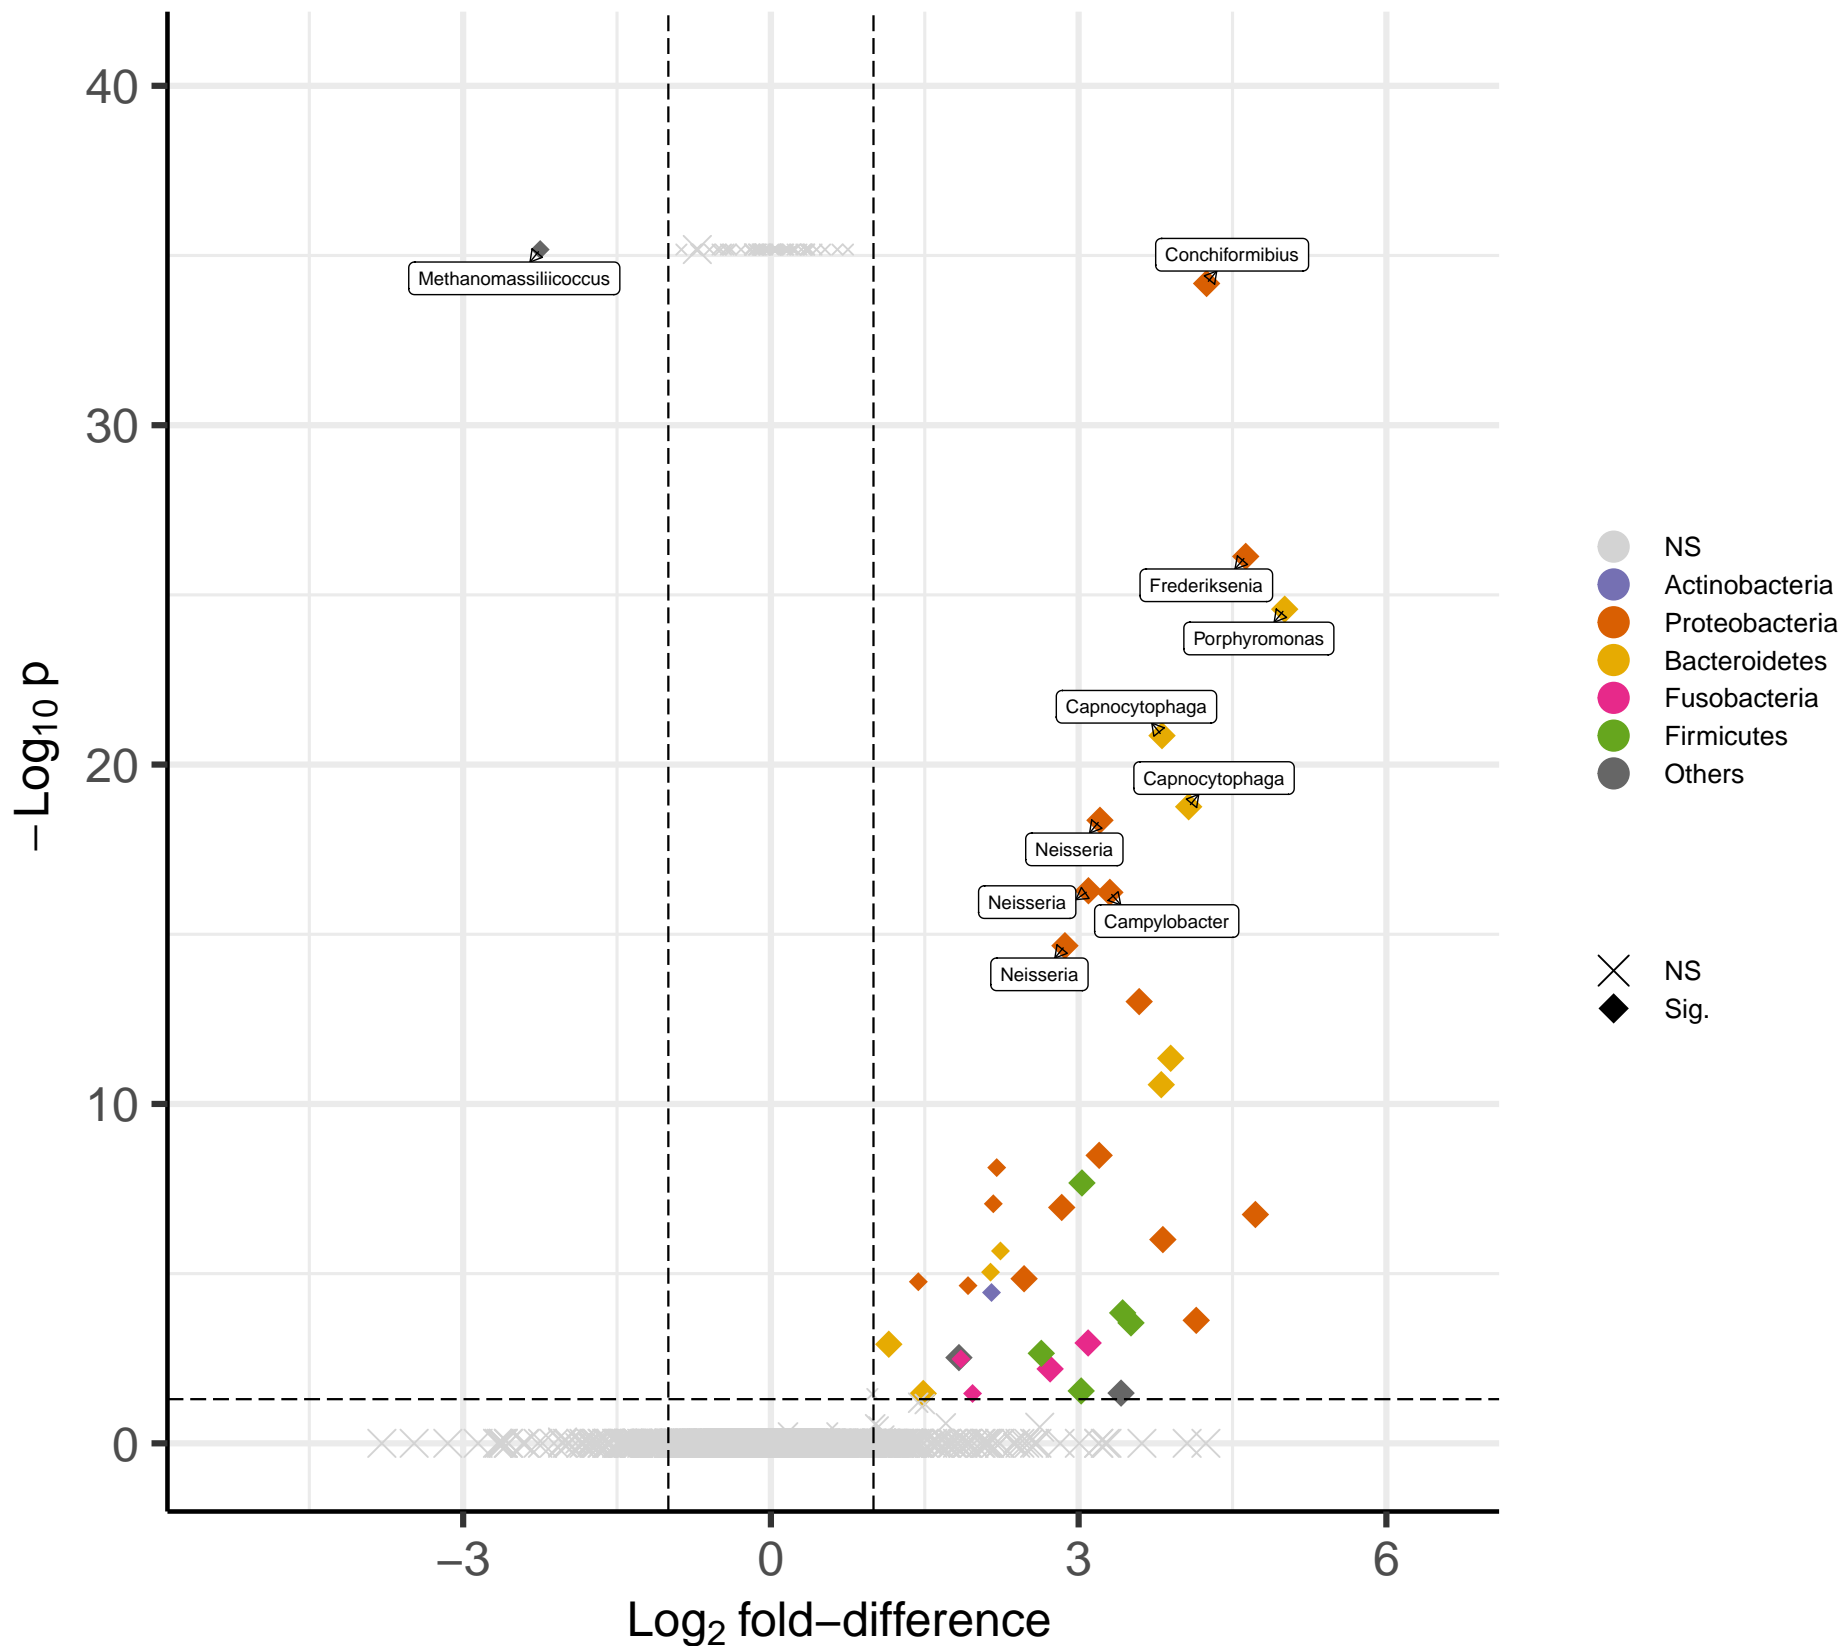

# Cats (vs. no cats)

15 Sig. DA taxa

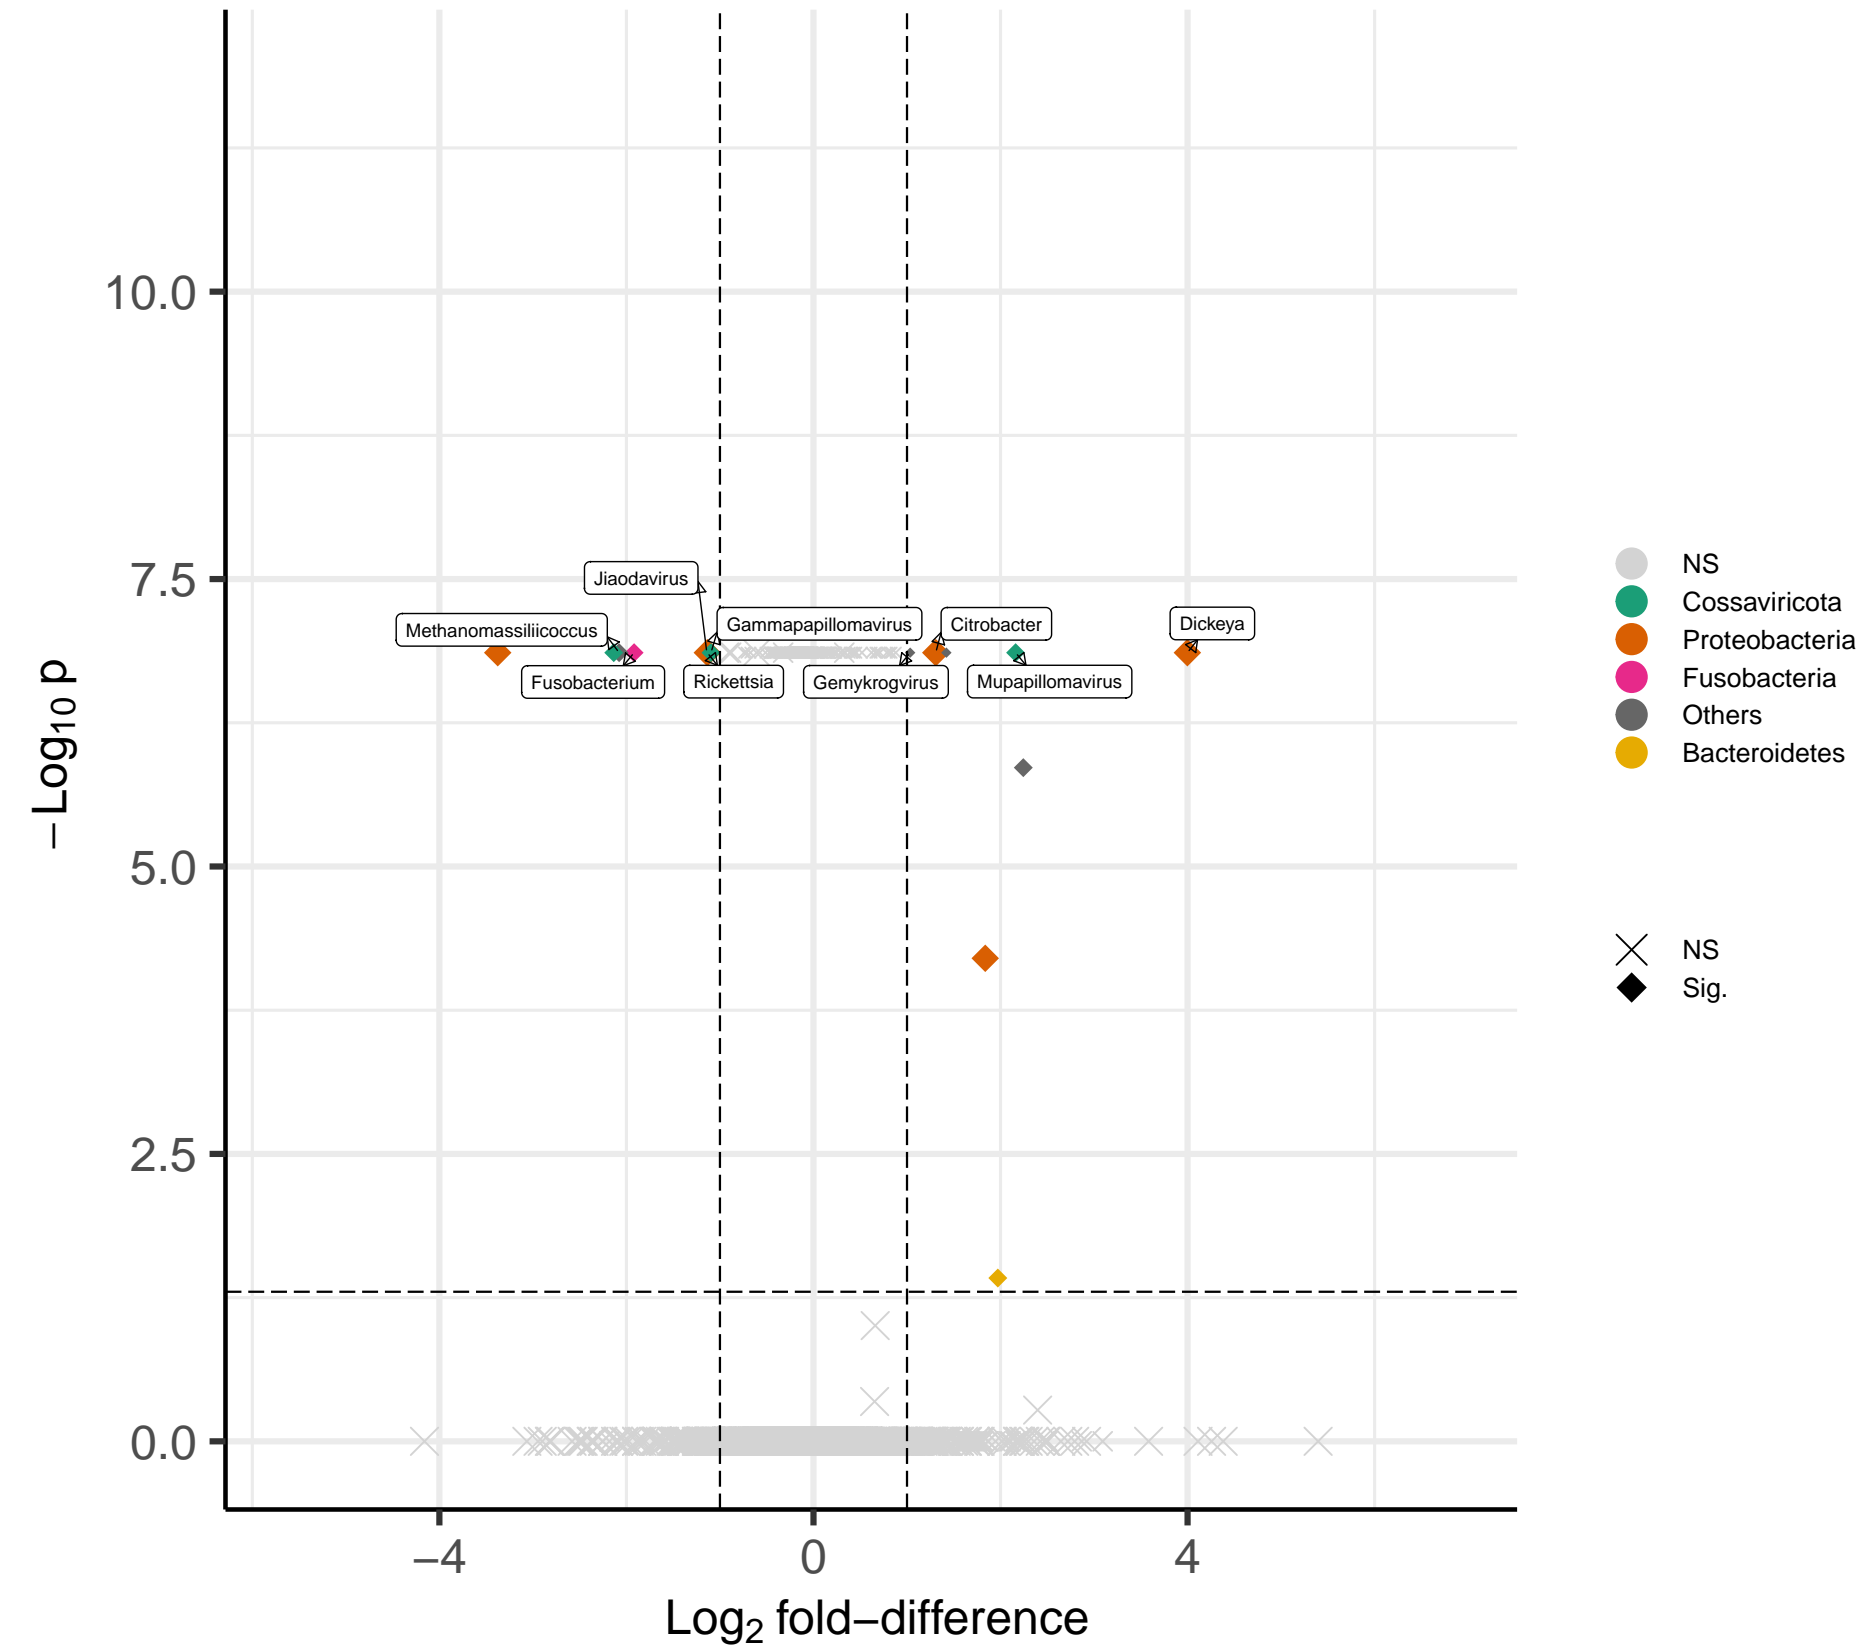

# Home condition, higher category (vs. lower category)

46 Sig. DA taxa

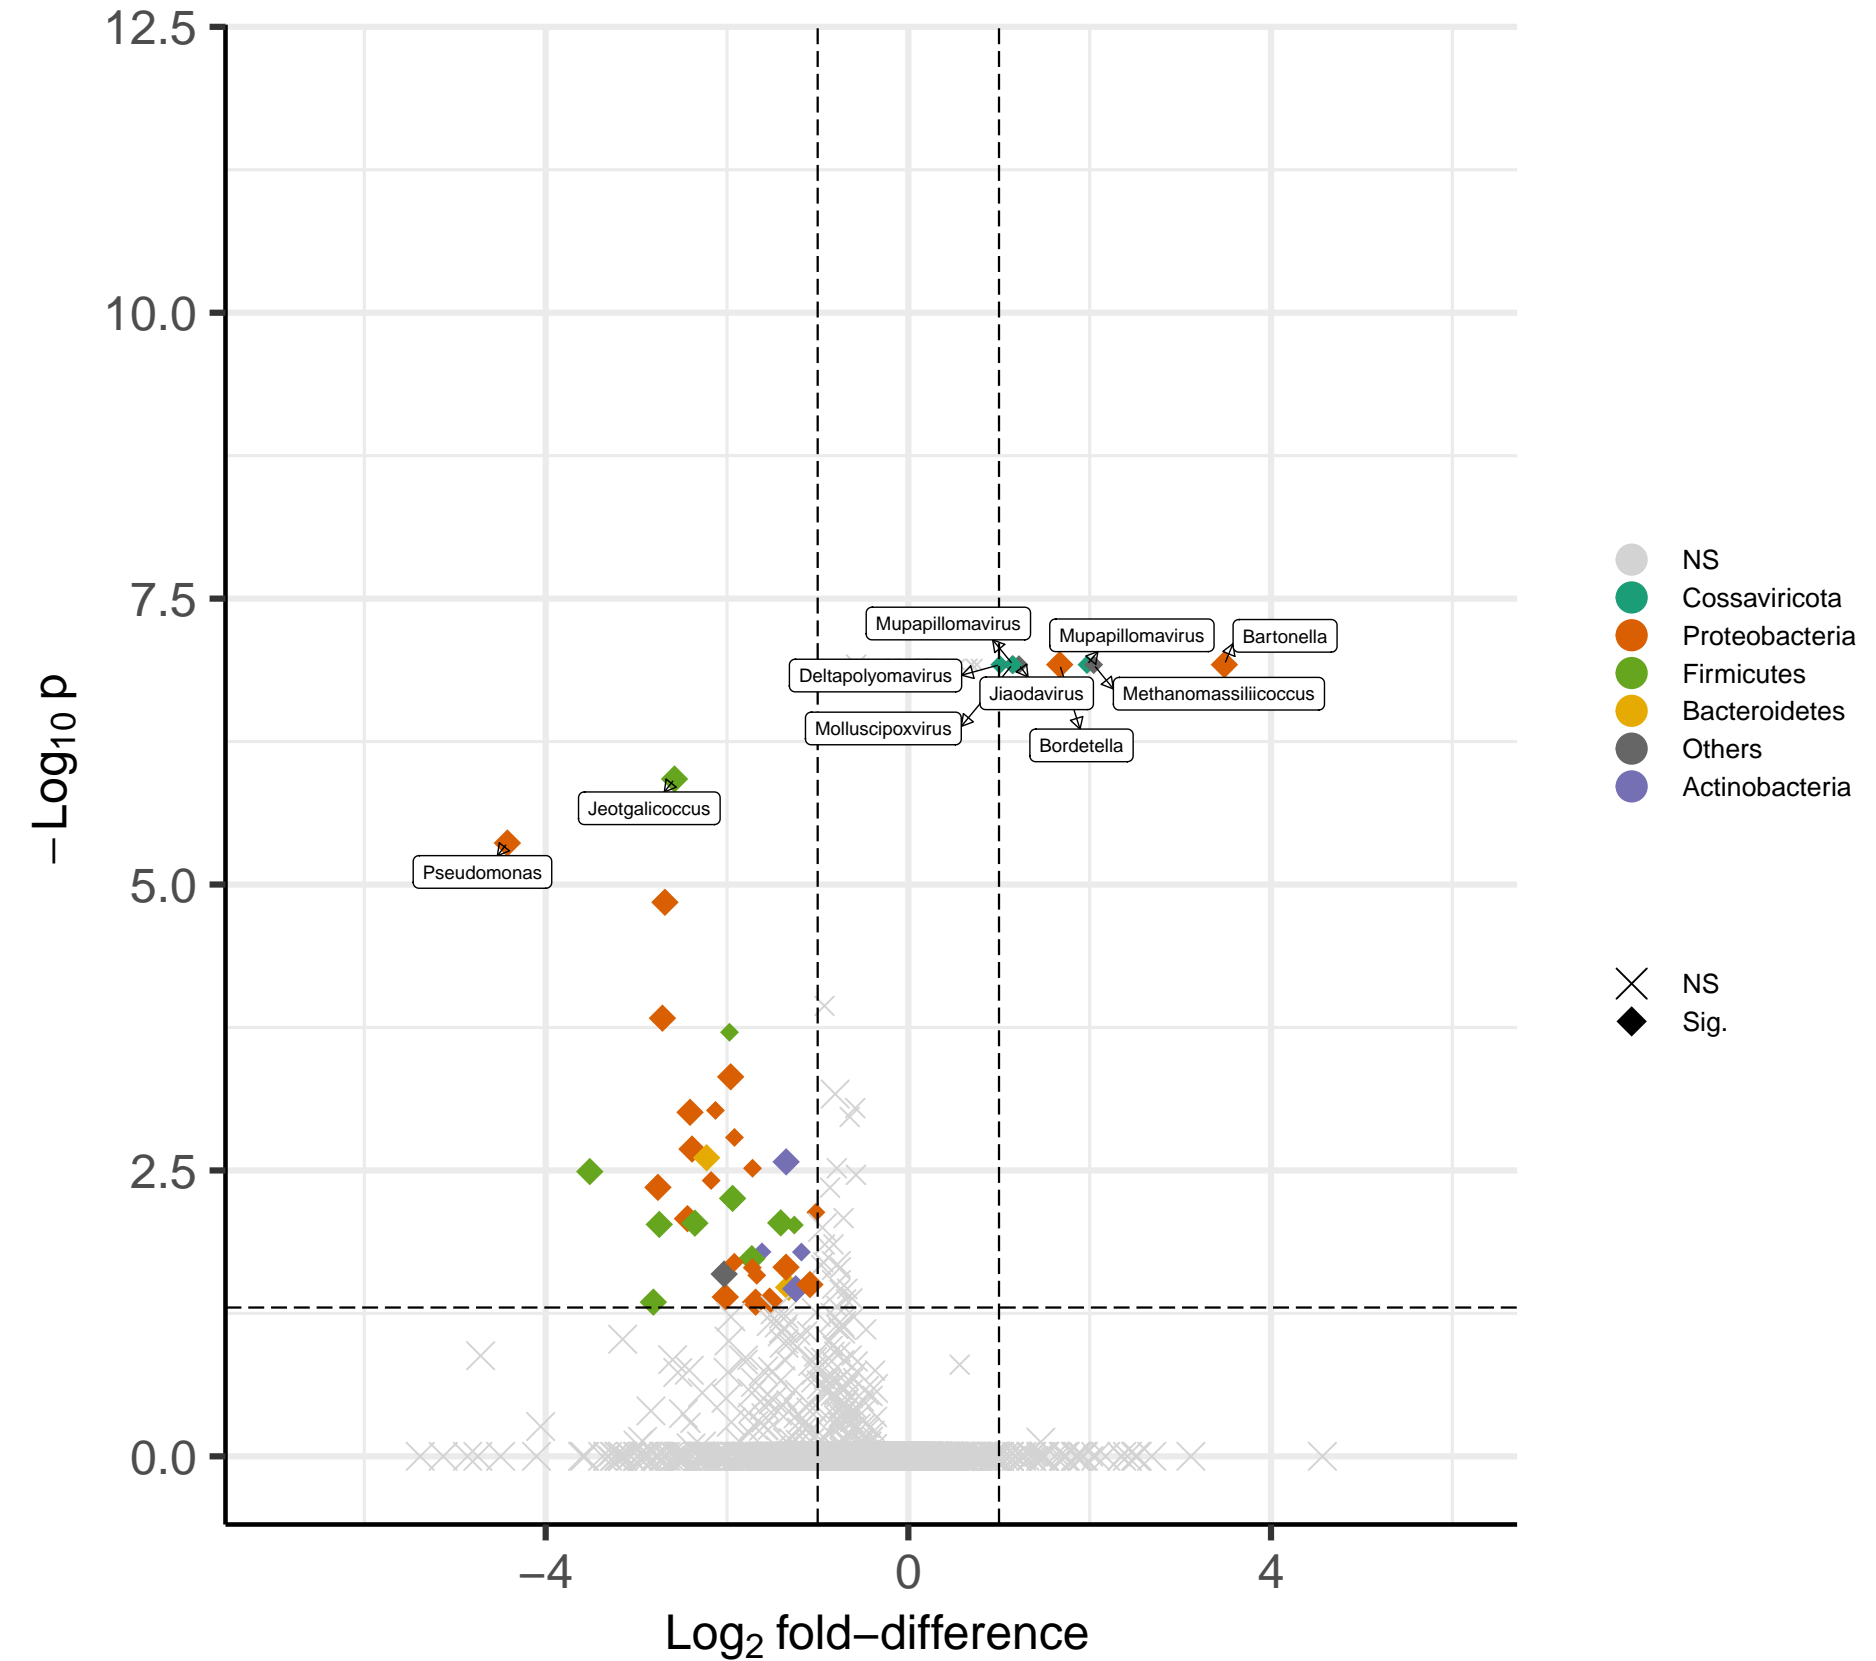

# Carpeting, carpeted surface (vs. smooth floor)

52 Sig. DA taxa

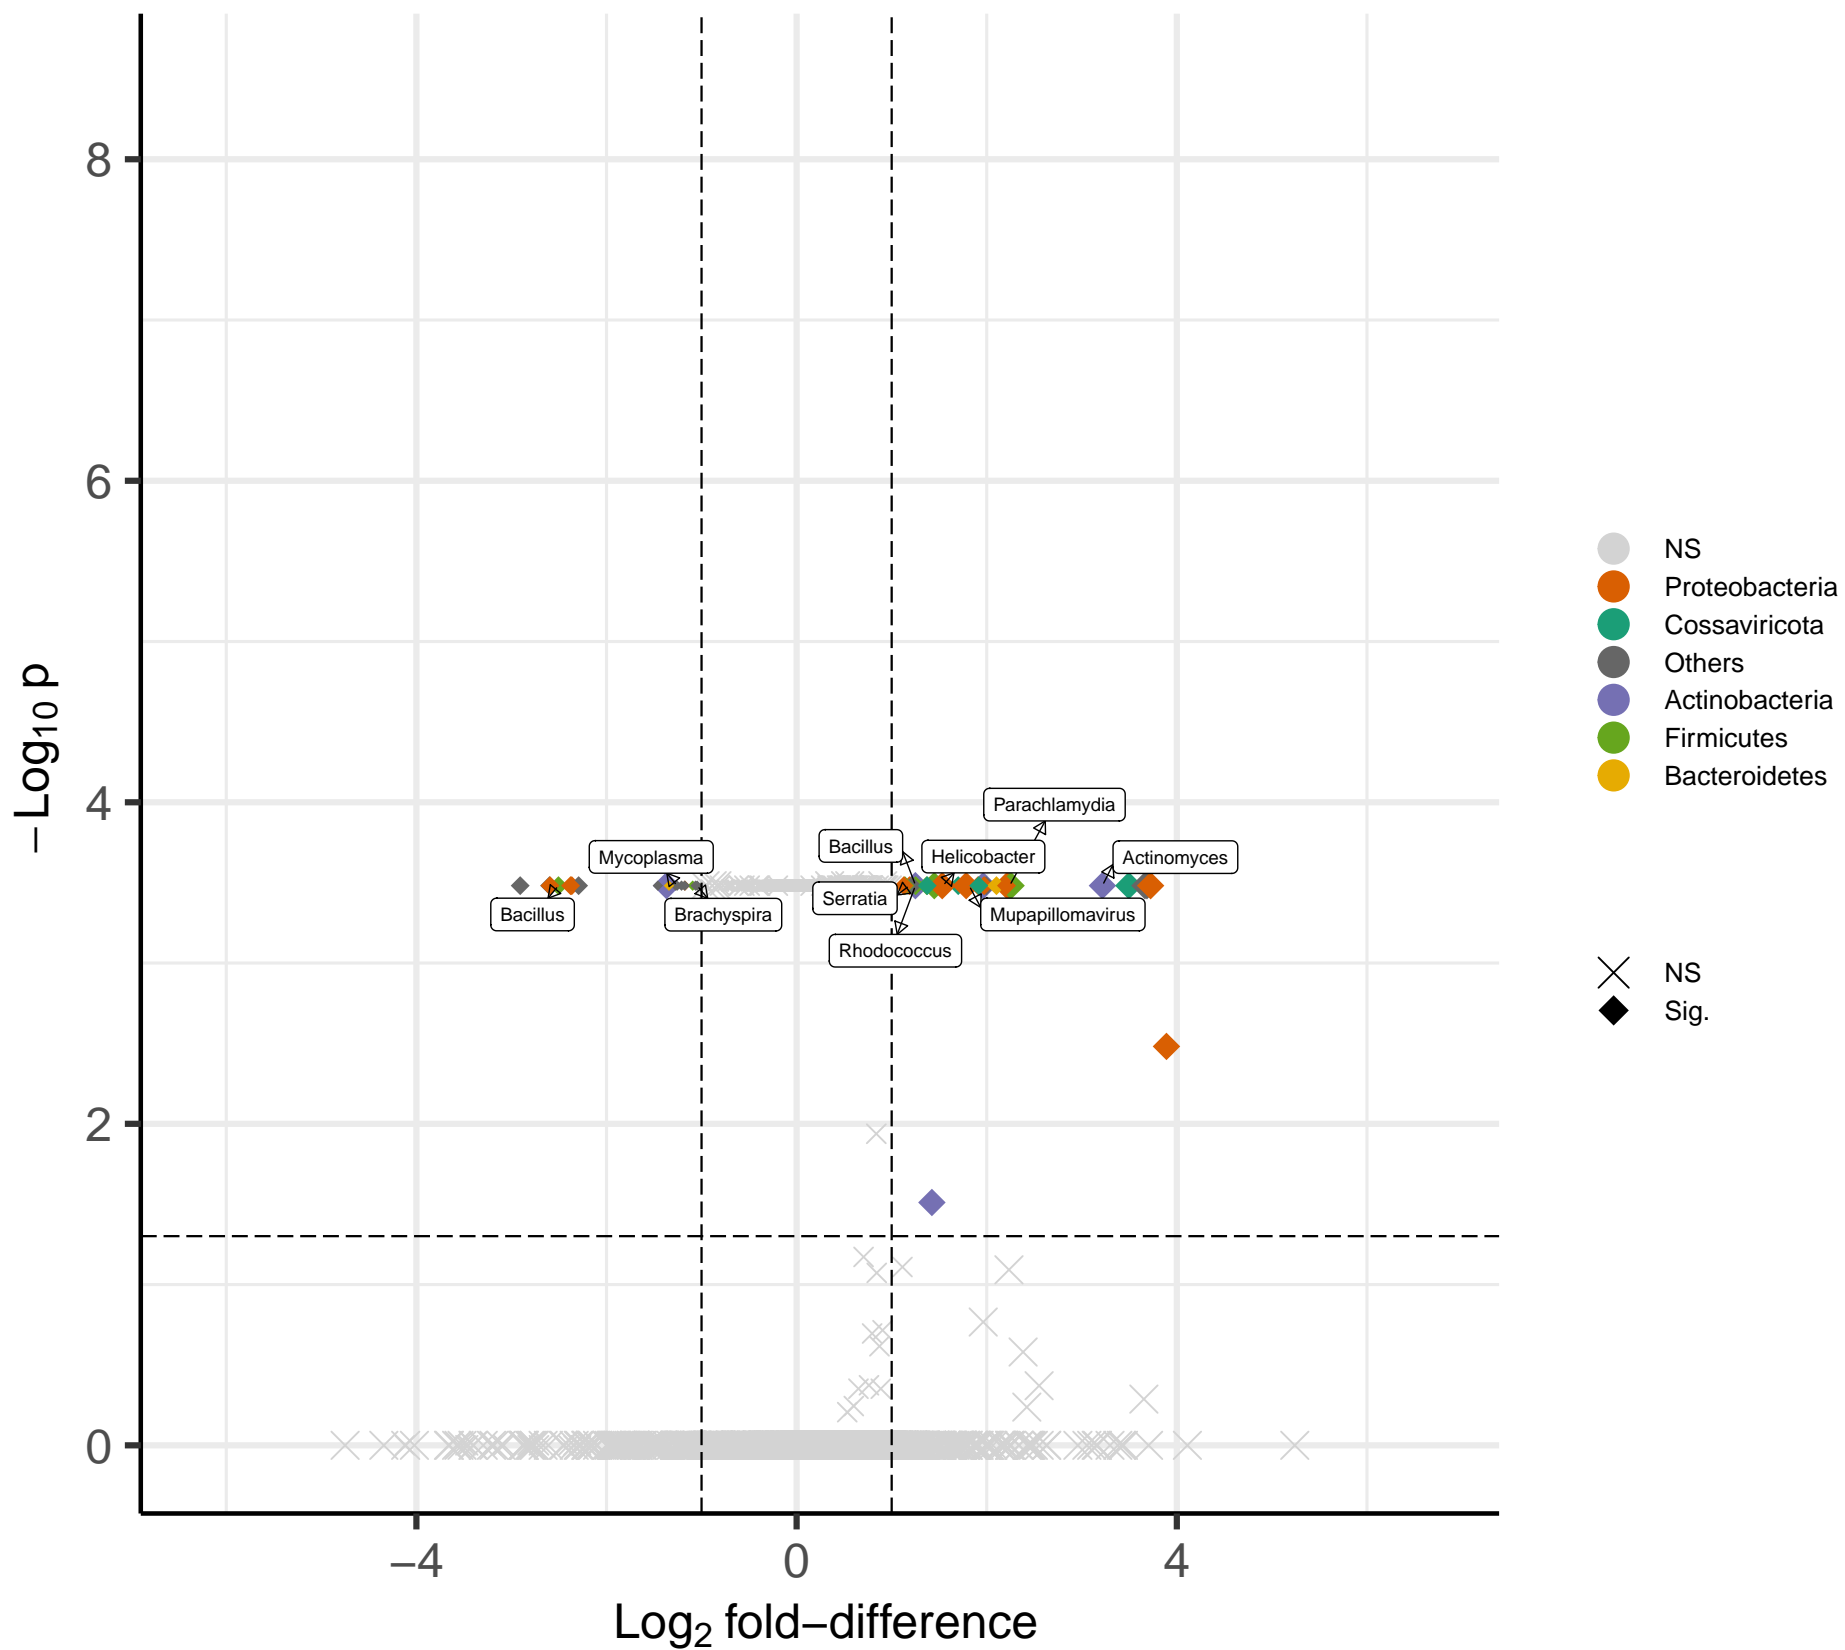

# Living on a farm (vs. not living on a farm)

10 Sig. DA taxa

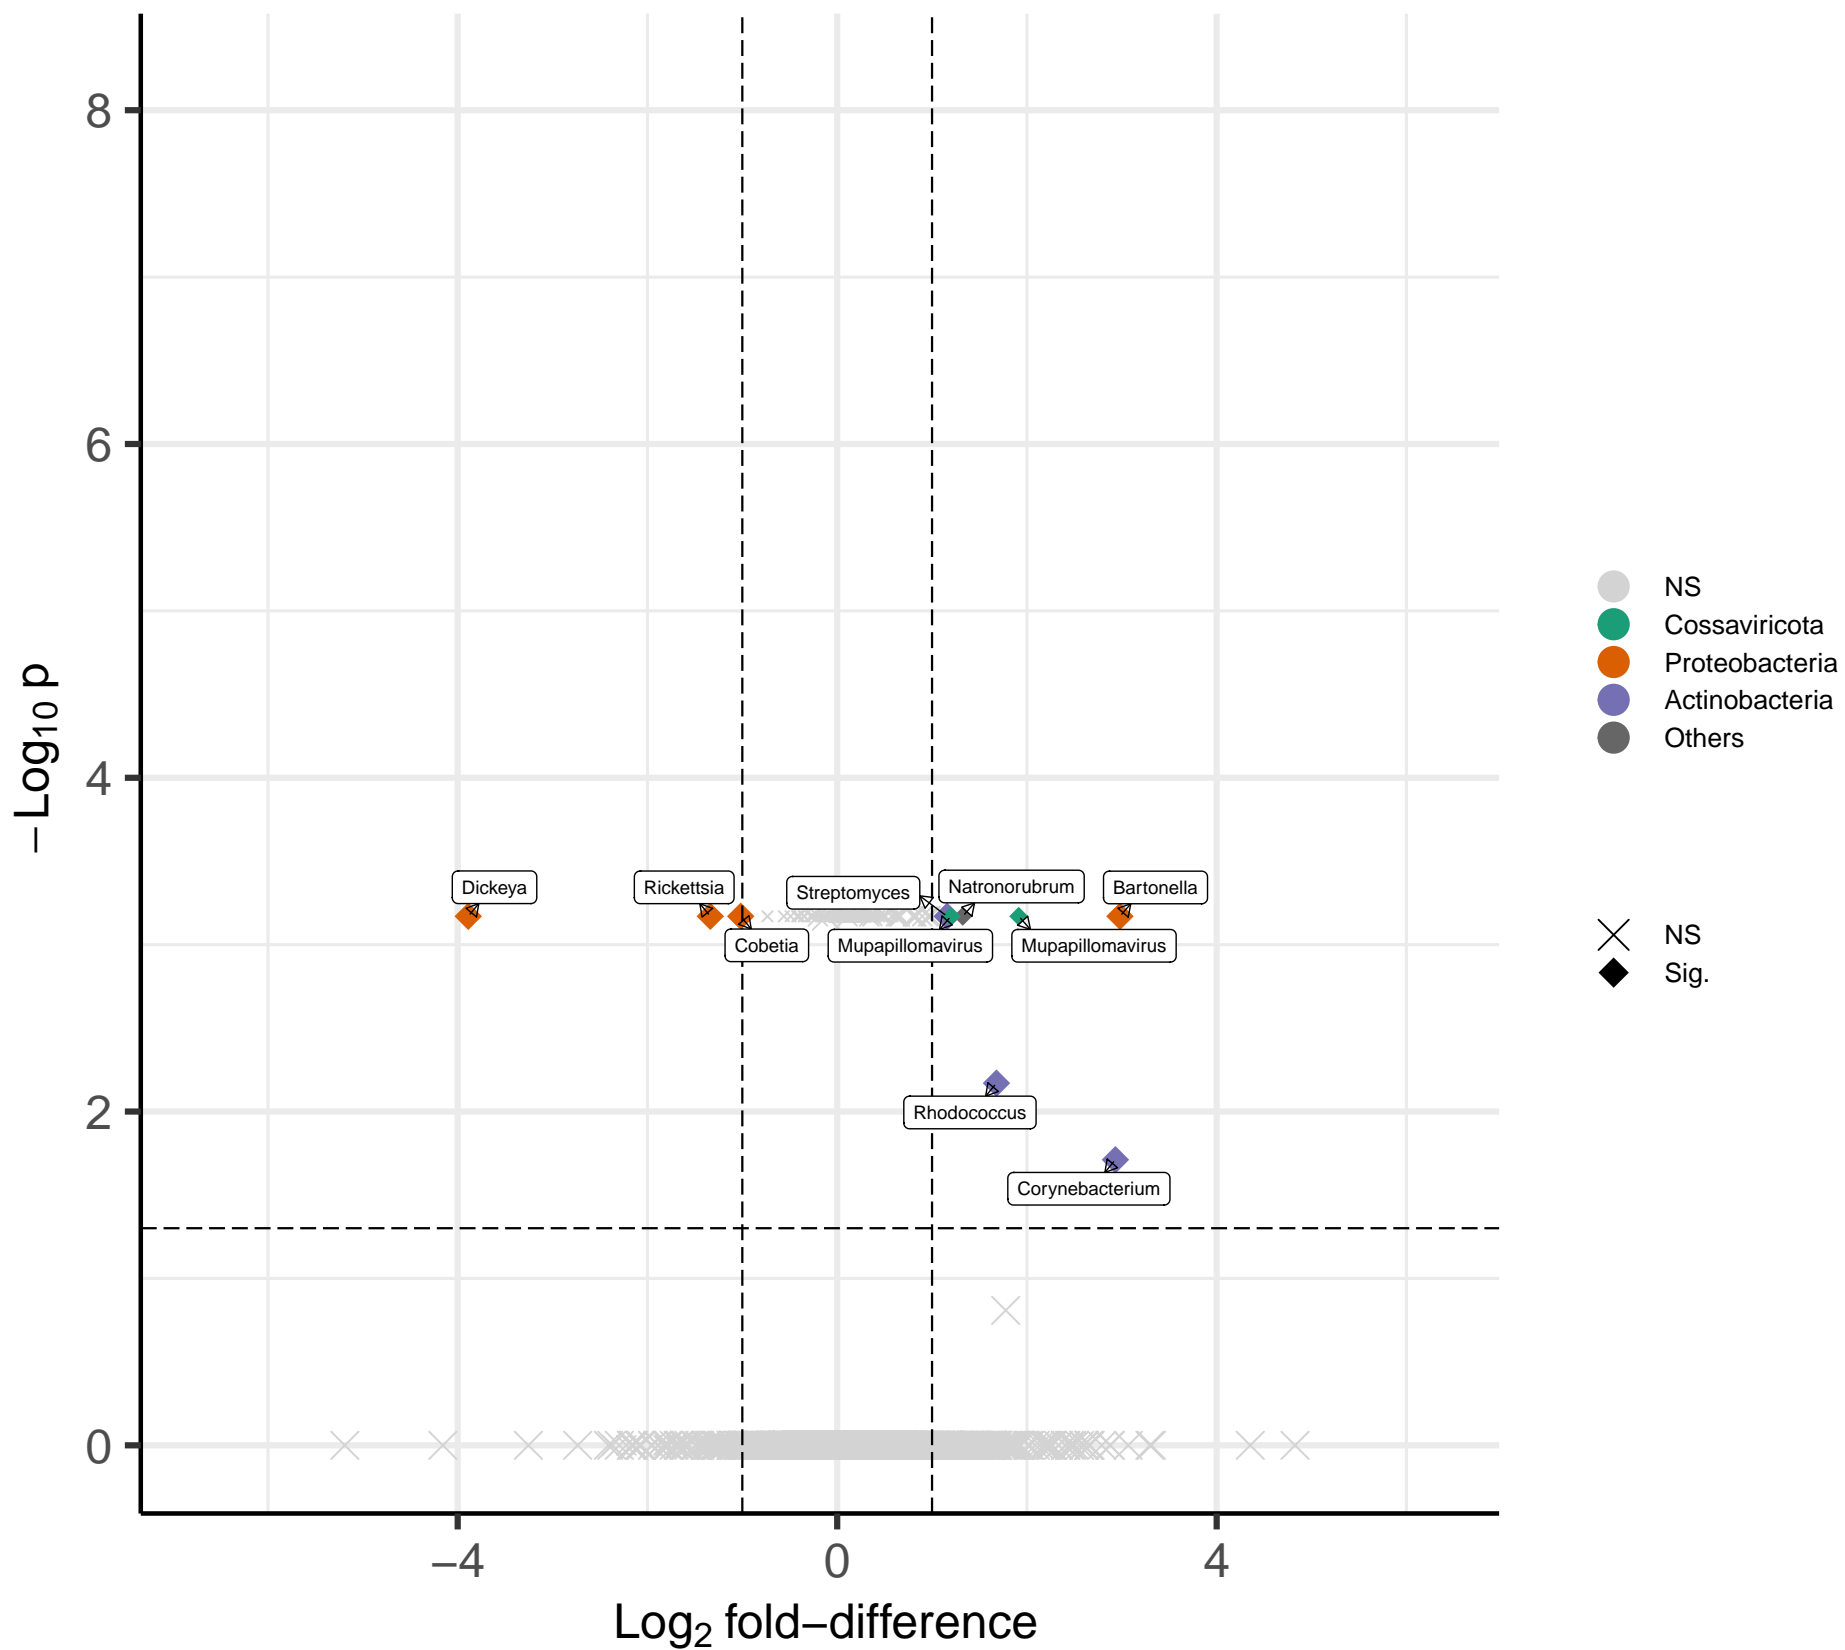

# Crop farming (vs. no crop farming)

4 Sig. DA taxa

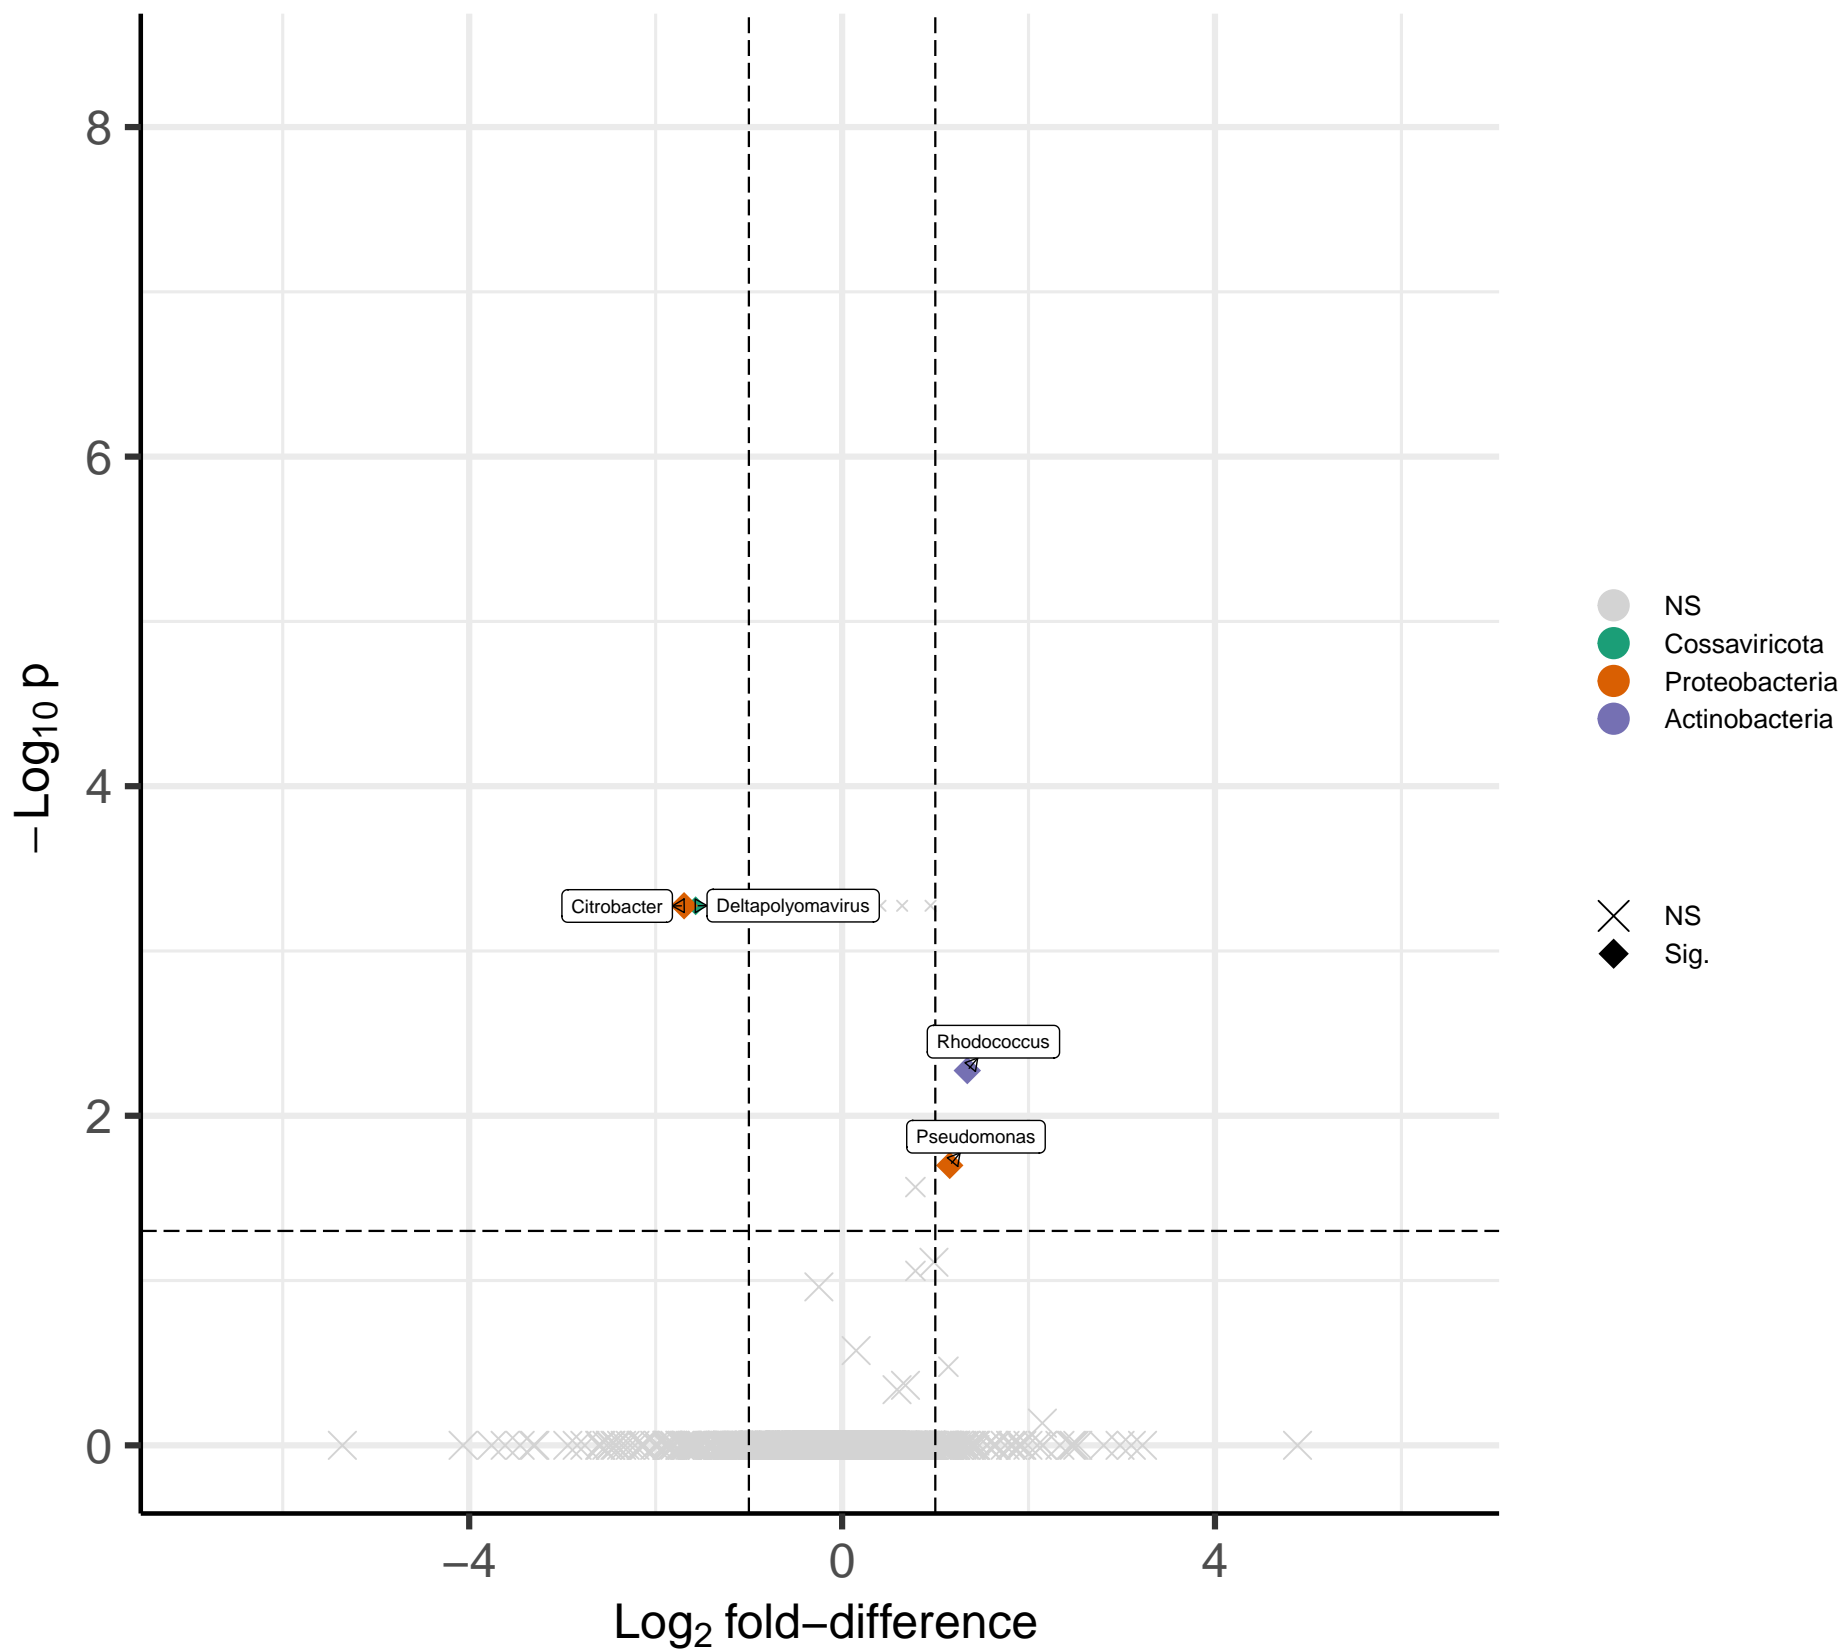





# Working with beef cattle (vs. no beef cattle)

12 Sig. DA taxa

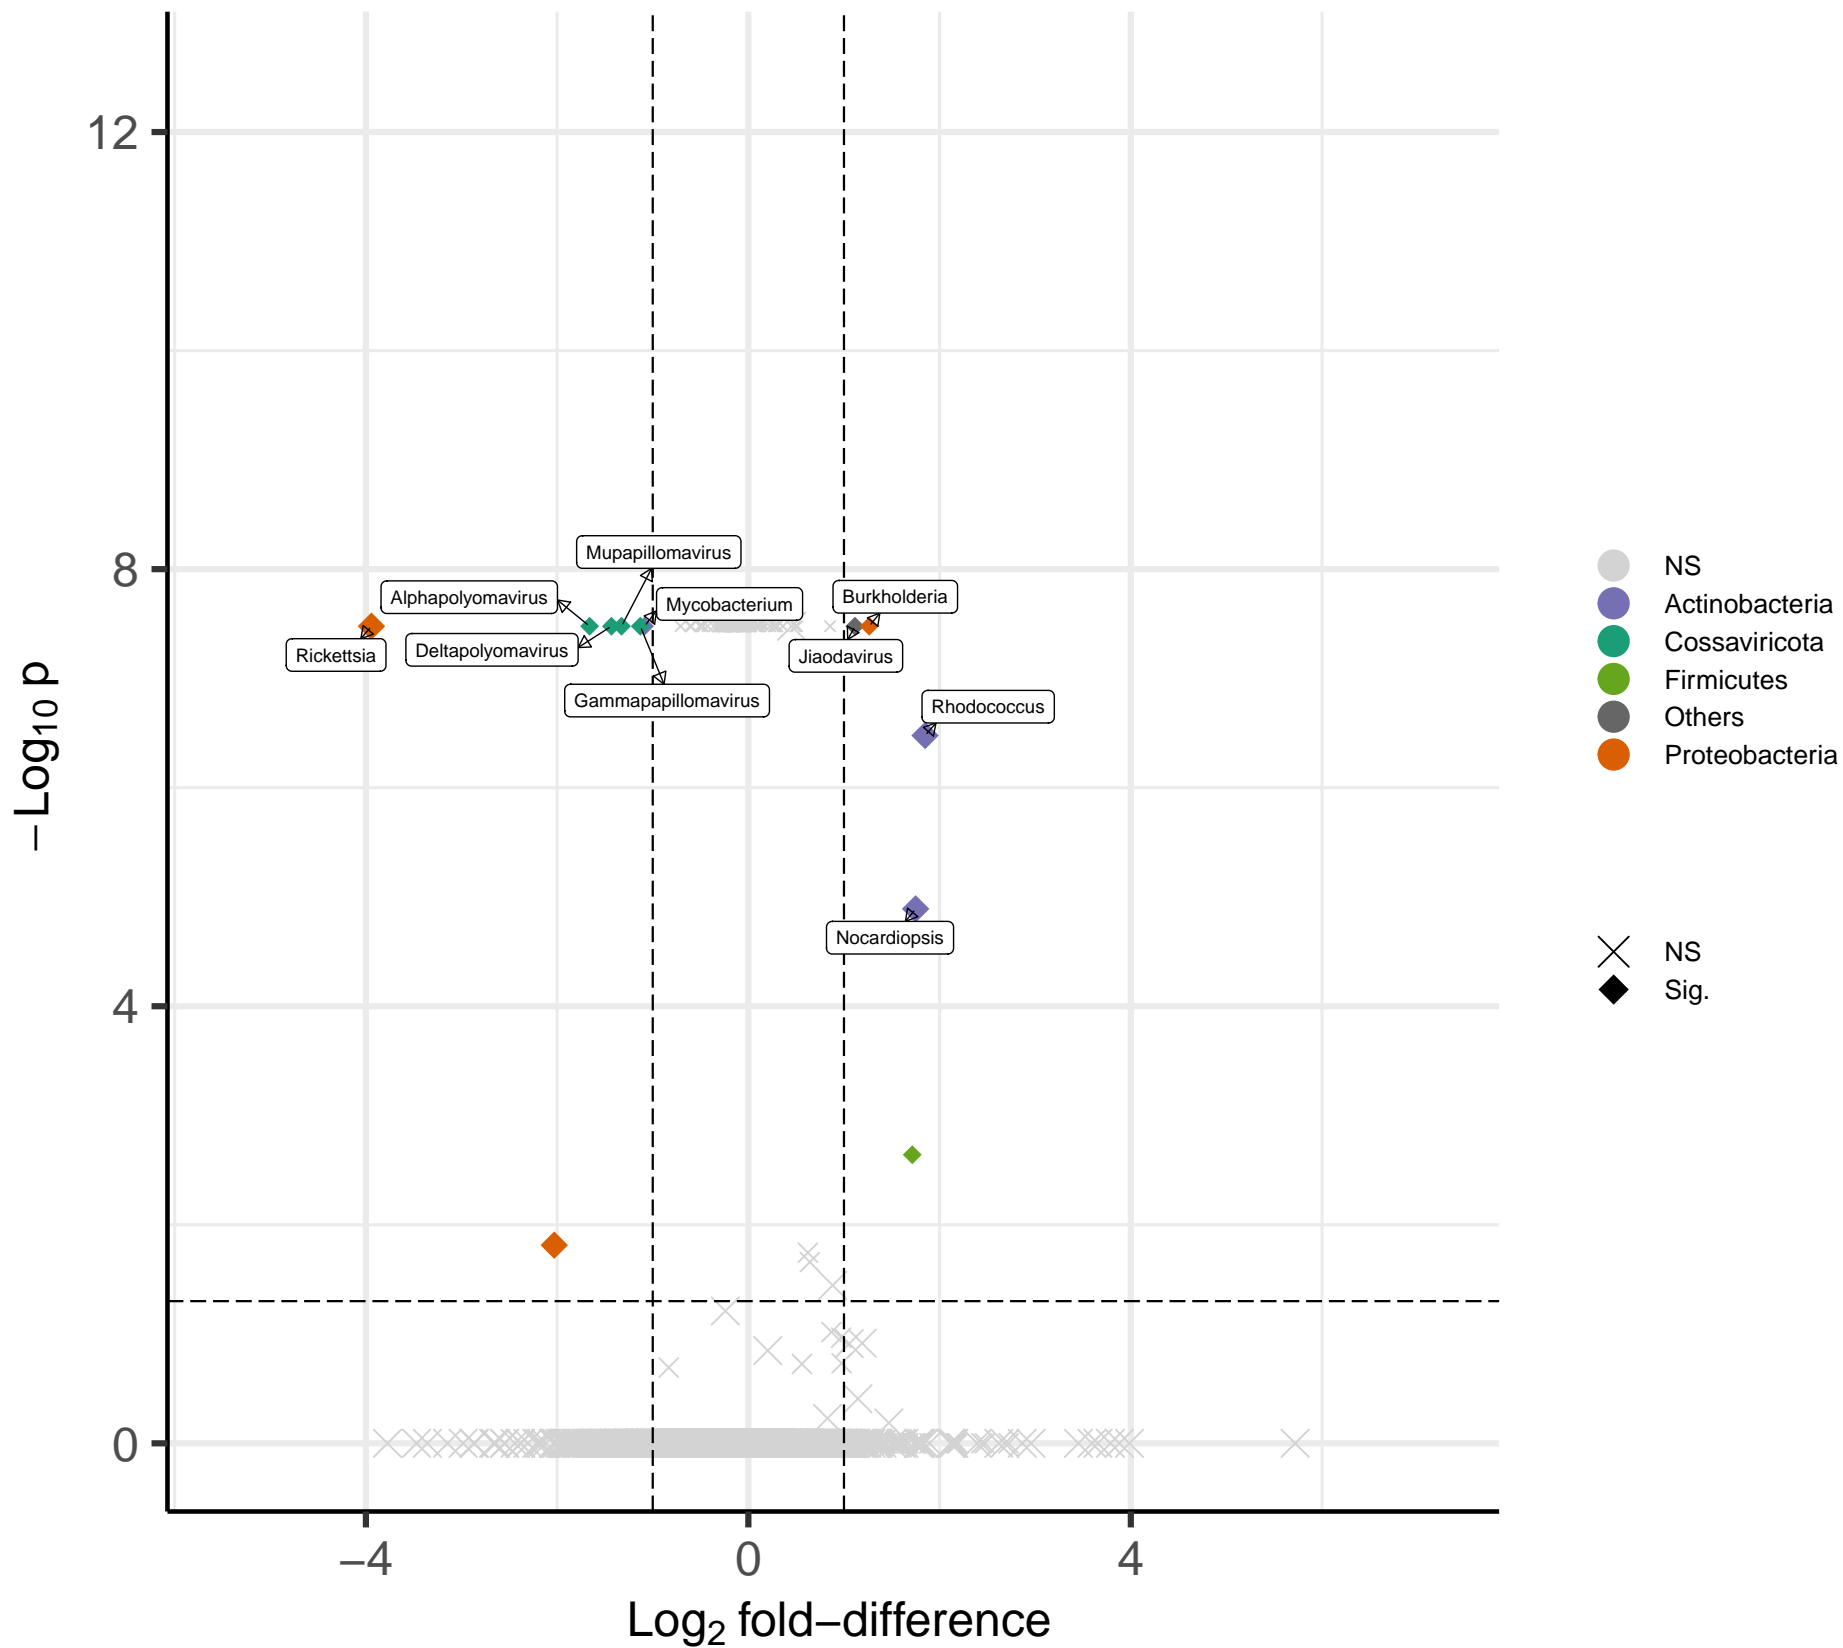



# Working with hogs (vs. no hogs)

44 Sig. DA taxa

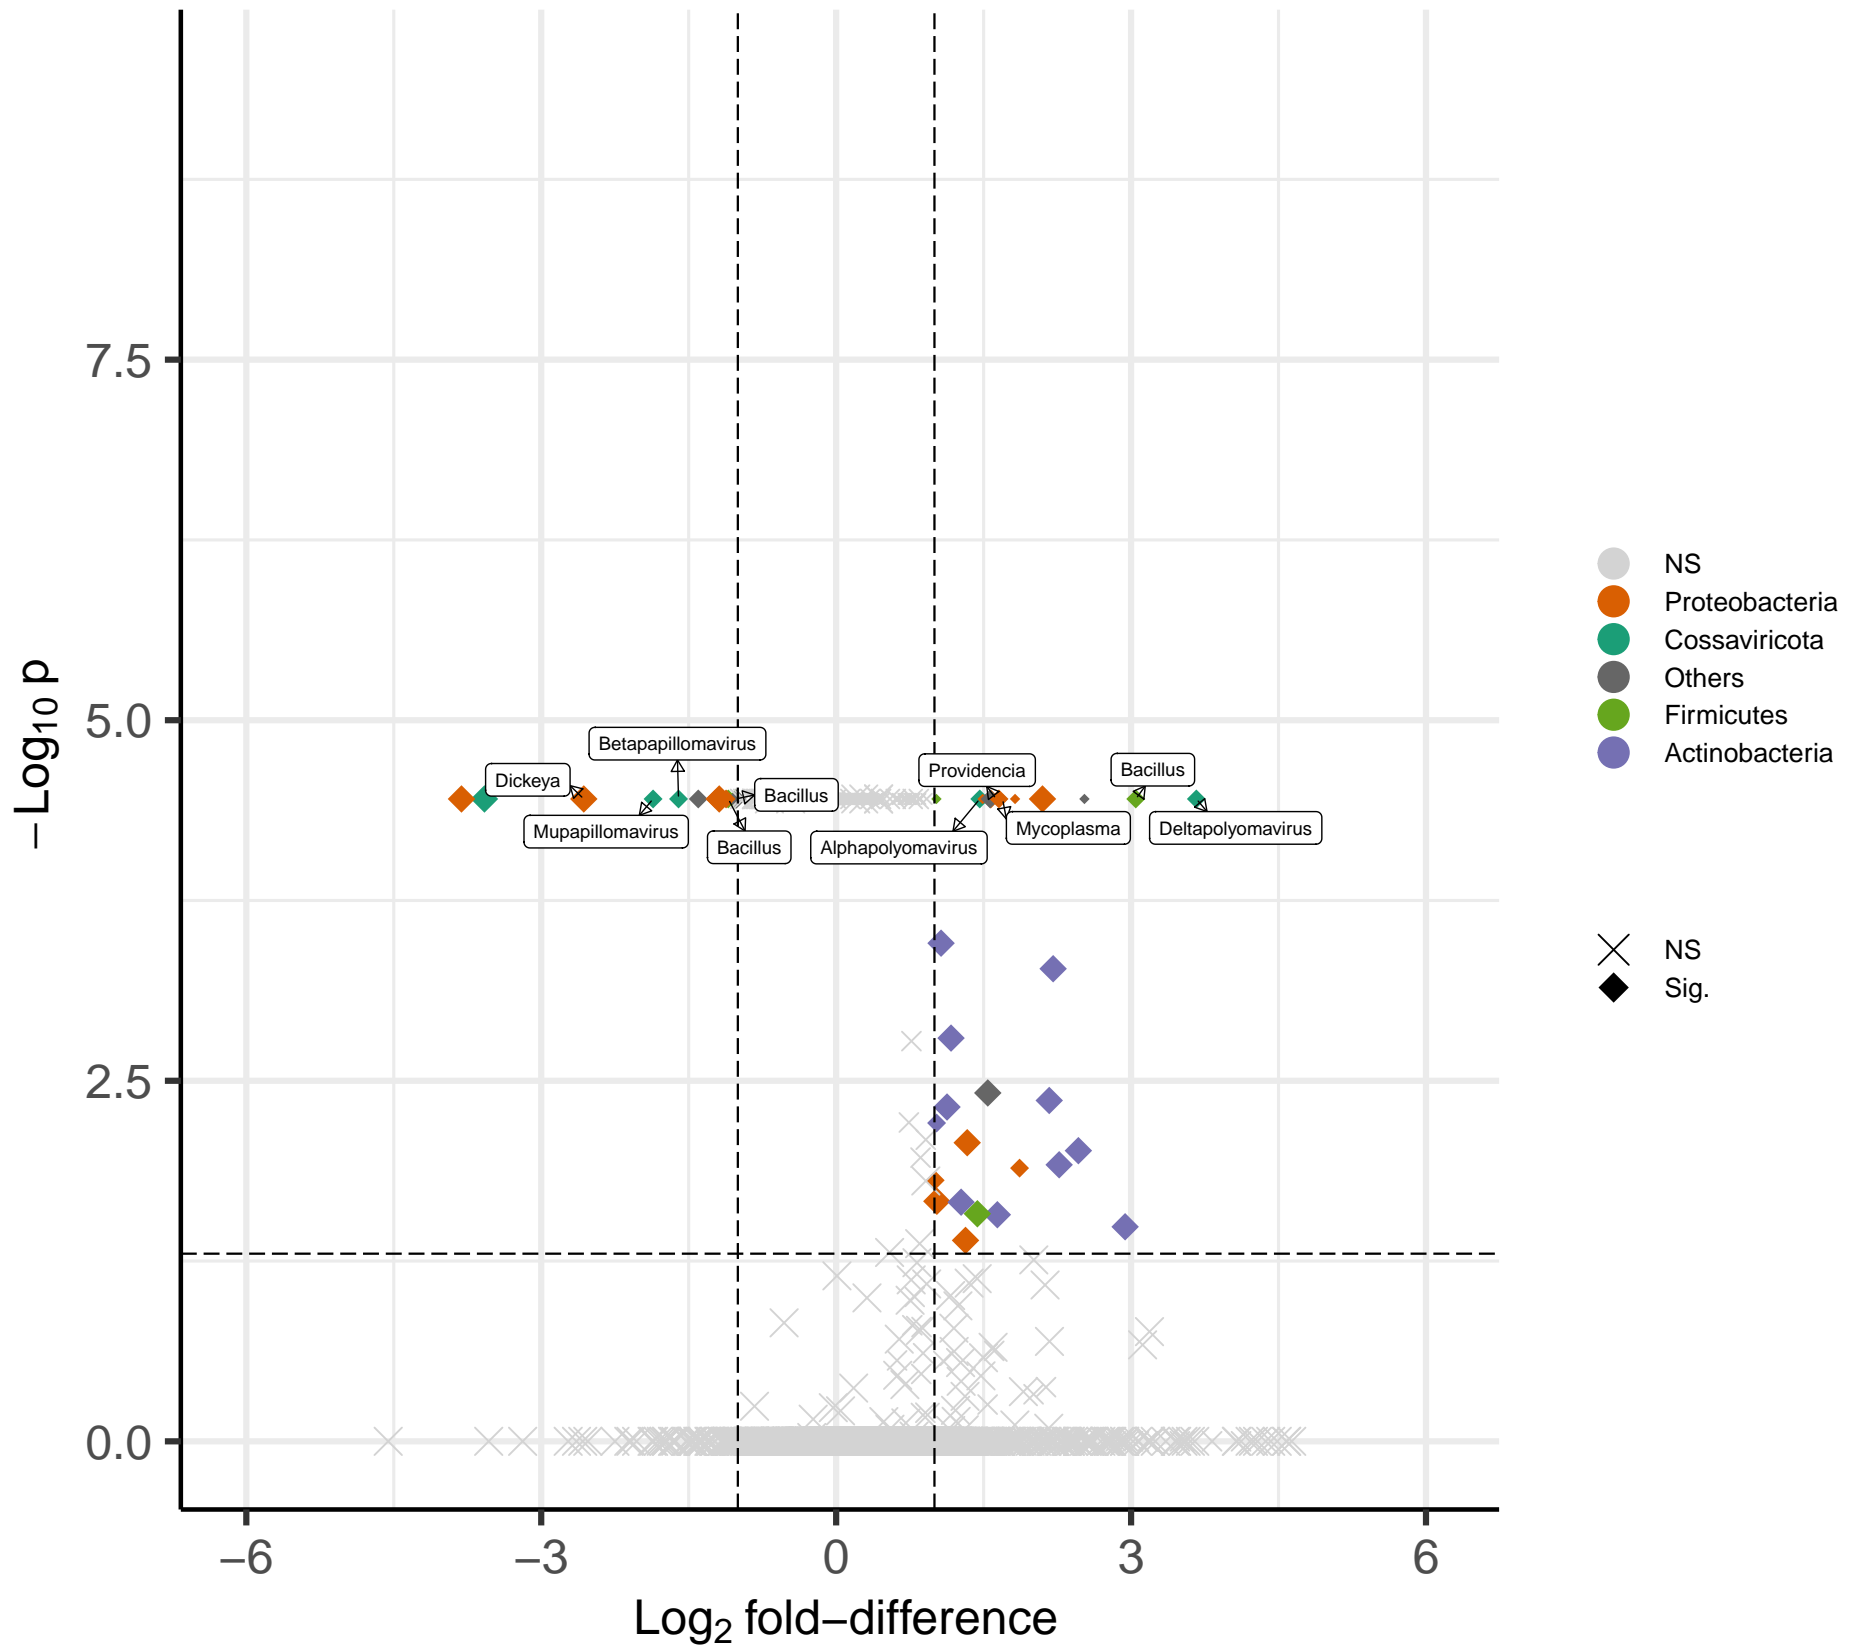

# Working with poultry (vs. no poultry)

26 Sig. DA taxa

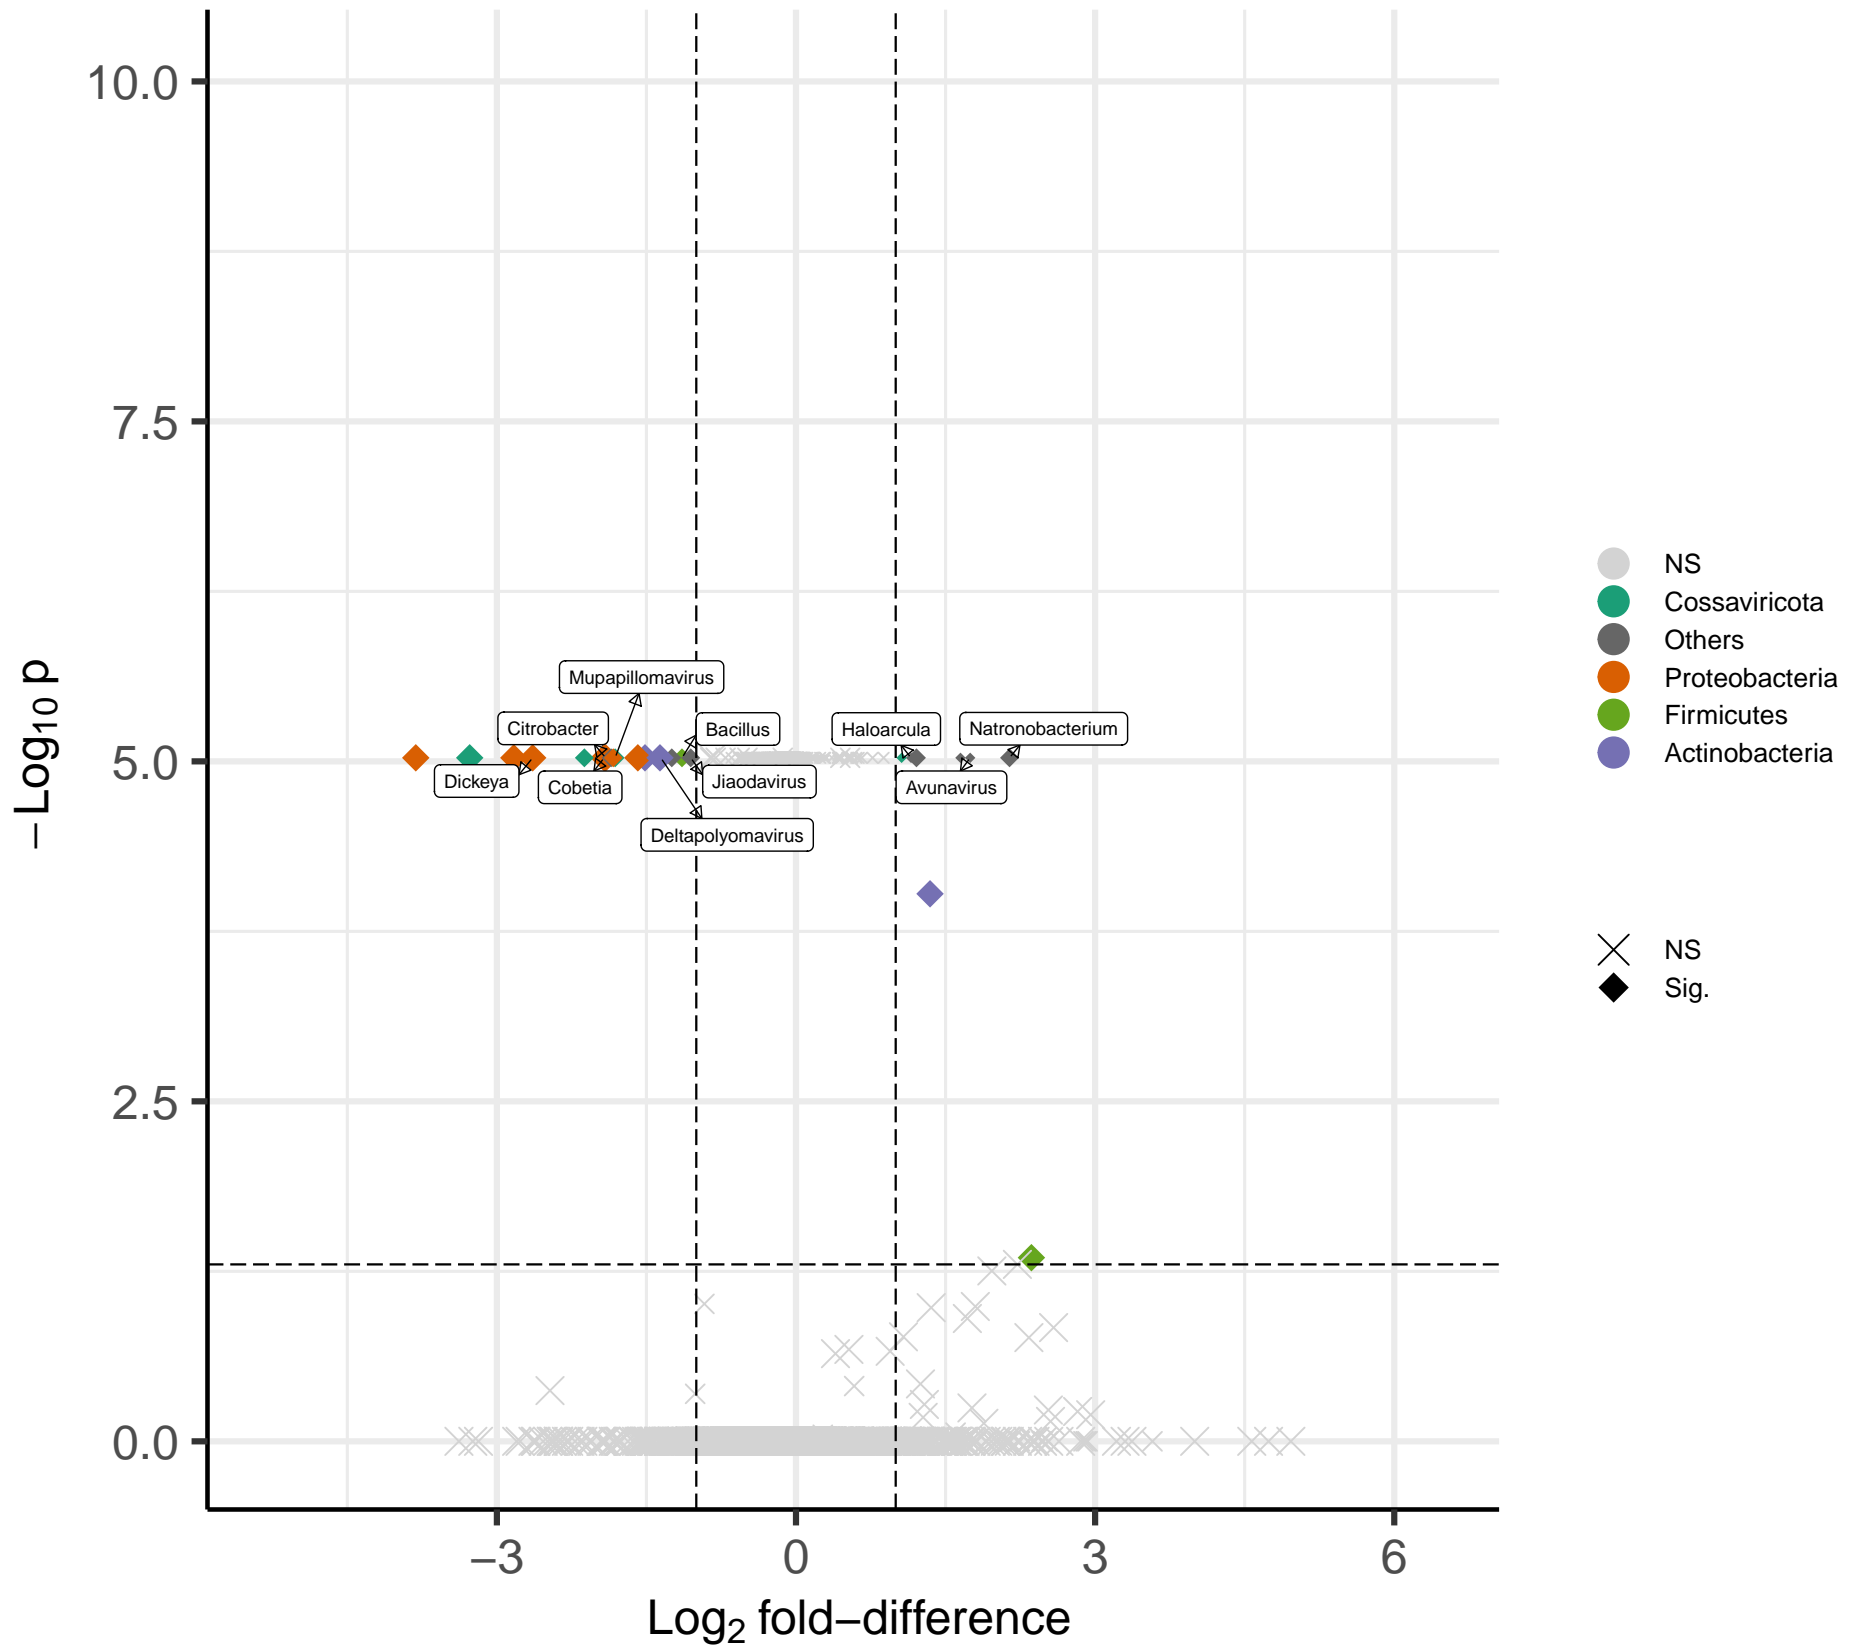

# Spring (vs. other seasons combined)

7 Sig. DA taxa

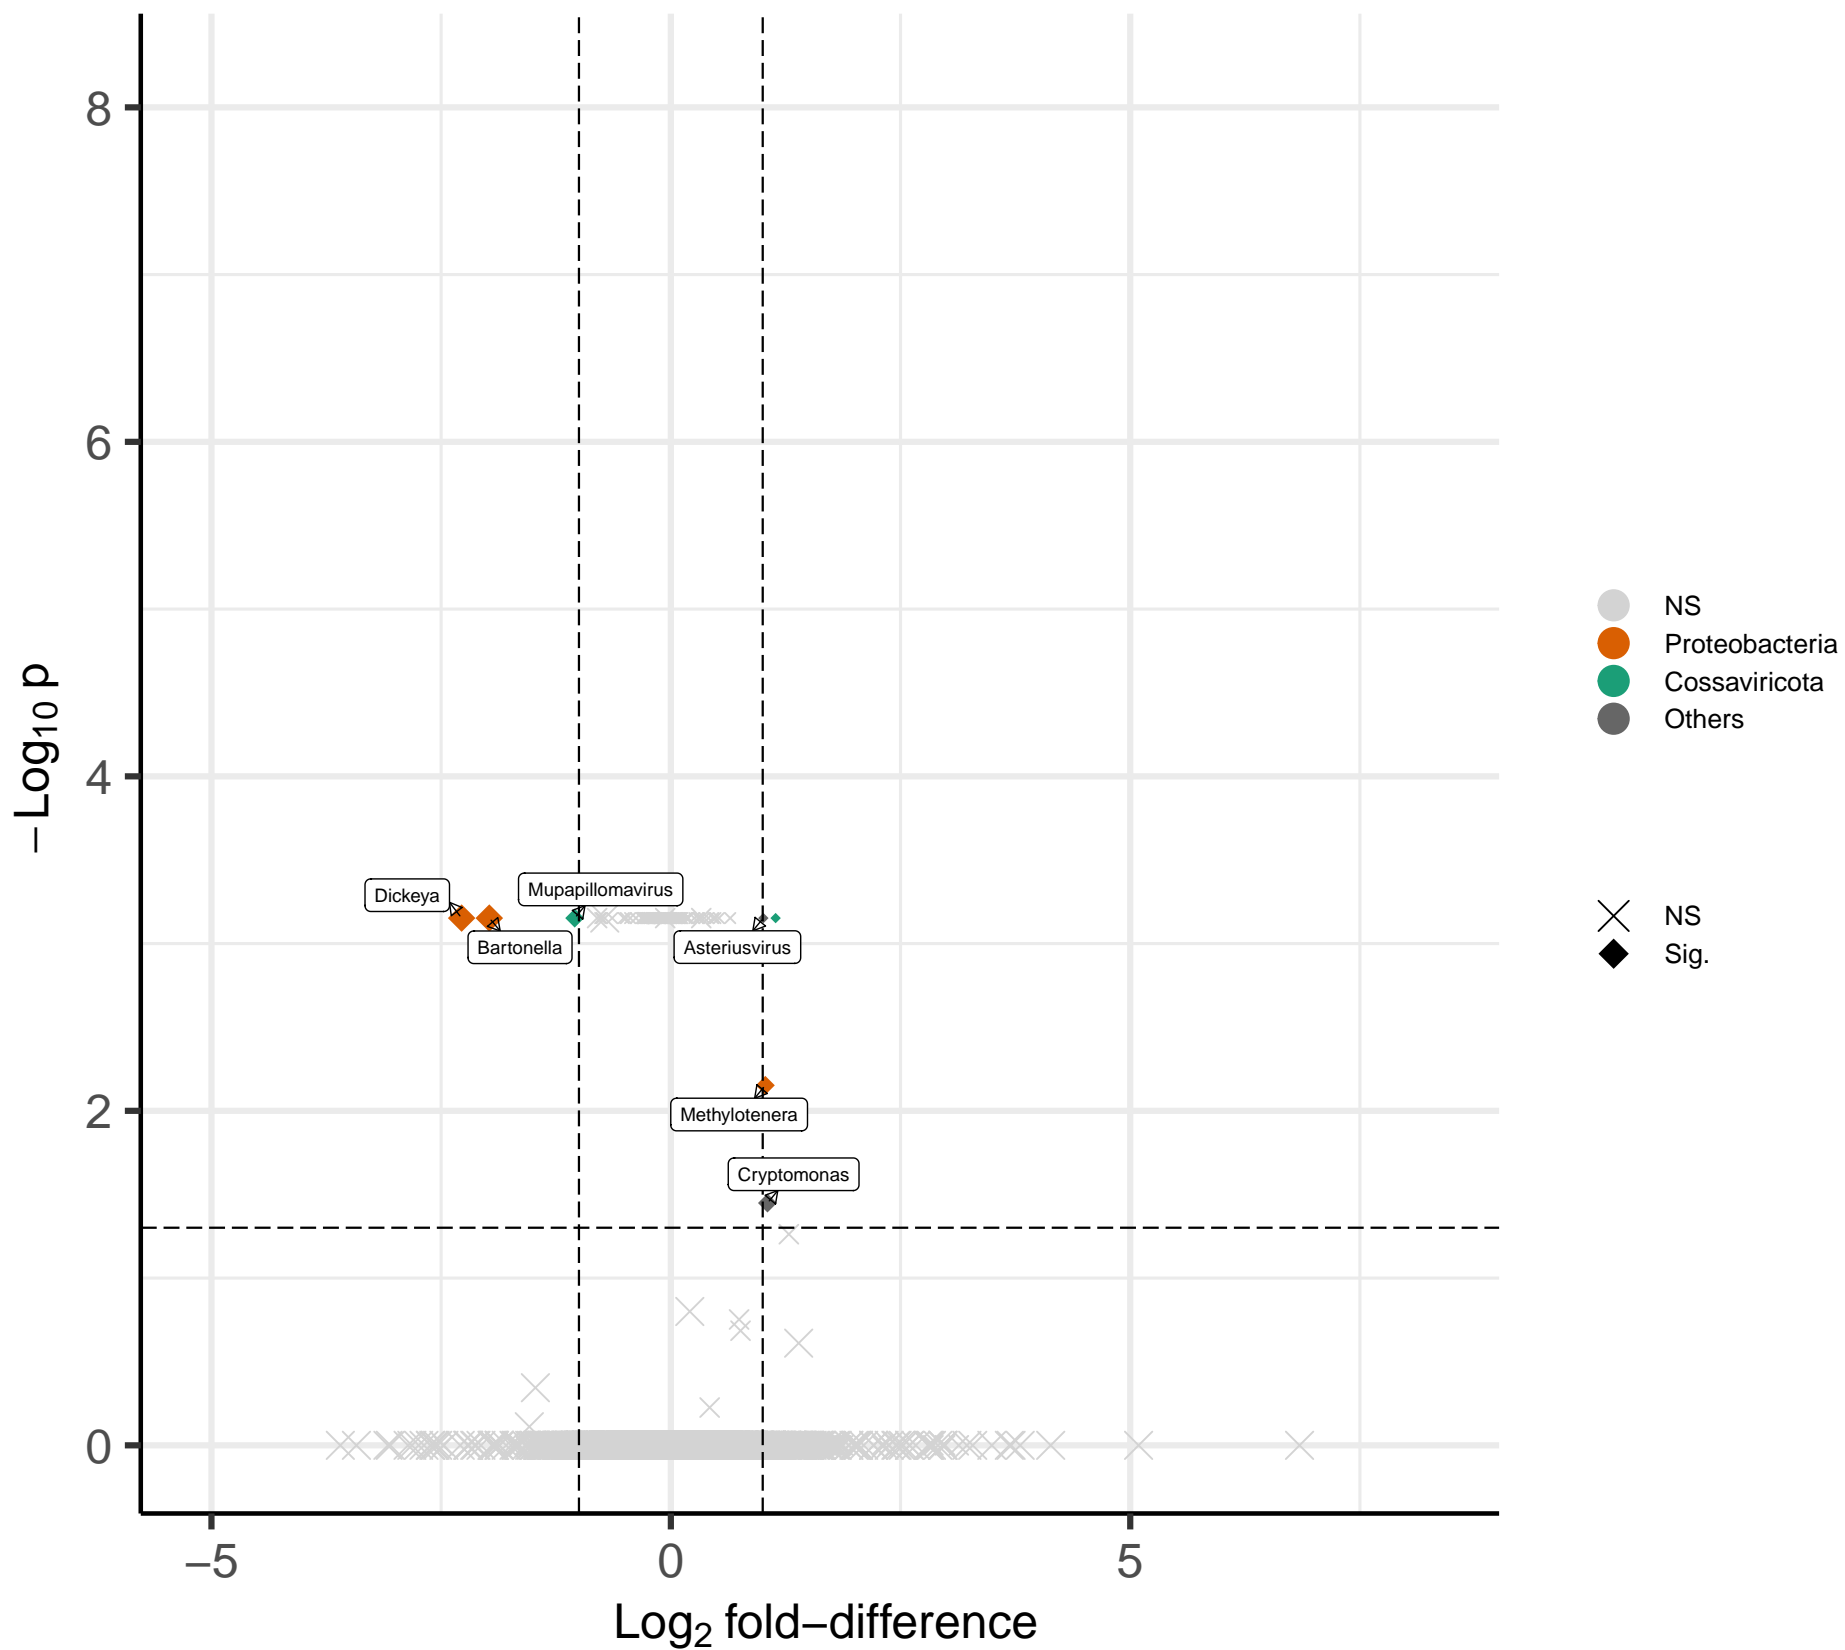

# Summer (vs. other seasons combined)

9 Sig. DA taxa

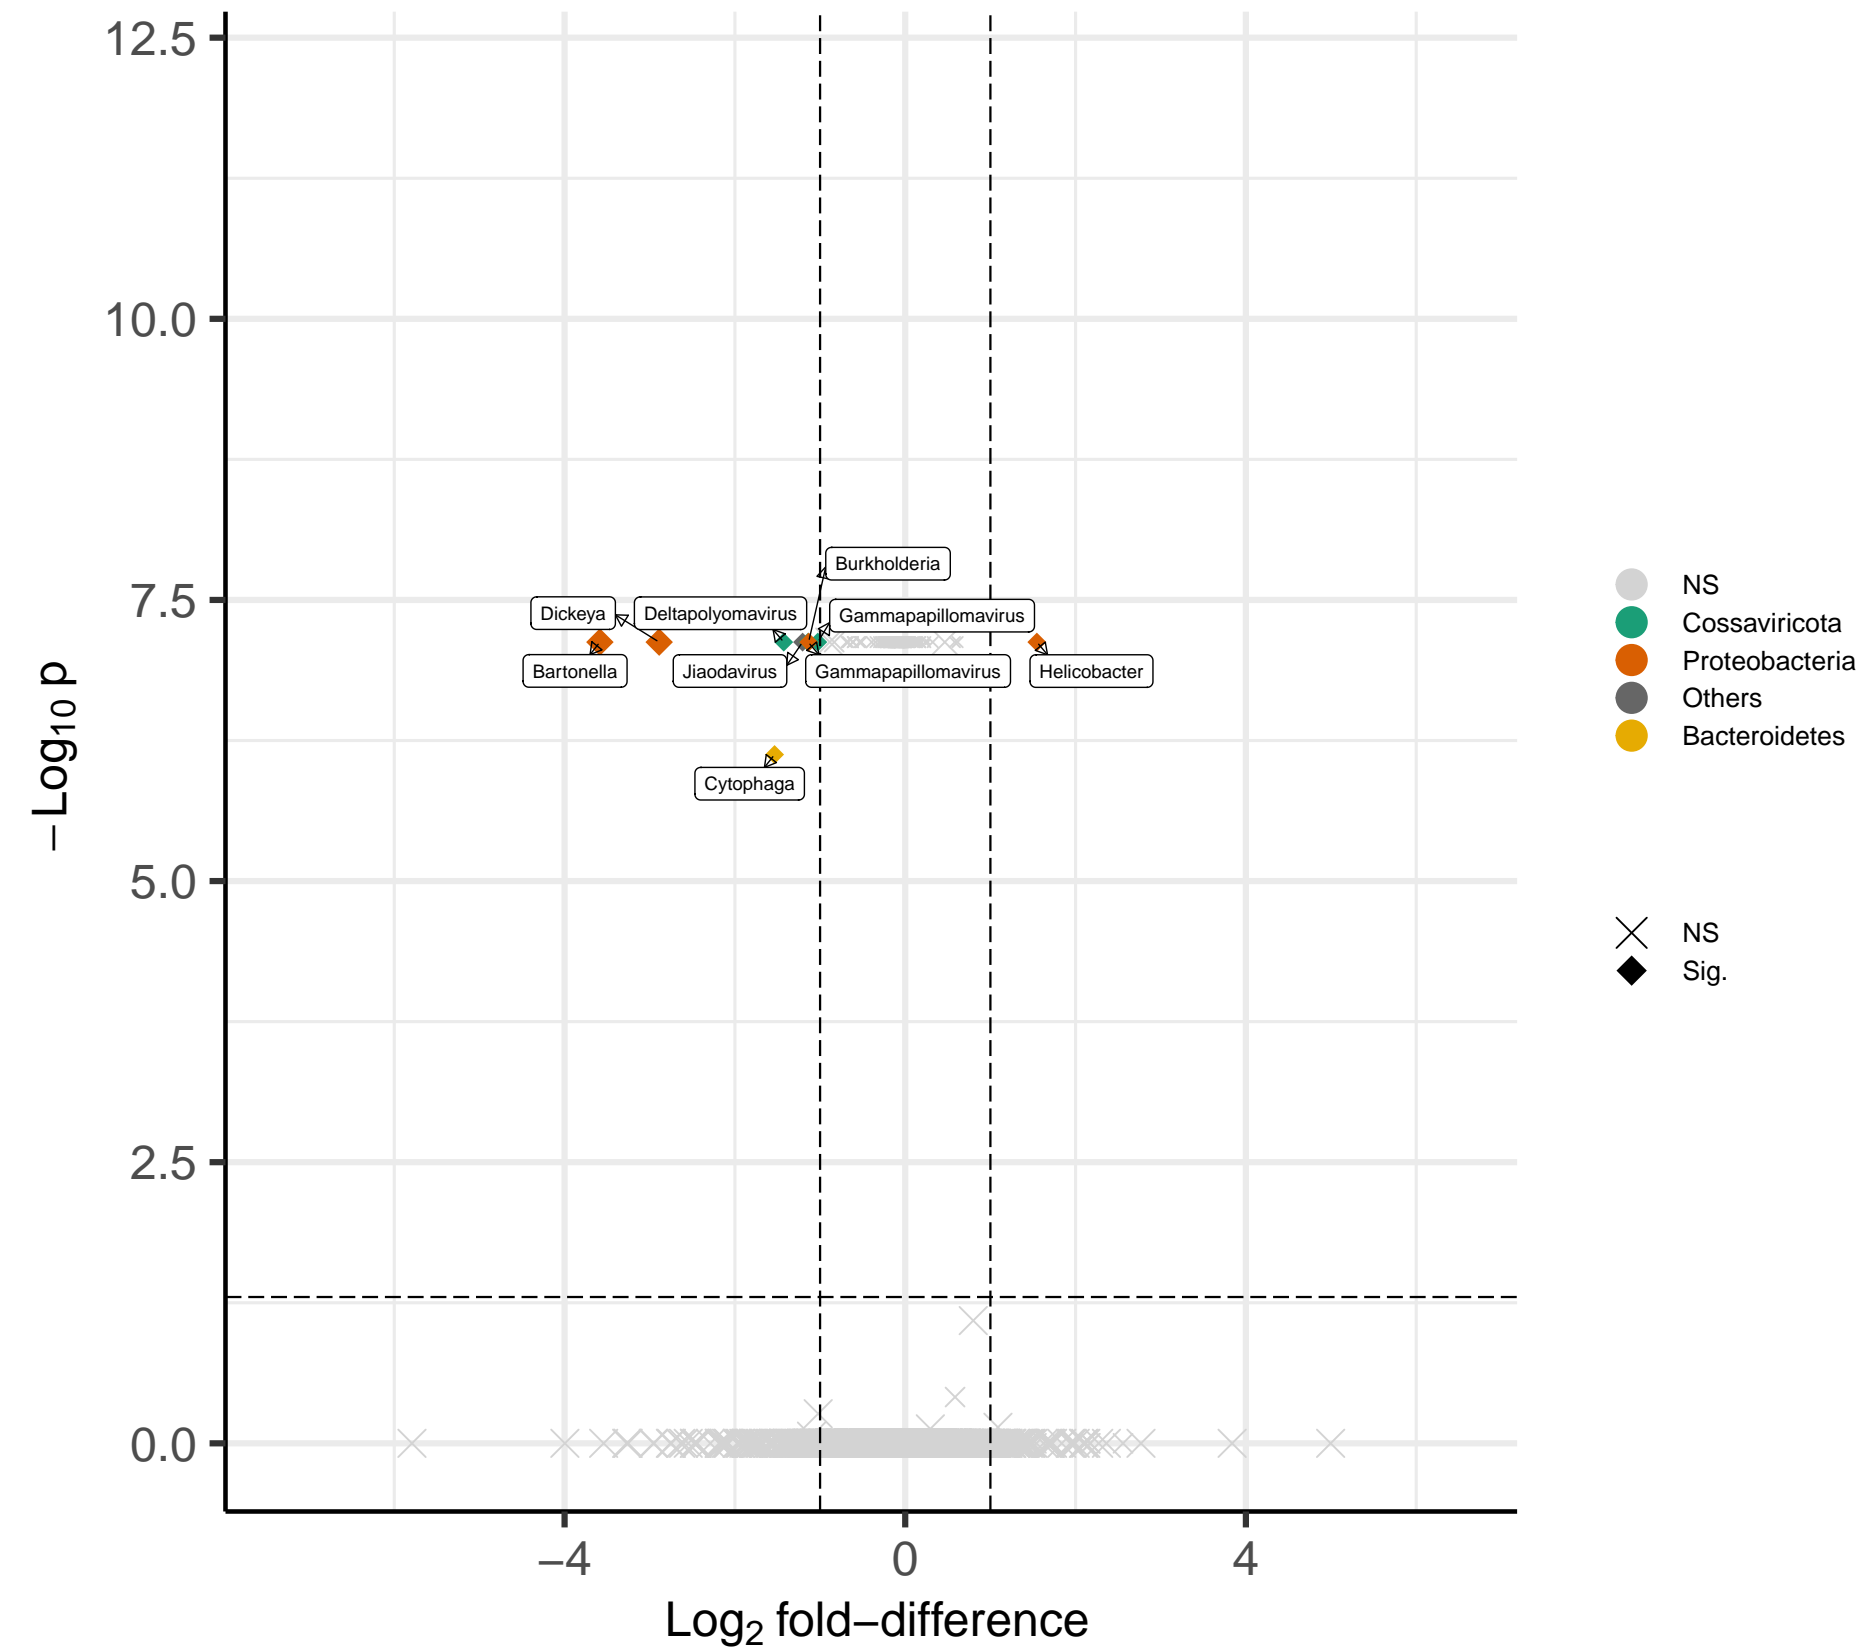

# Fall (vs. other seasons combined)

8 Sig. DA taxa

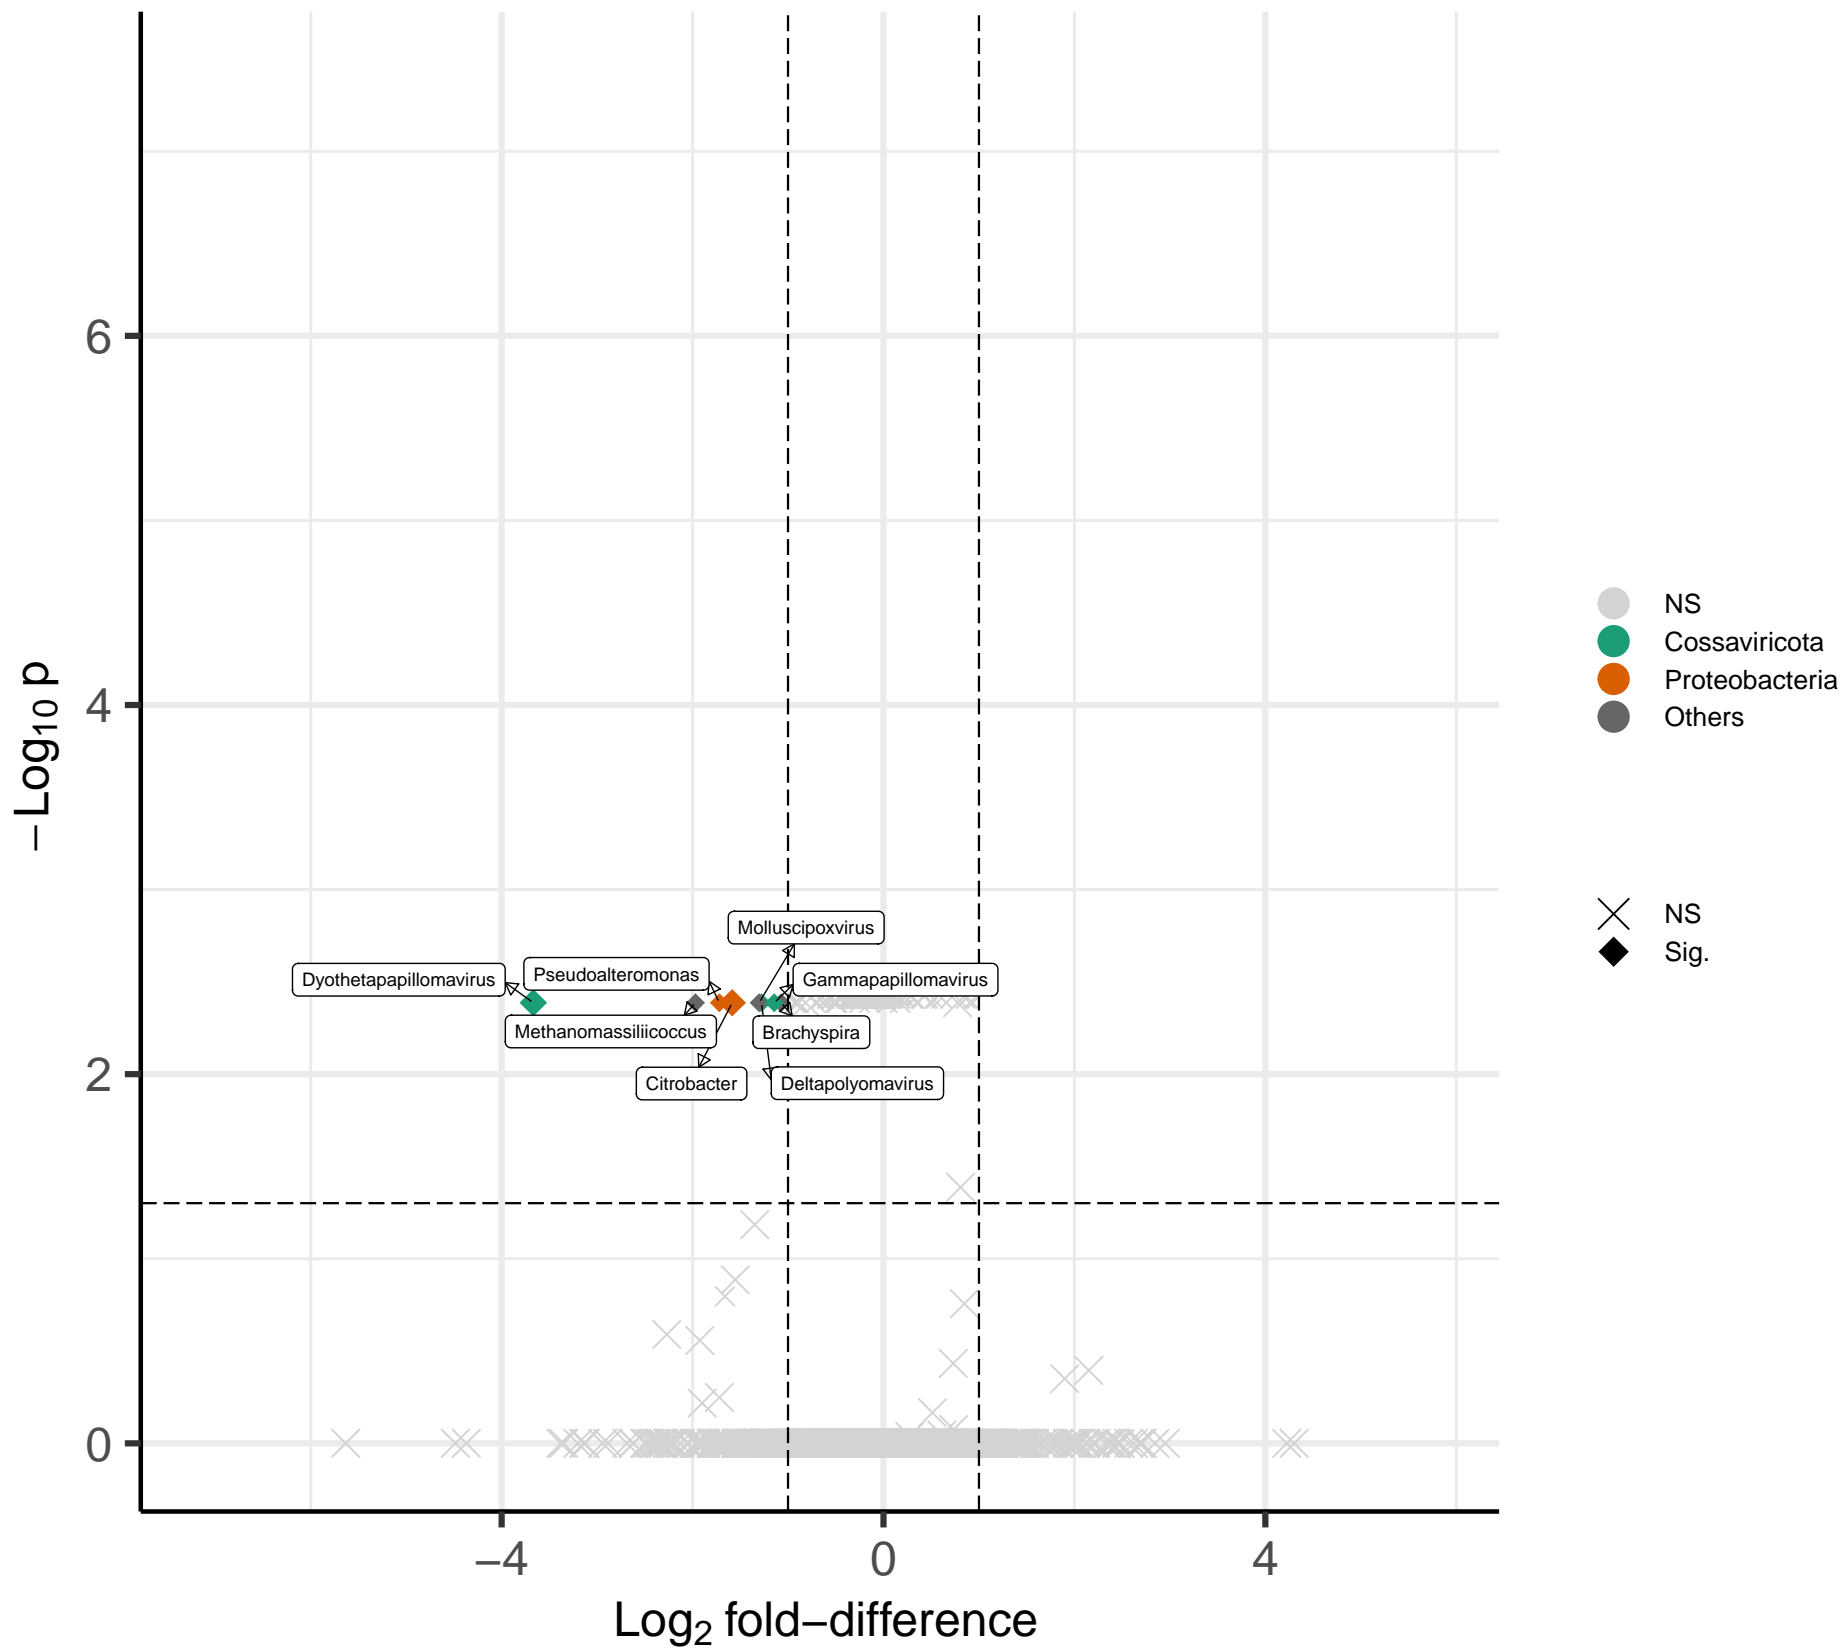



# Winter (vs. other seasons combined)

6 Sig. DA taxa

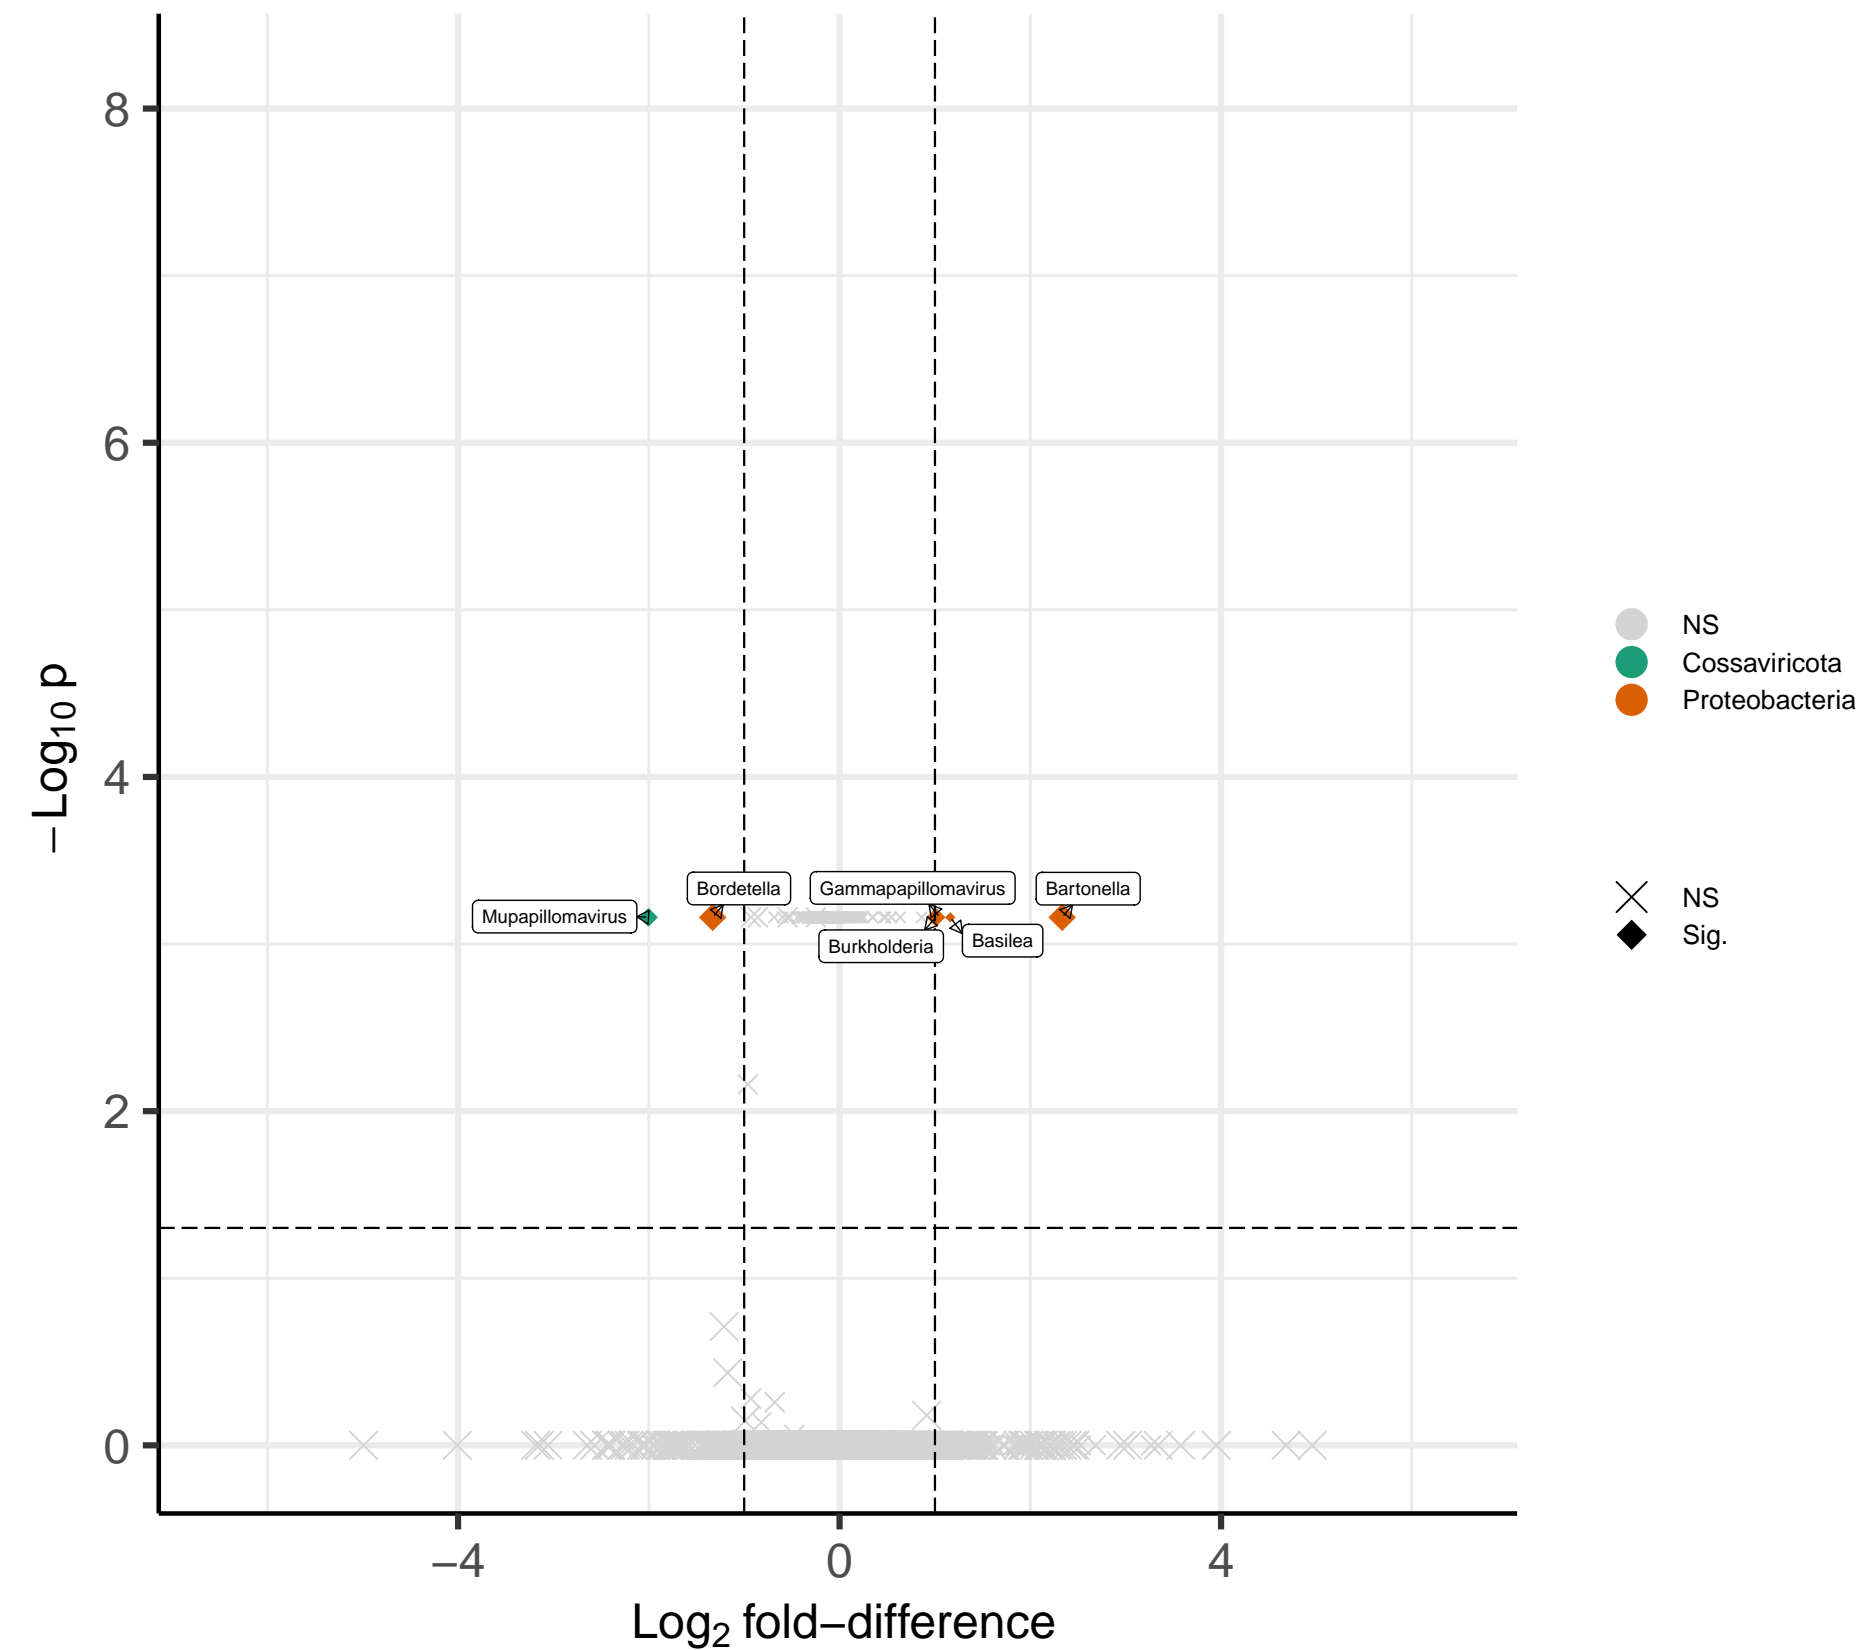

Supplement: Image_6.pdf [file Image_6.pdf]
