# Supplementary material for: Metagenomics reveals novel microbial signatures of farm exposures in house dust
Source: PubMed Central journal article supplement (PMC10321240; doi:10.3389/fmicb.2023.1202194), 2023-06-21

# Gender, Male (vs. Female)

1 Sig. DA taxa

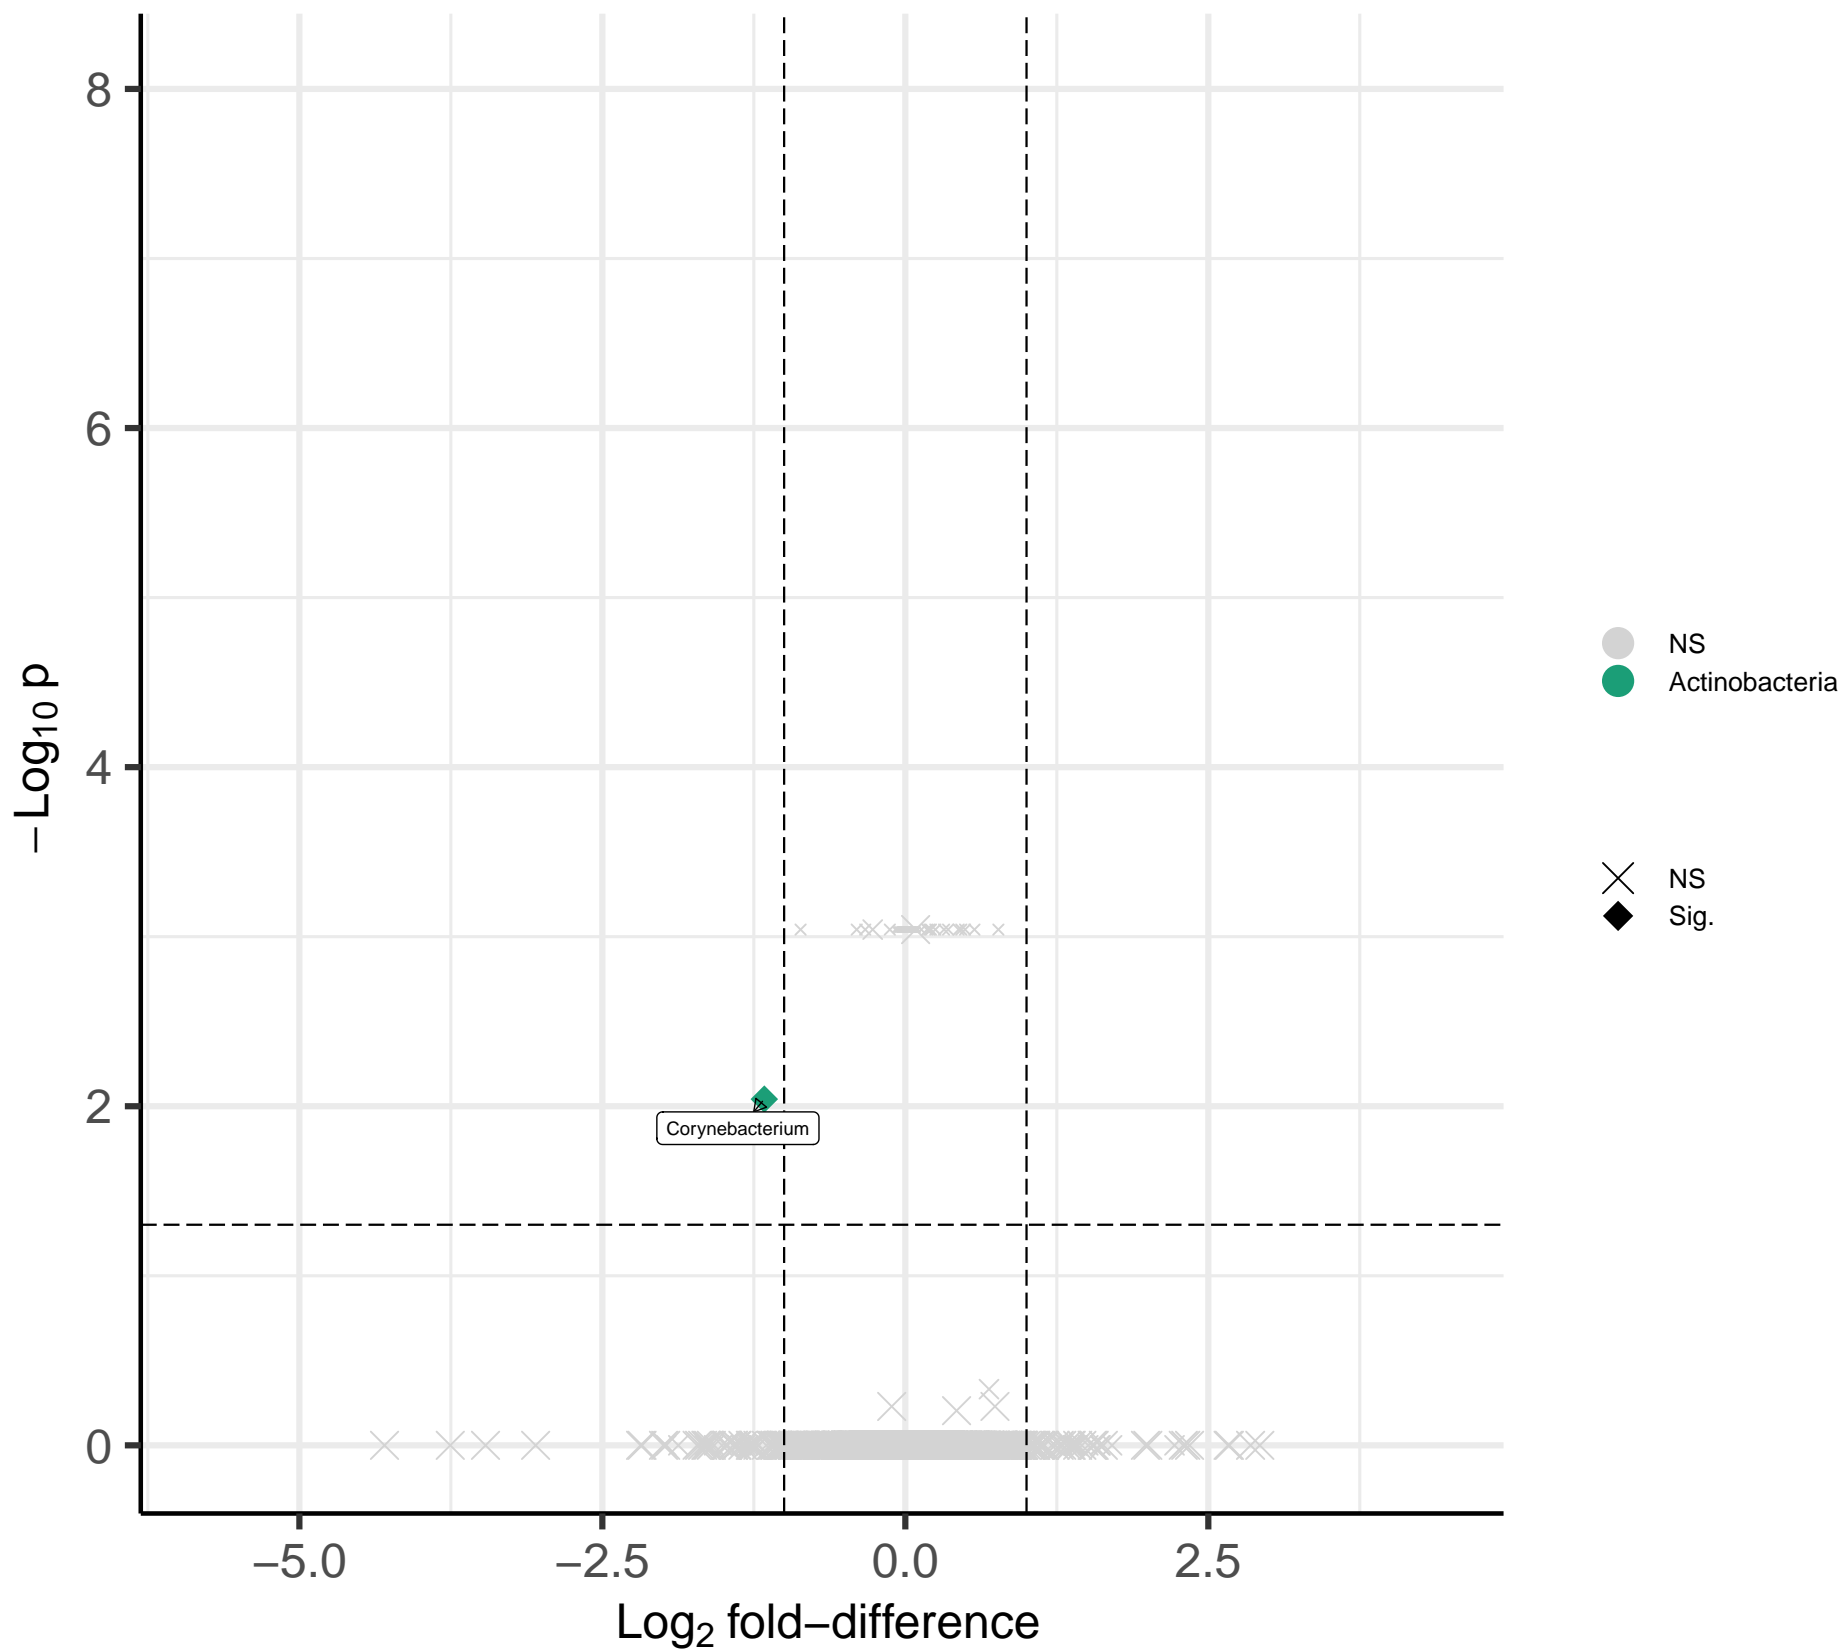





# Cats (vs. no cats)

25 Sig. DA taxa

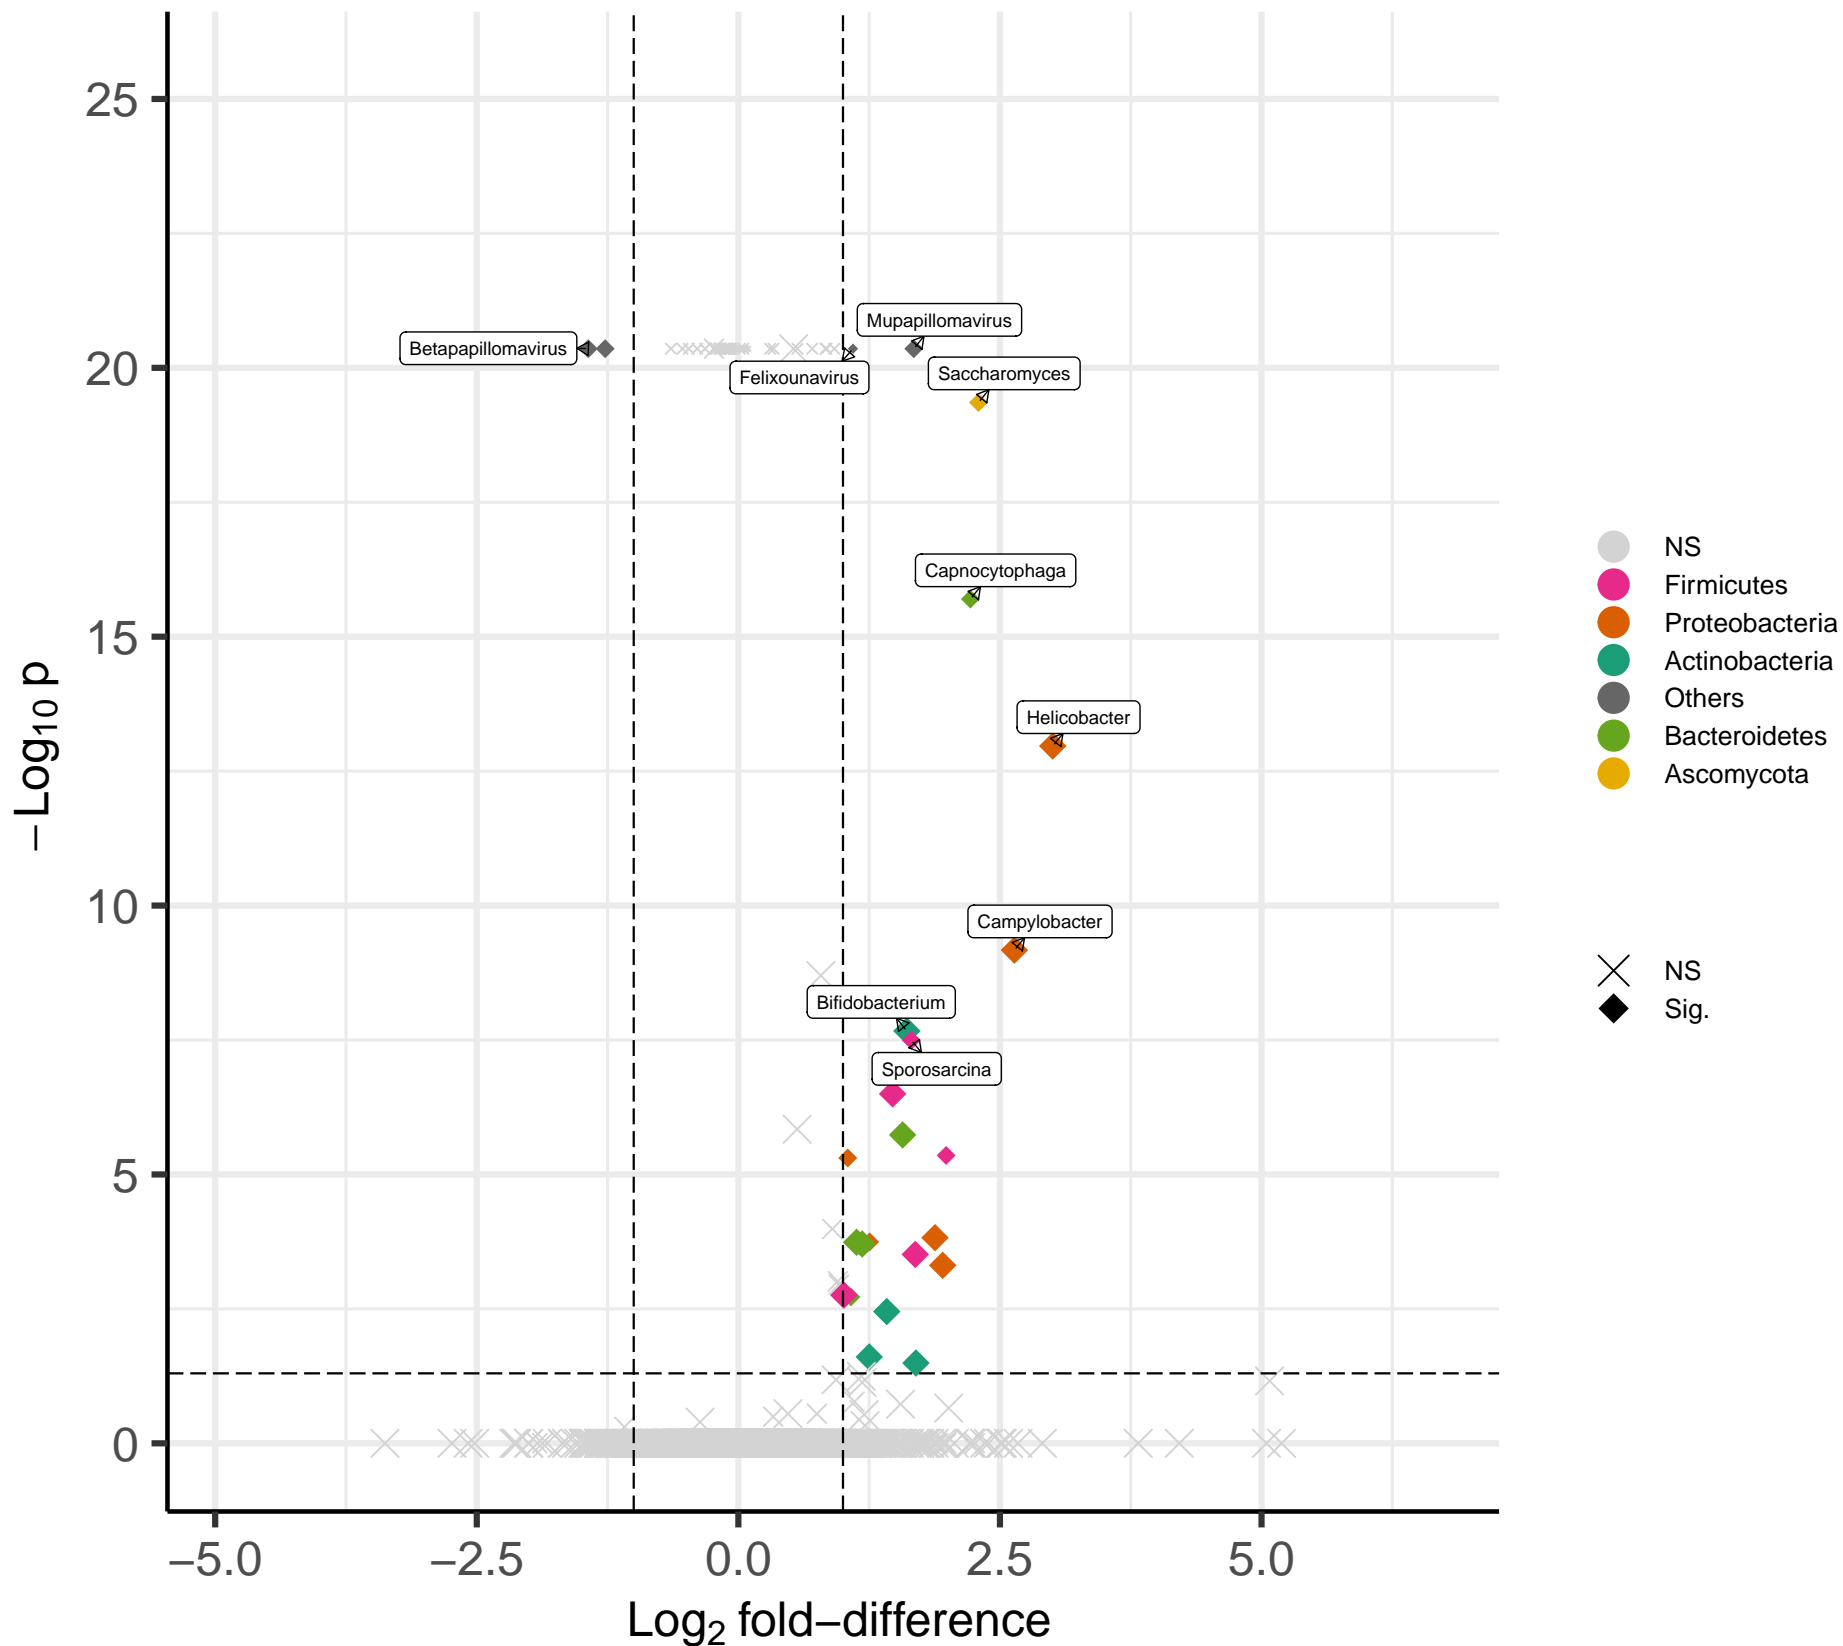

# Home condition, higher category (vs. lower category)

4 Sig. DA taxa

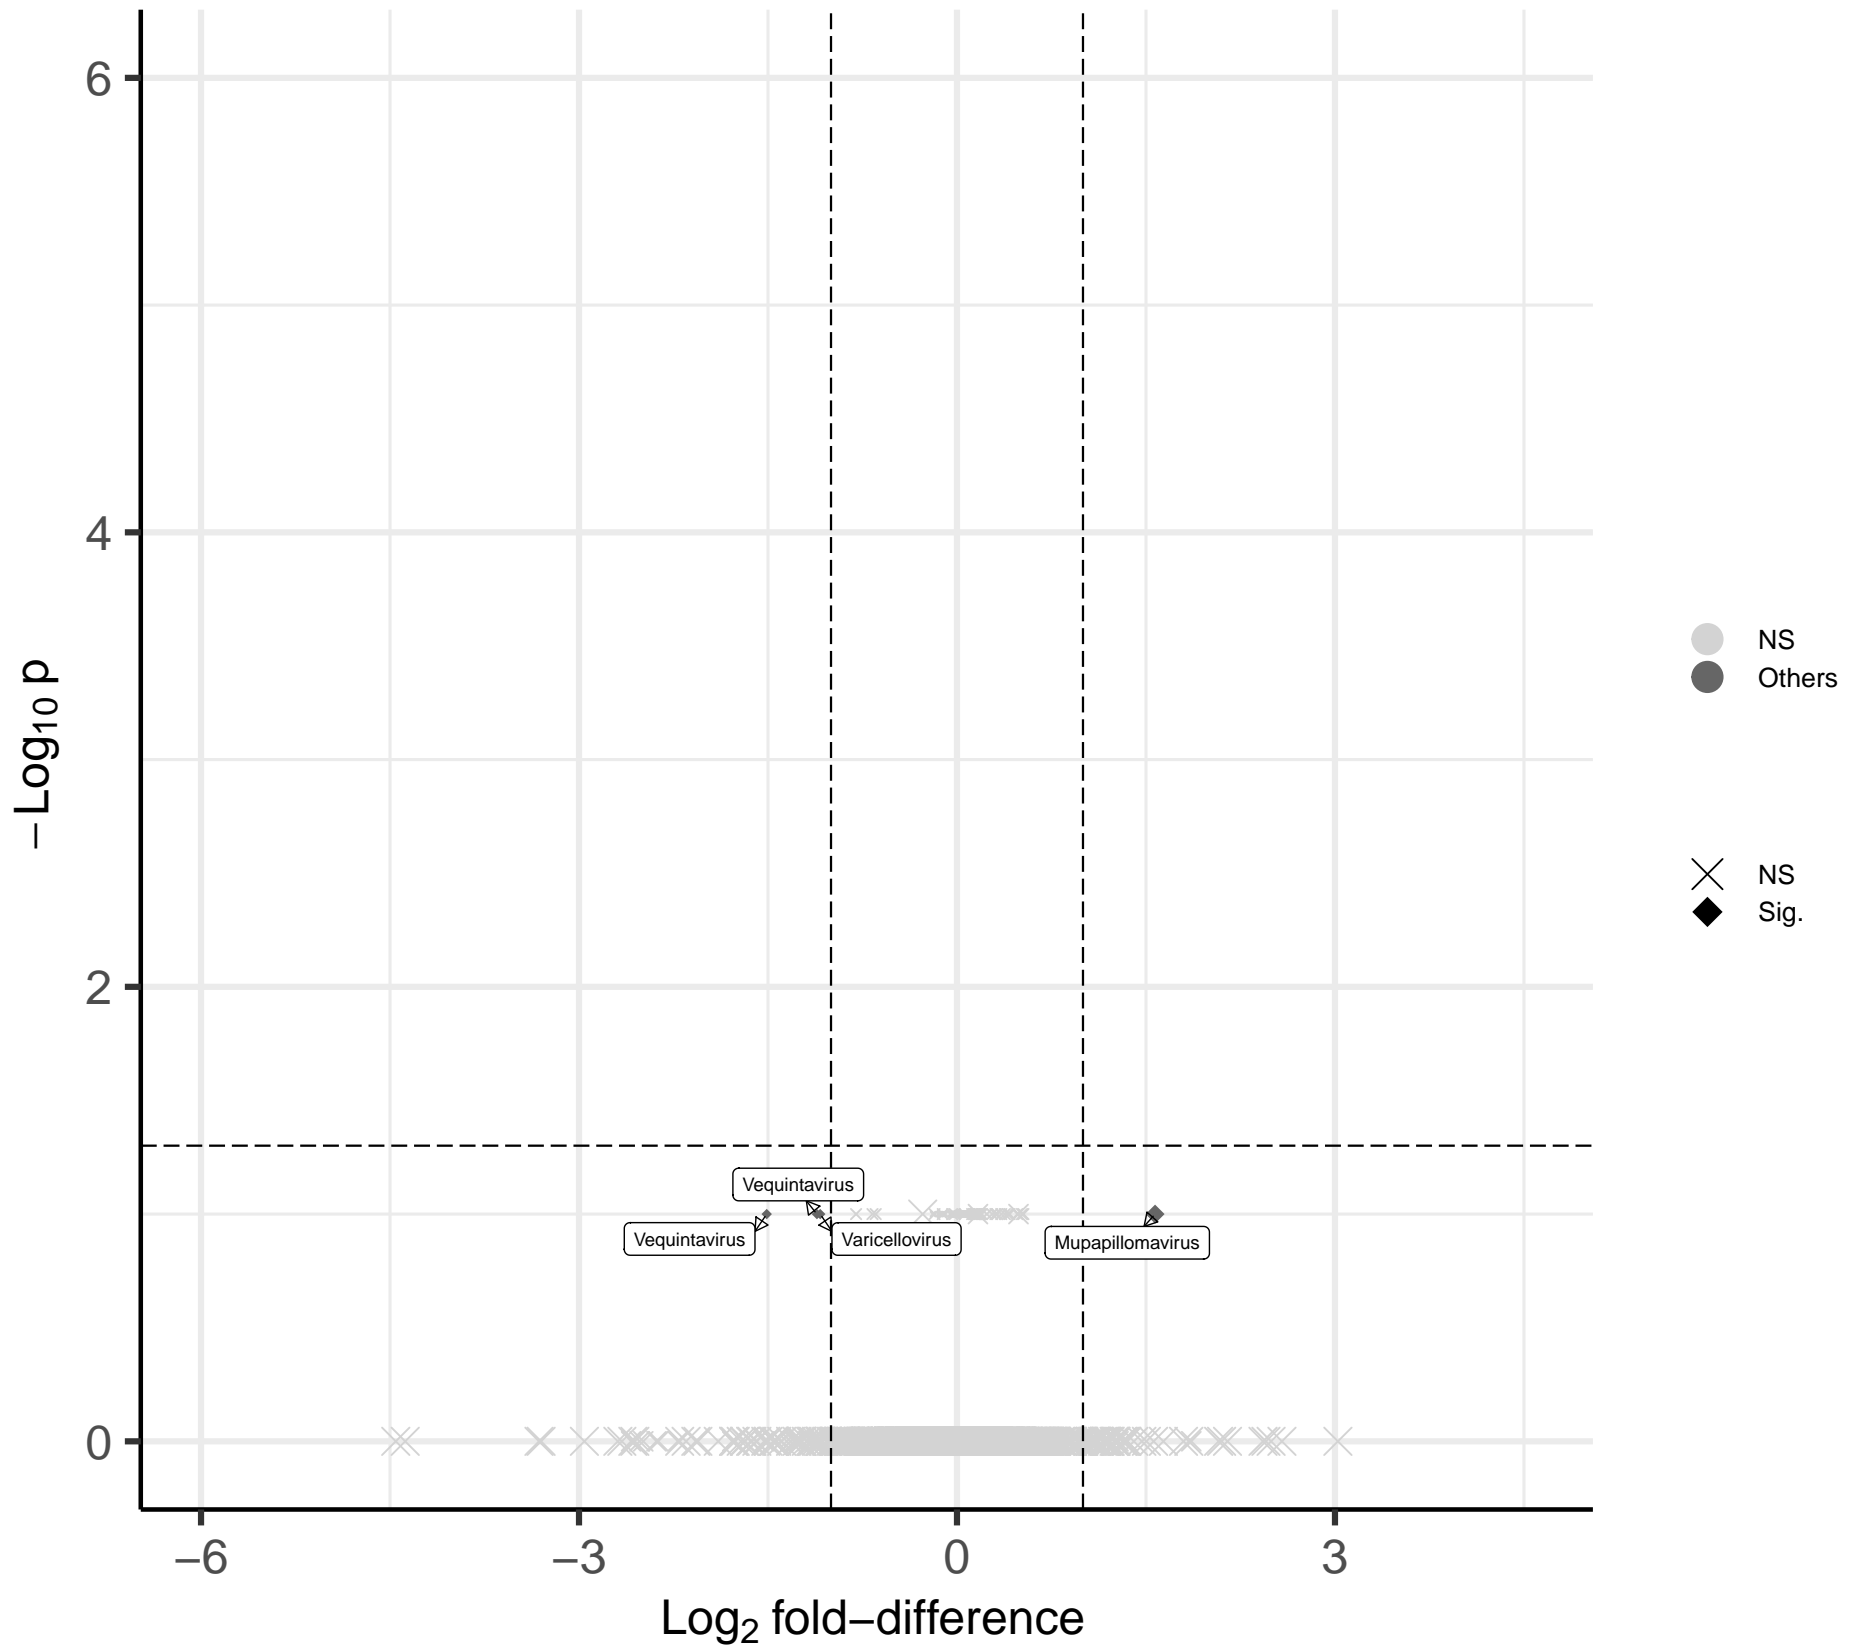

# Carpeting, carpeted surface (vs. smooth floor)

30 Sig. DA taxa

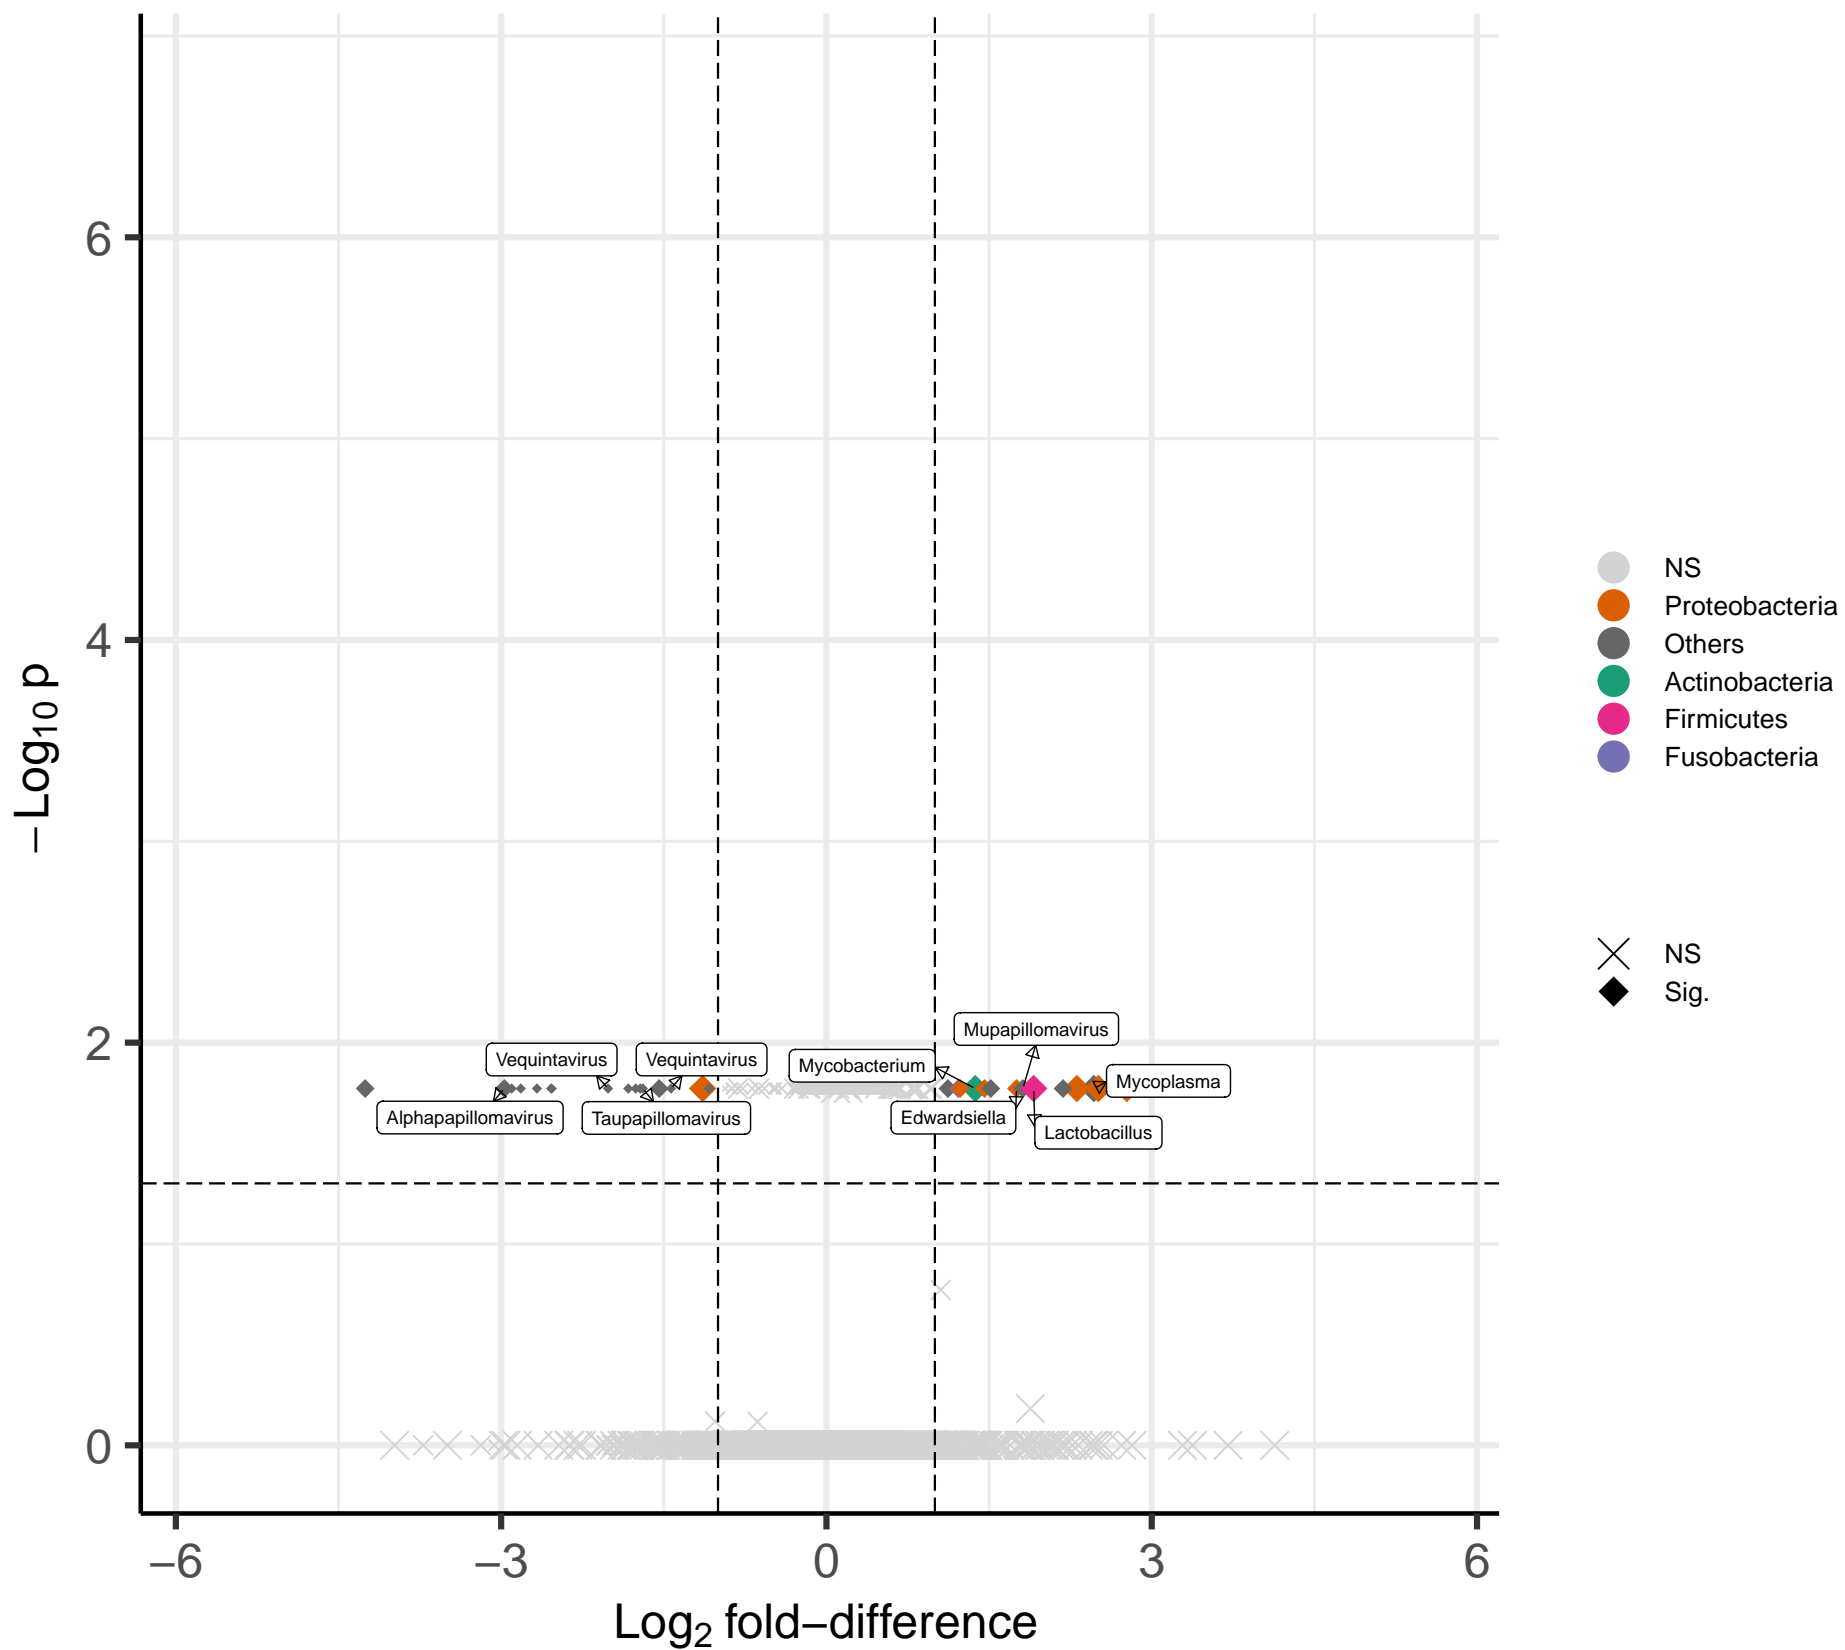

# Living on a farm (vs. not living on a farm)

125 Sig. DA taxa

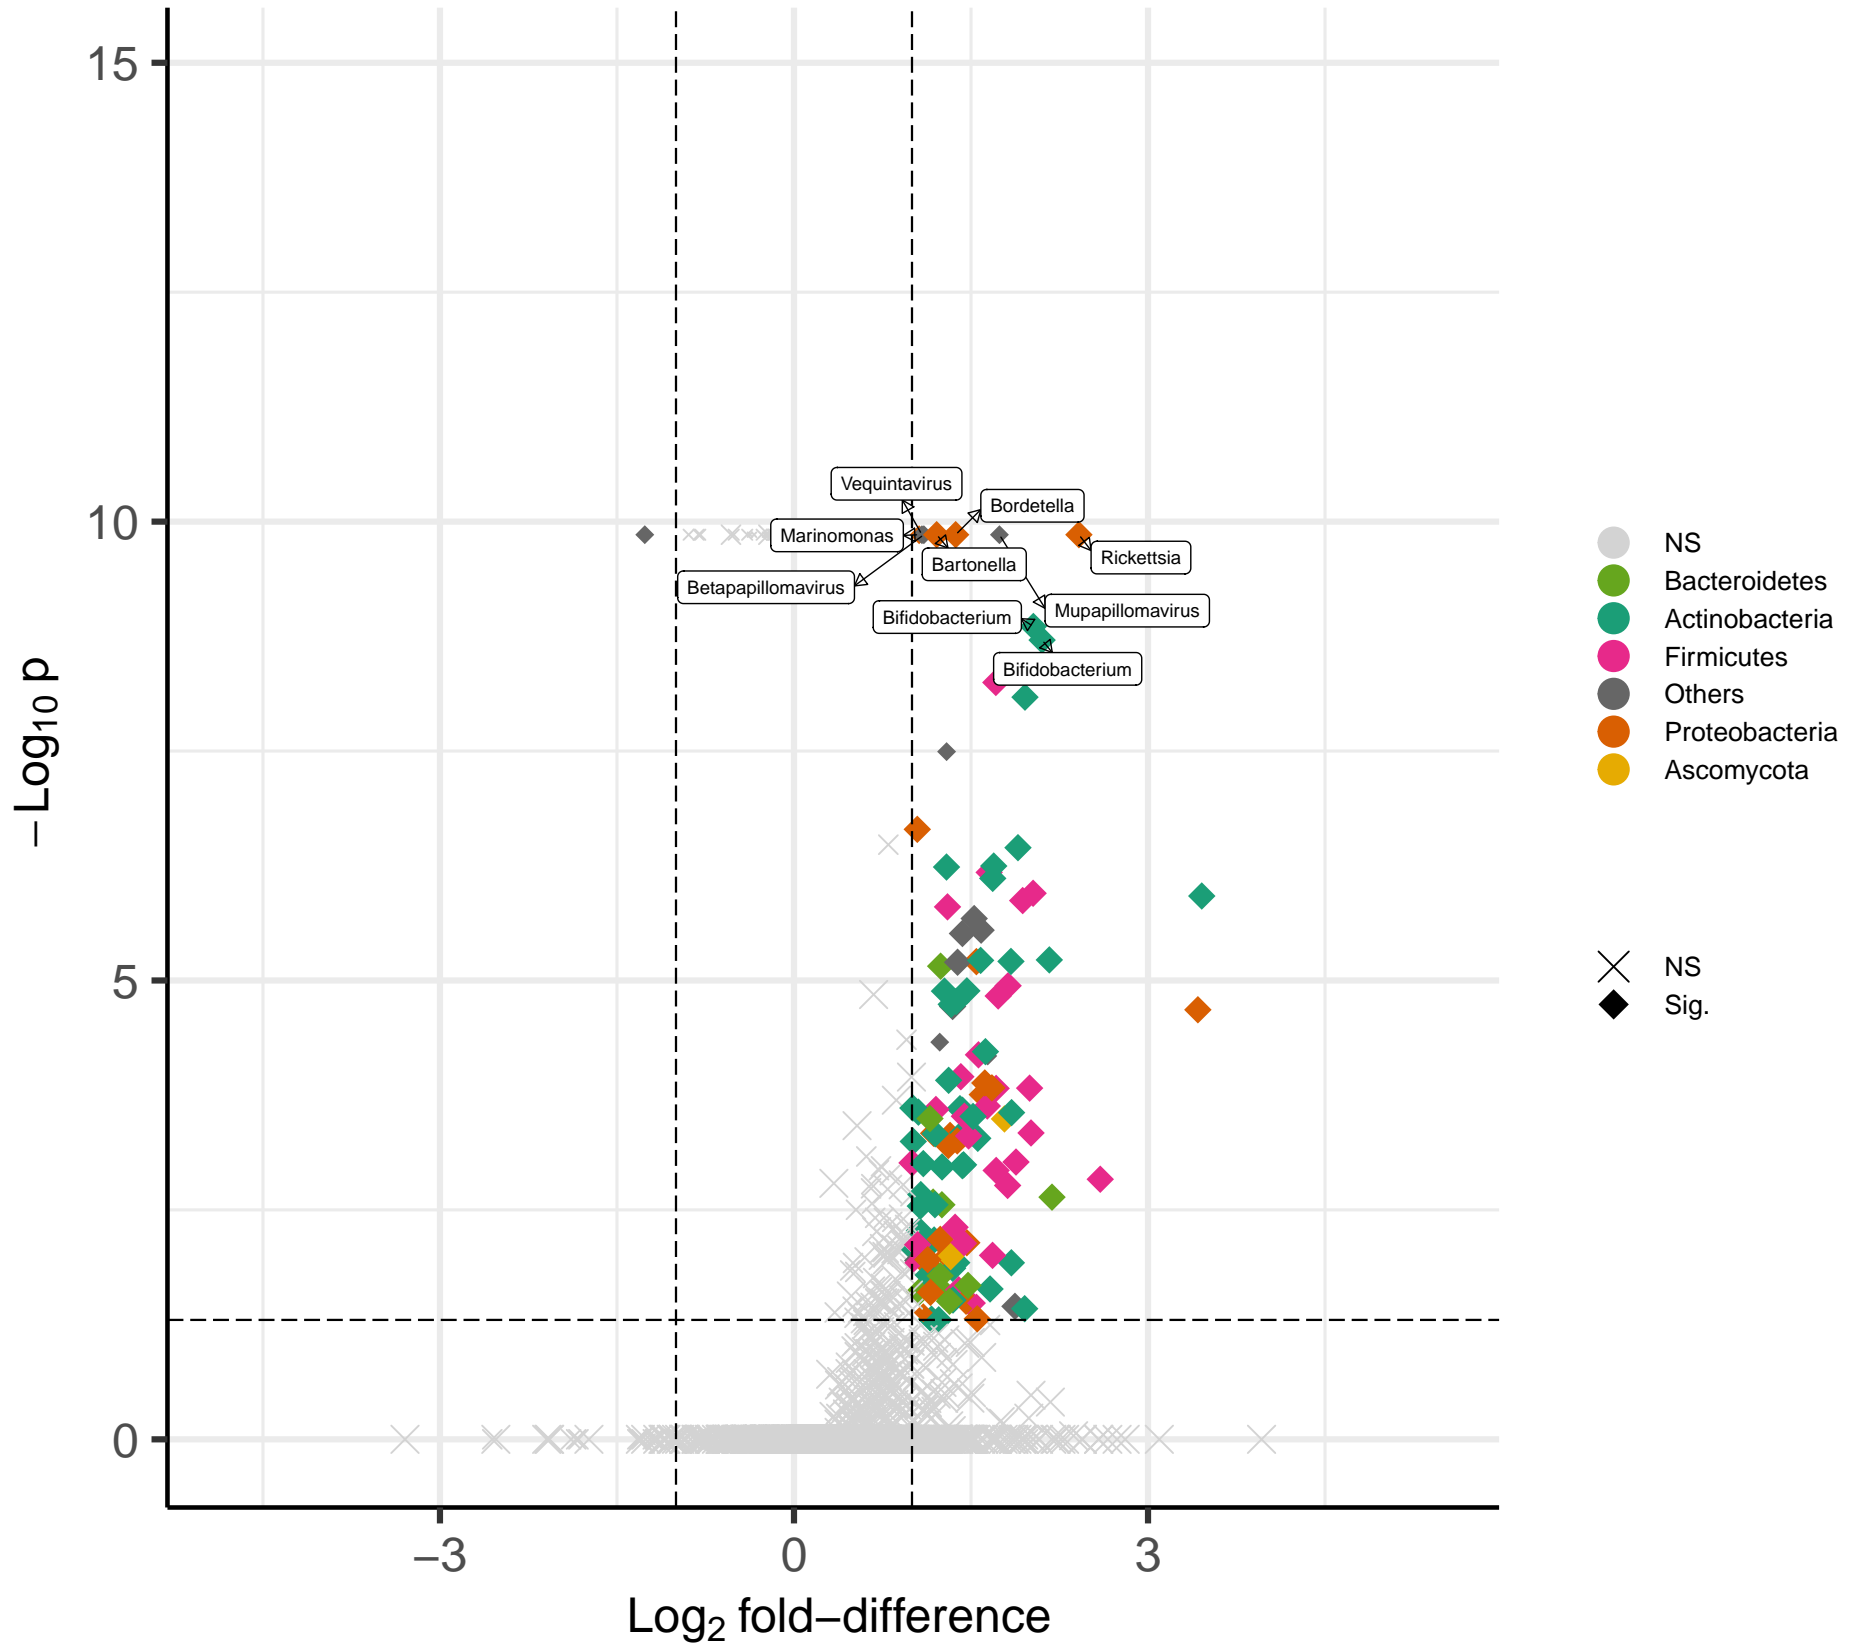

# Crop farming (vs. no crop farming)

24 Sig. DA taxa

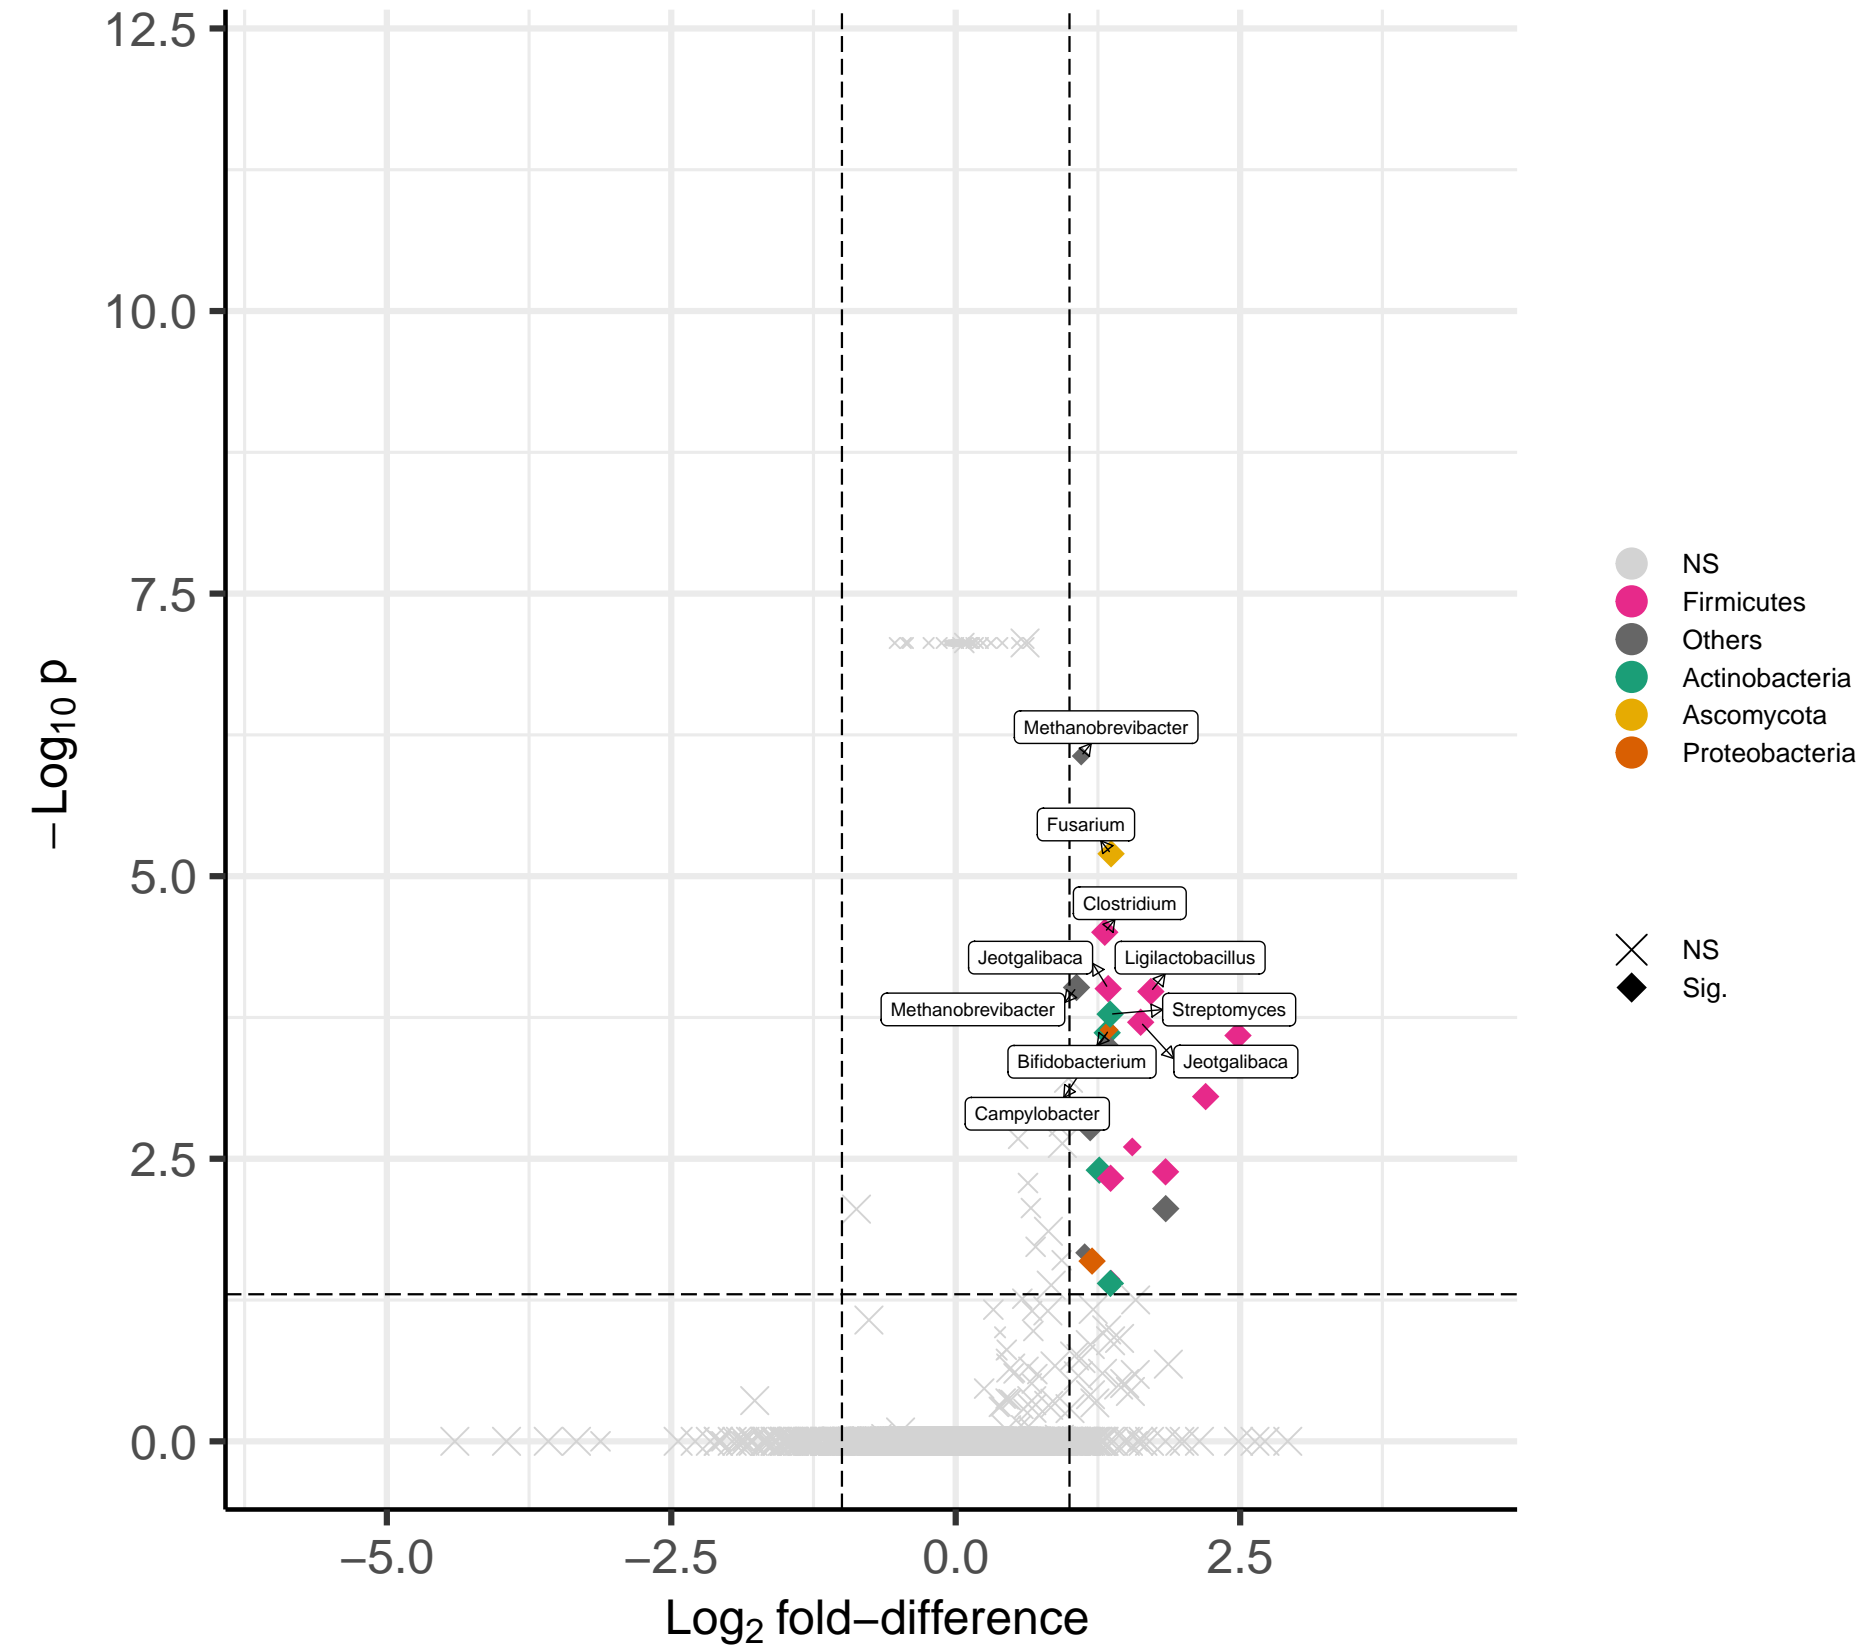



# Animal farming (vs. no animal farming)

238 Sig. DA taxa

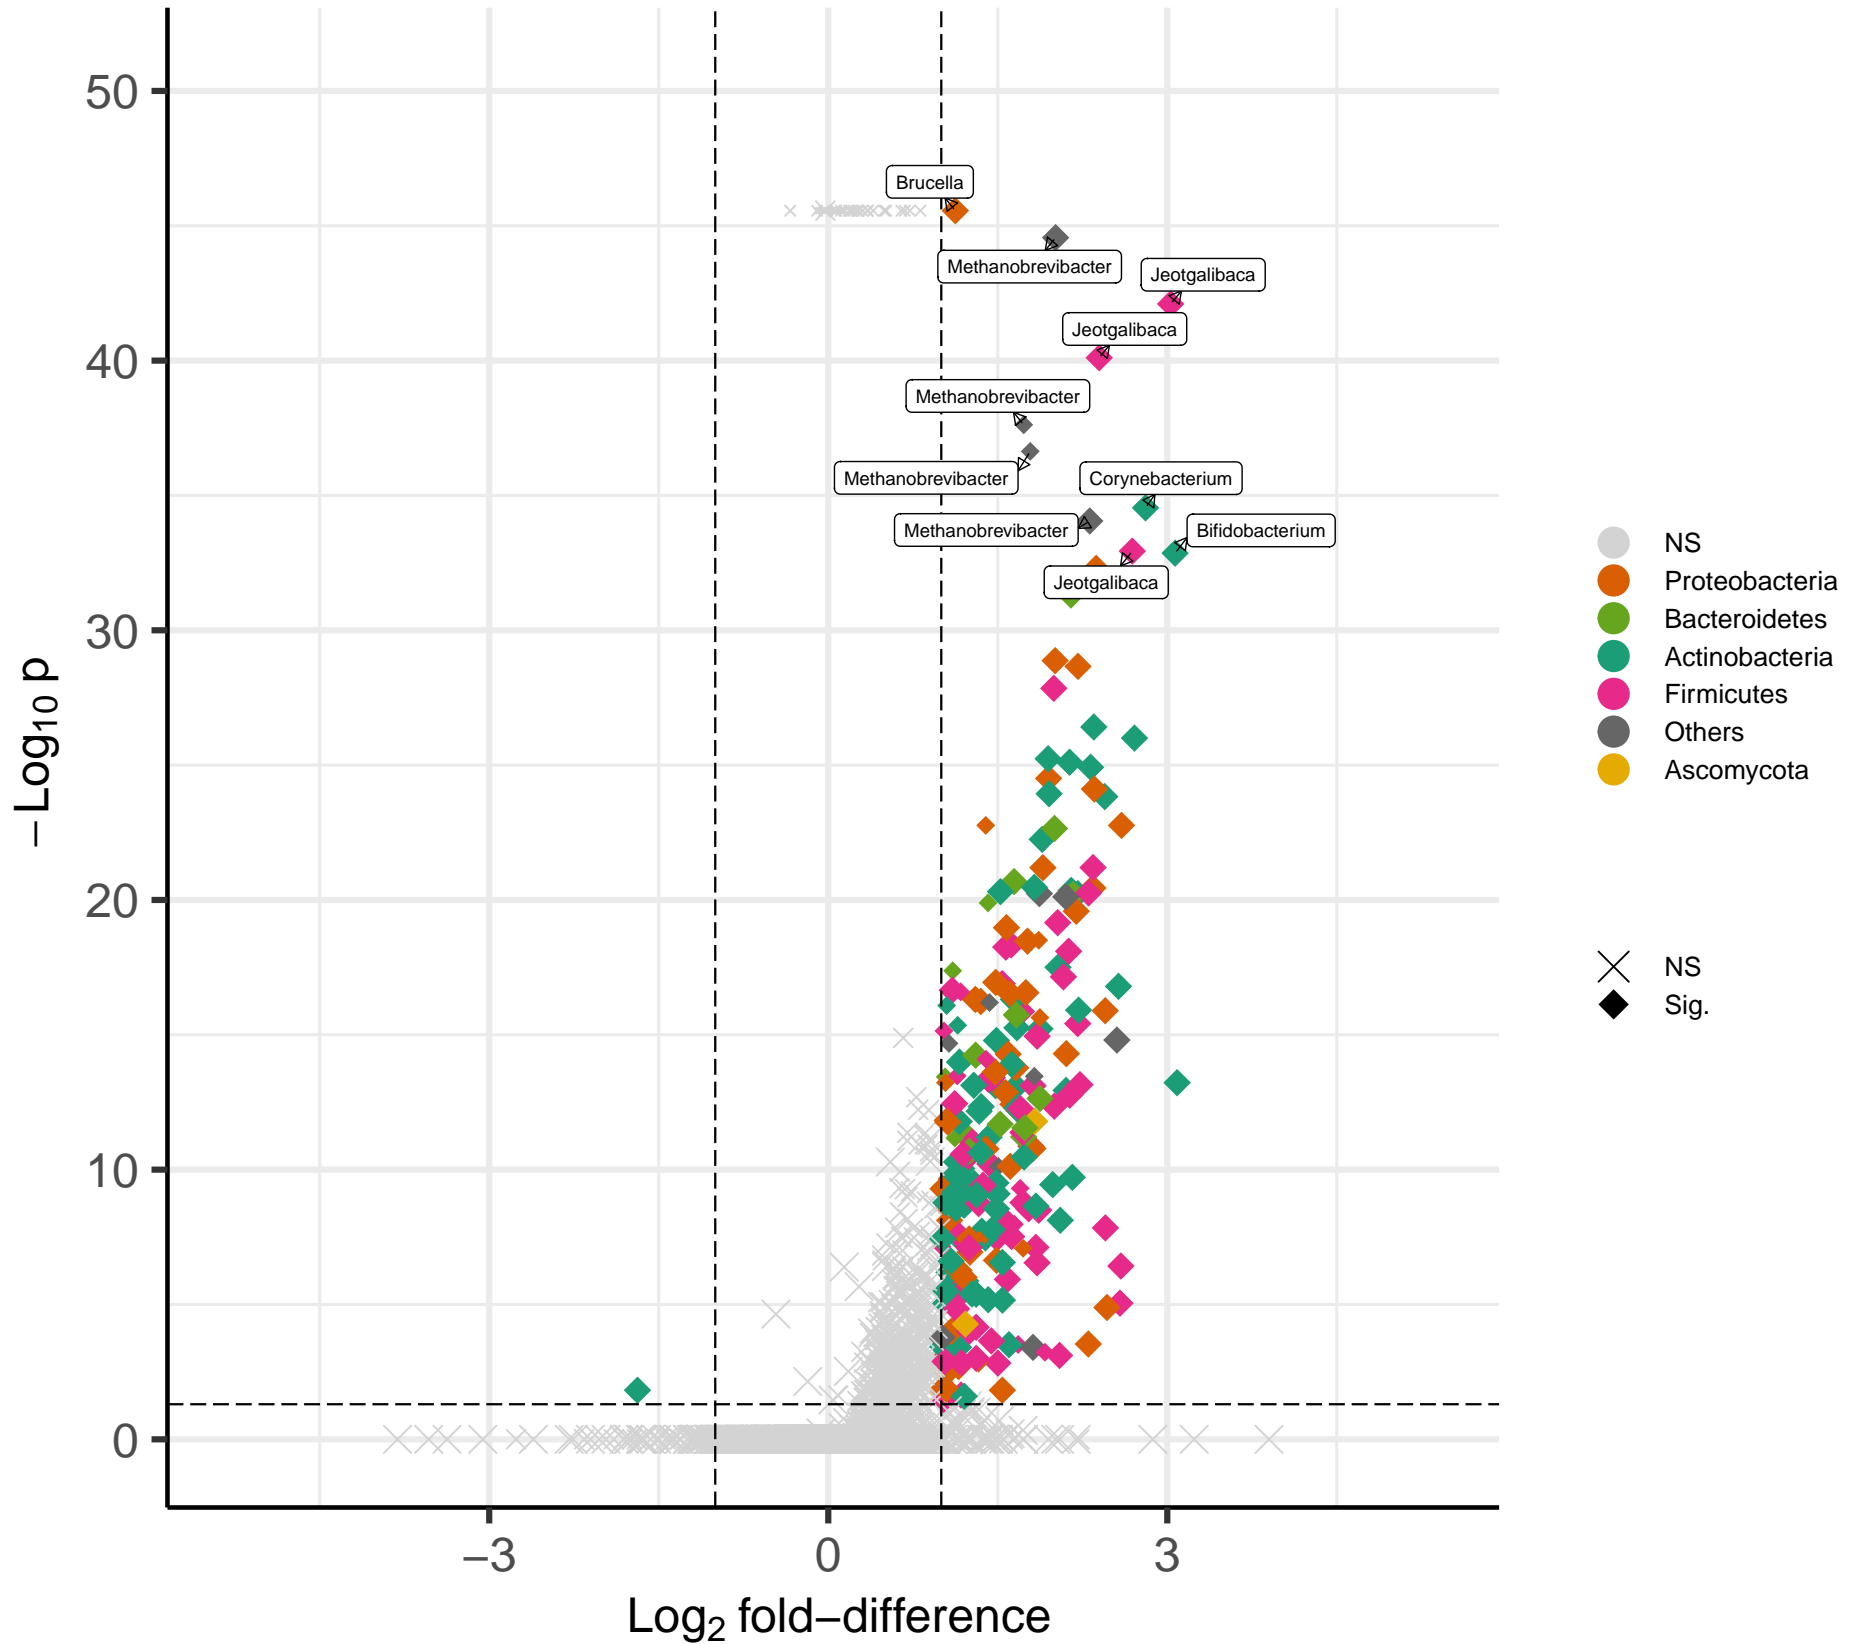

# Working with beef cattle (vs. no beef cattle)

110 Sig. DA taxa

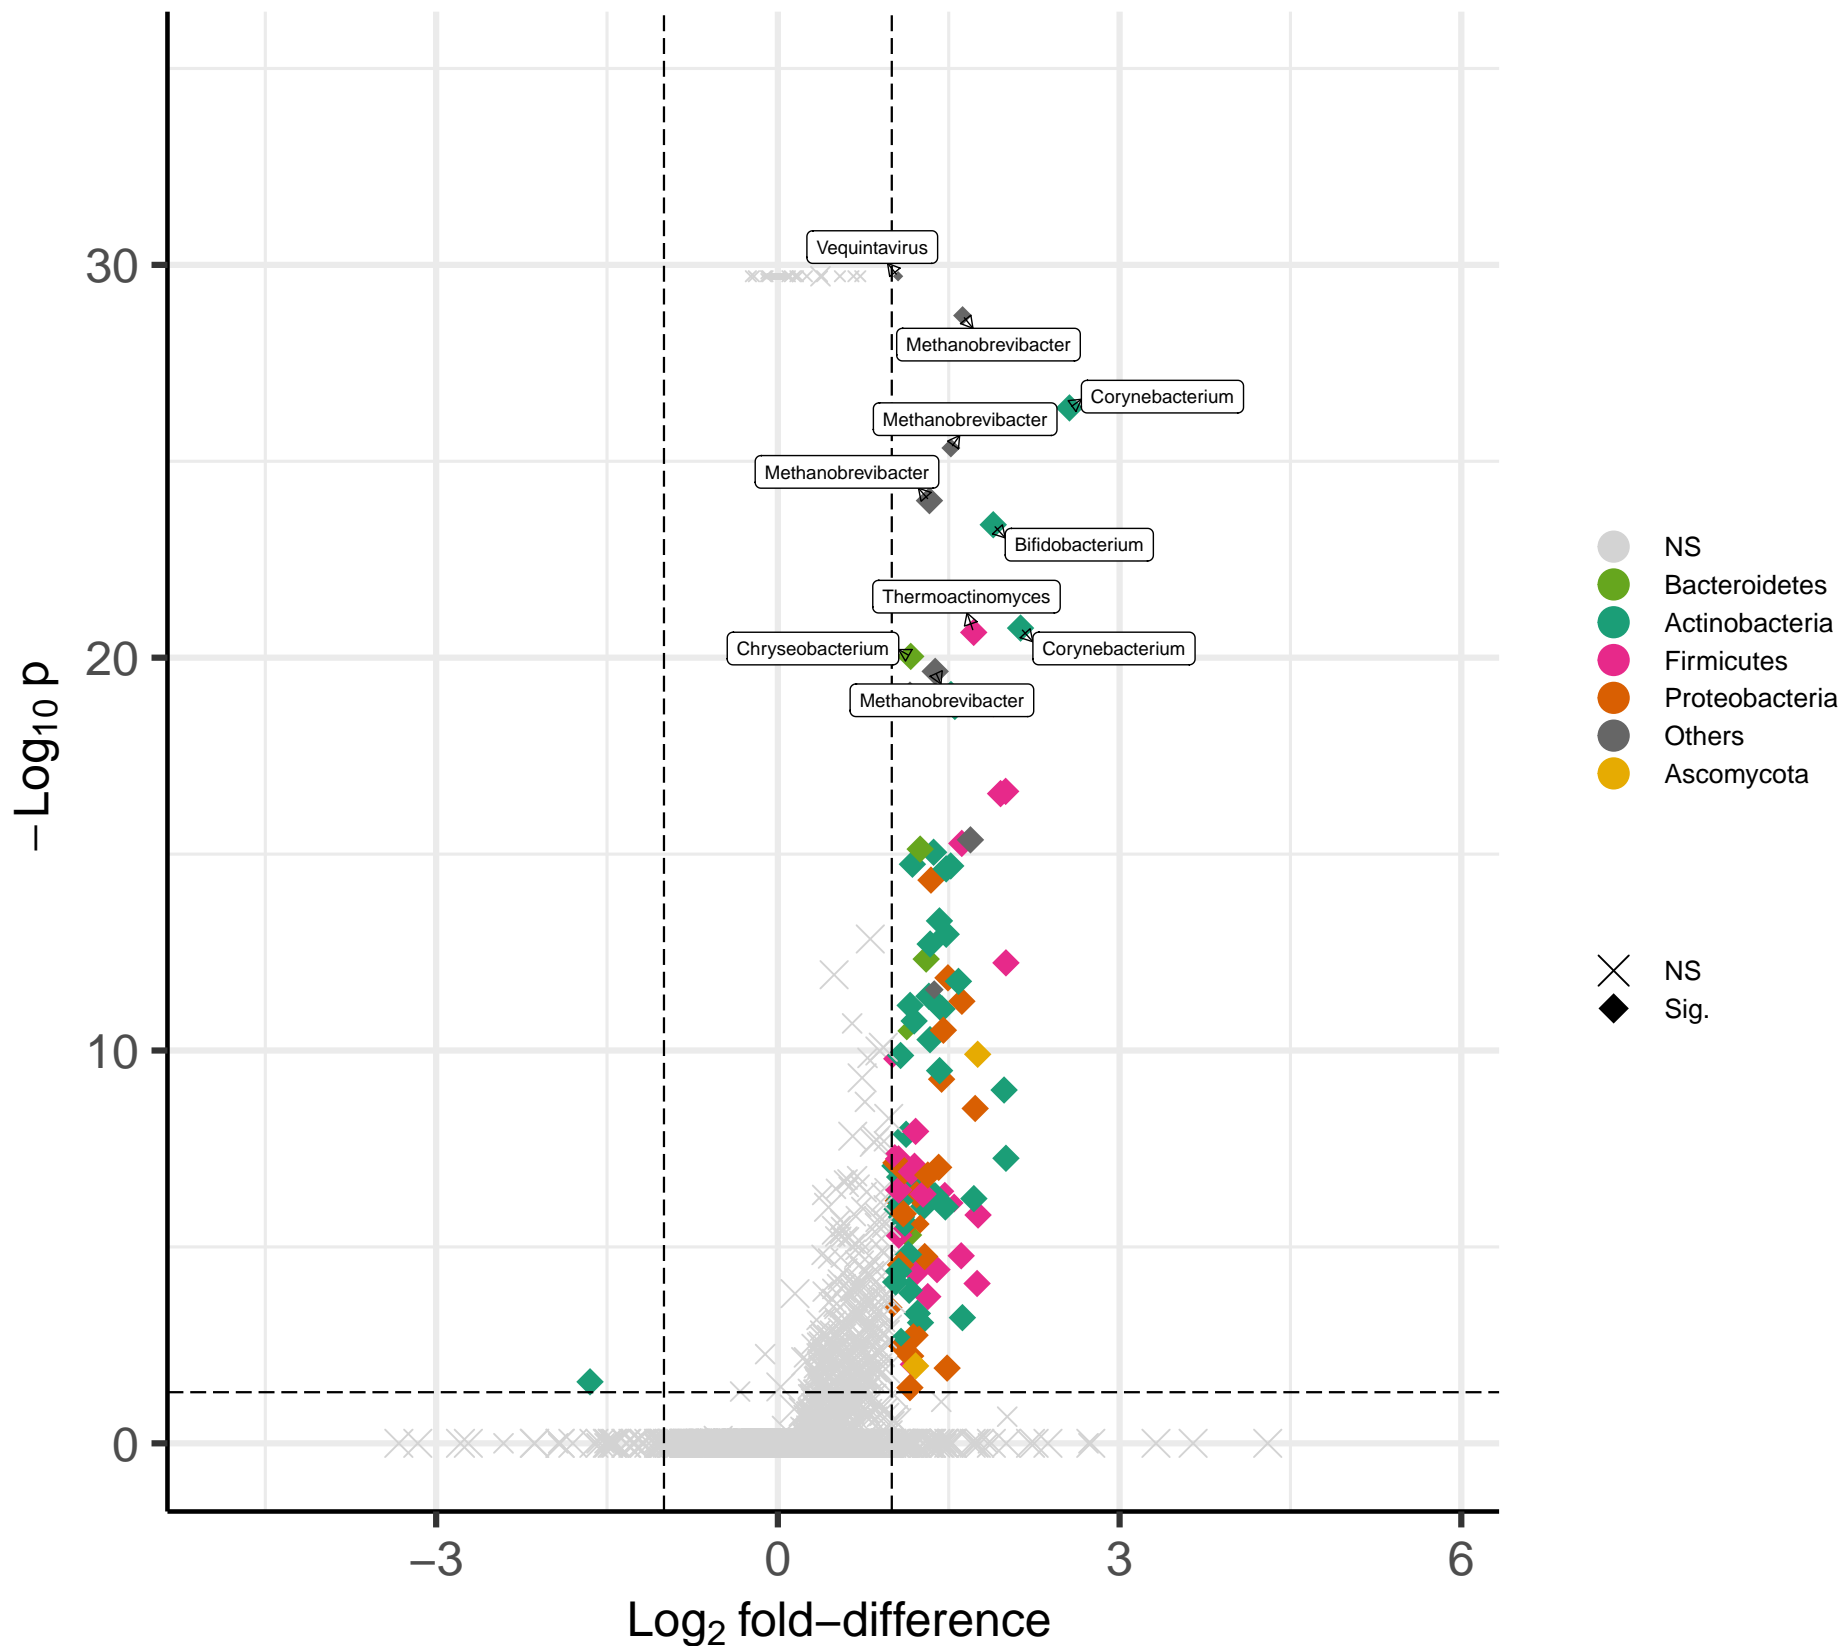

# Working with dairy cattle (vs. no dairy cattle)

23 Sig. DA taxa

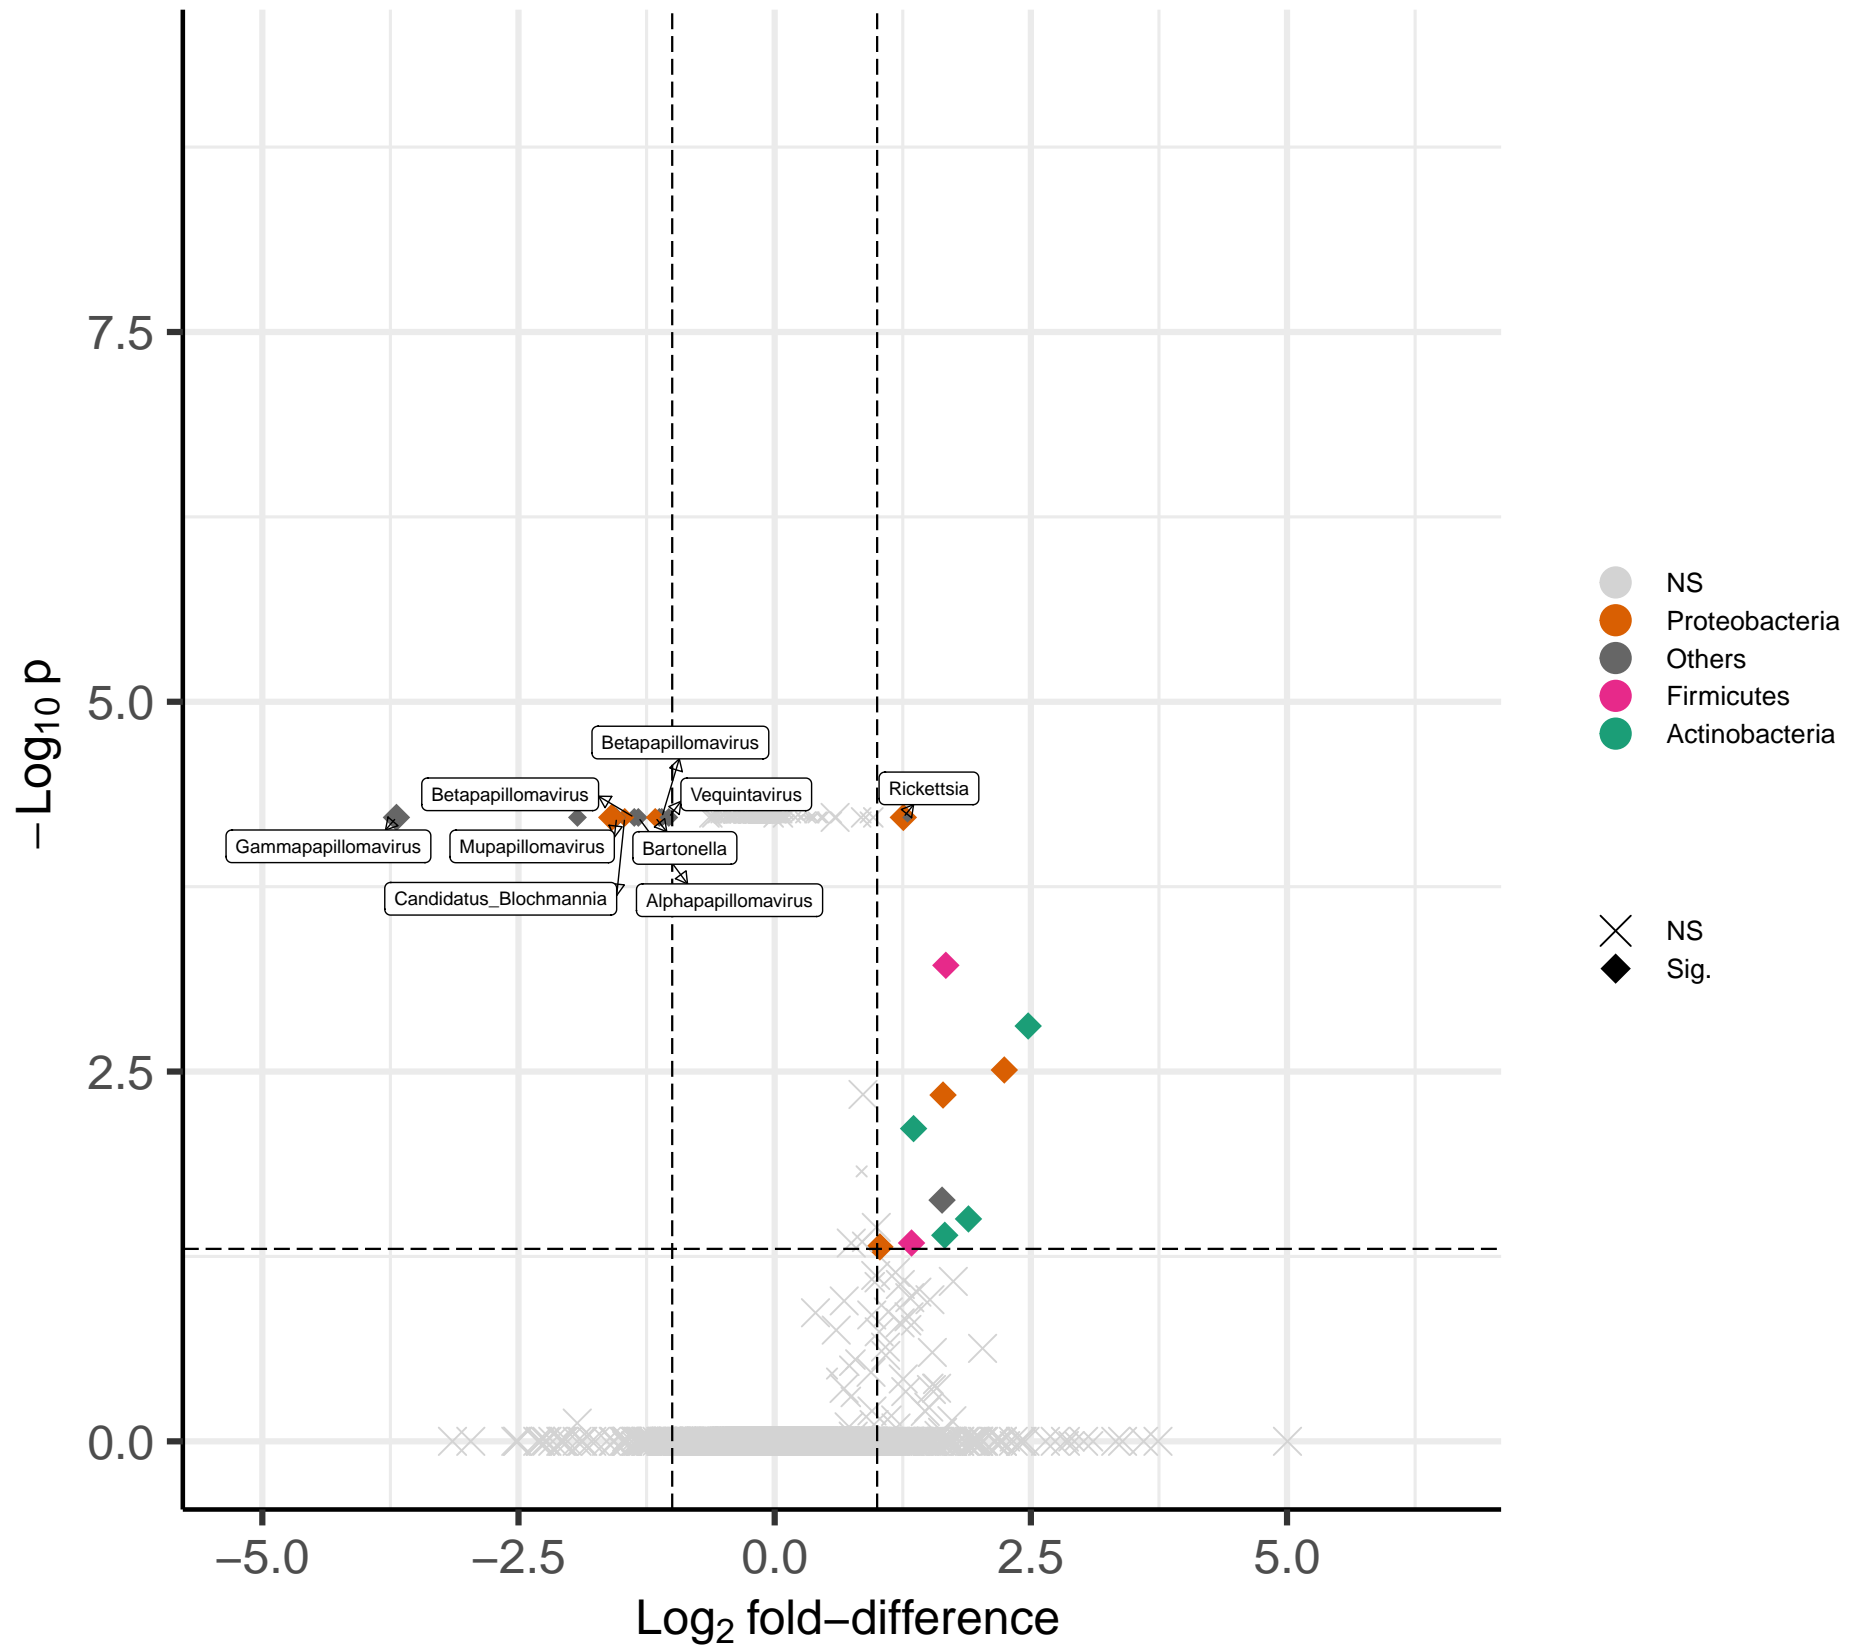

# Working with hogs (vs. no hogs)

121 Sig. DA taxa

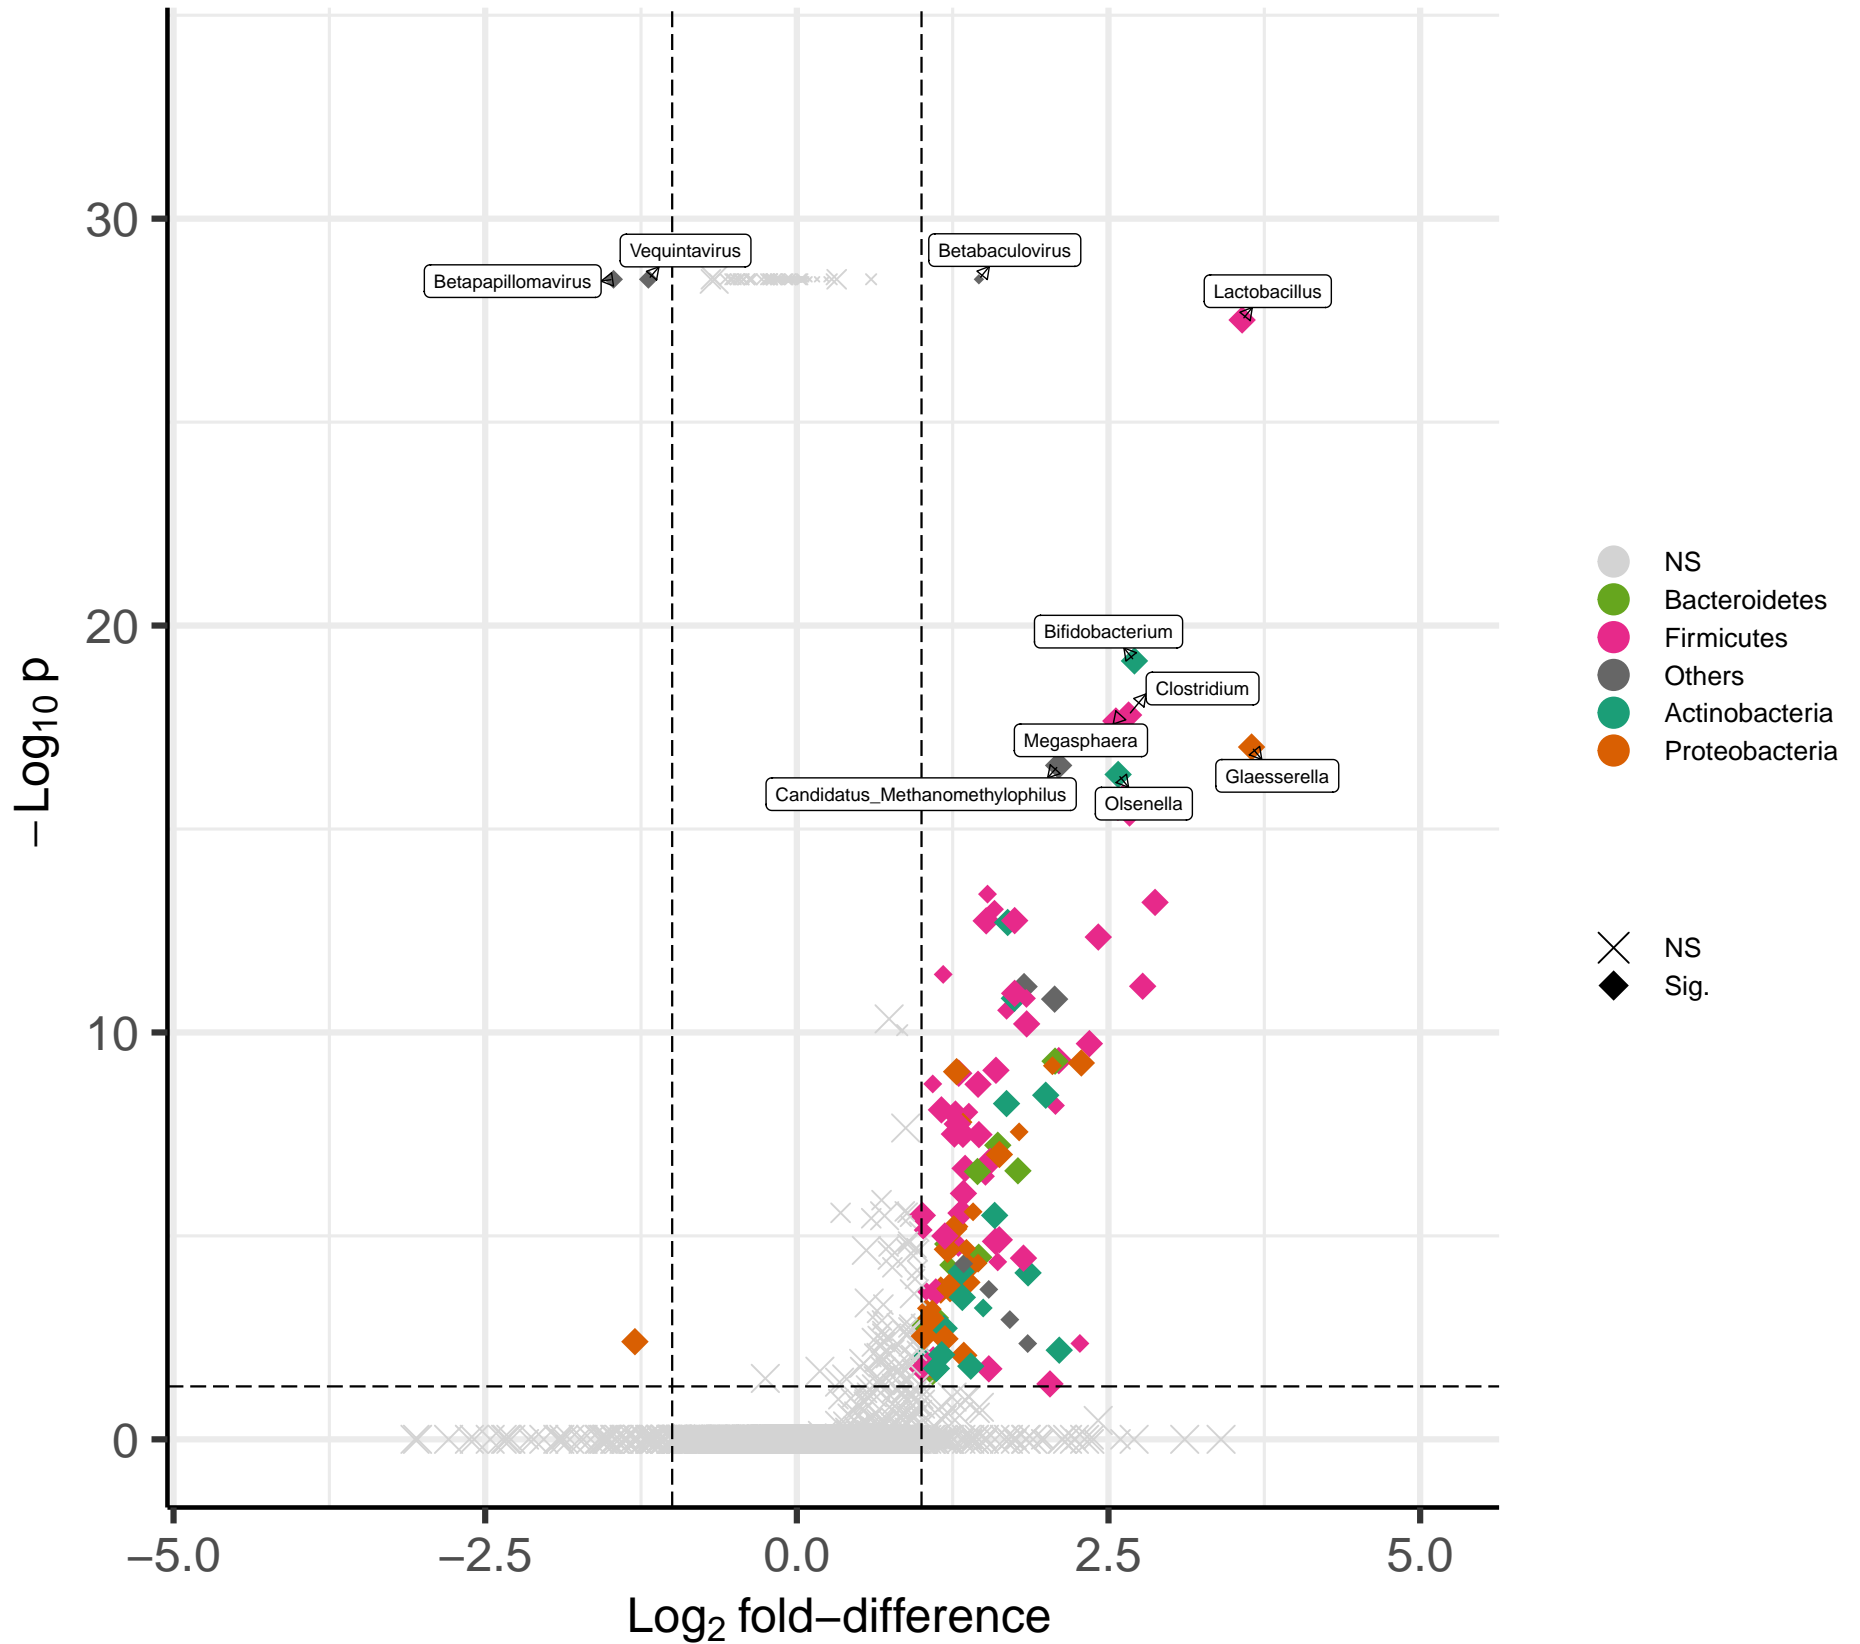

# Working with poultry (vs. no poultry)

15 Sig. DA taxa

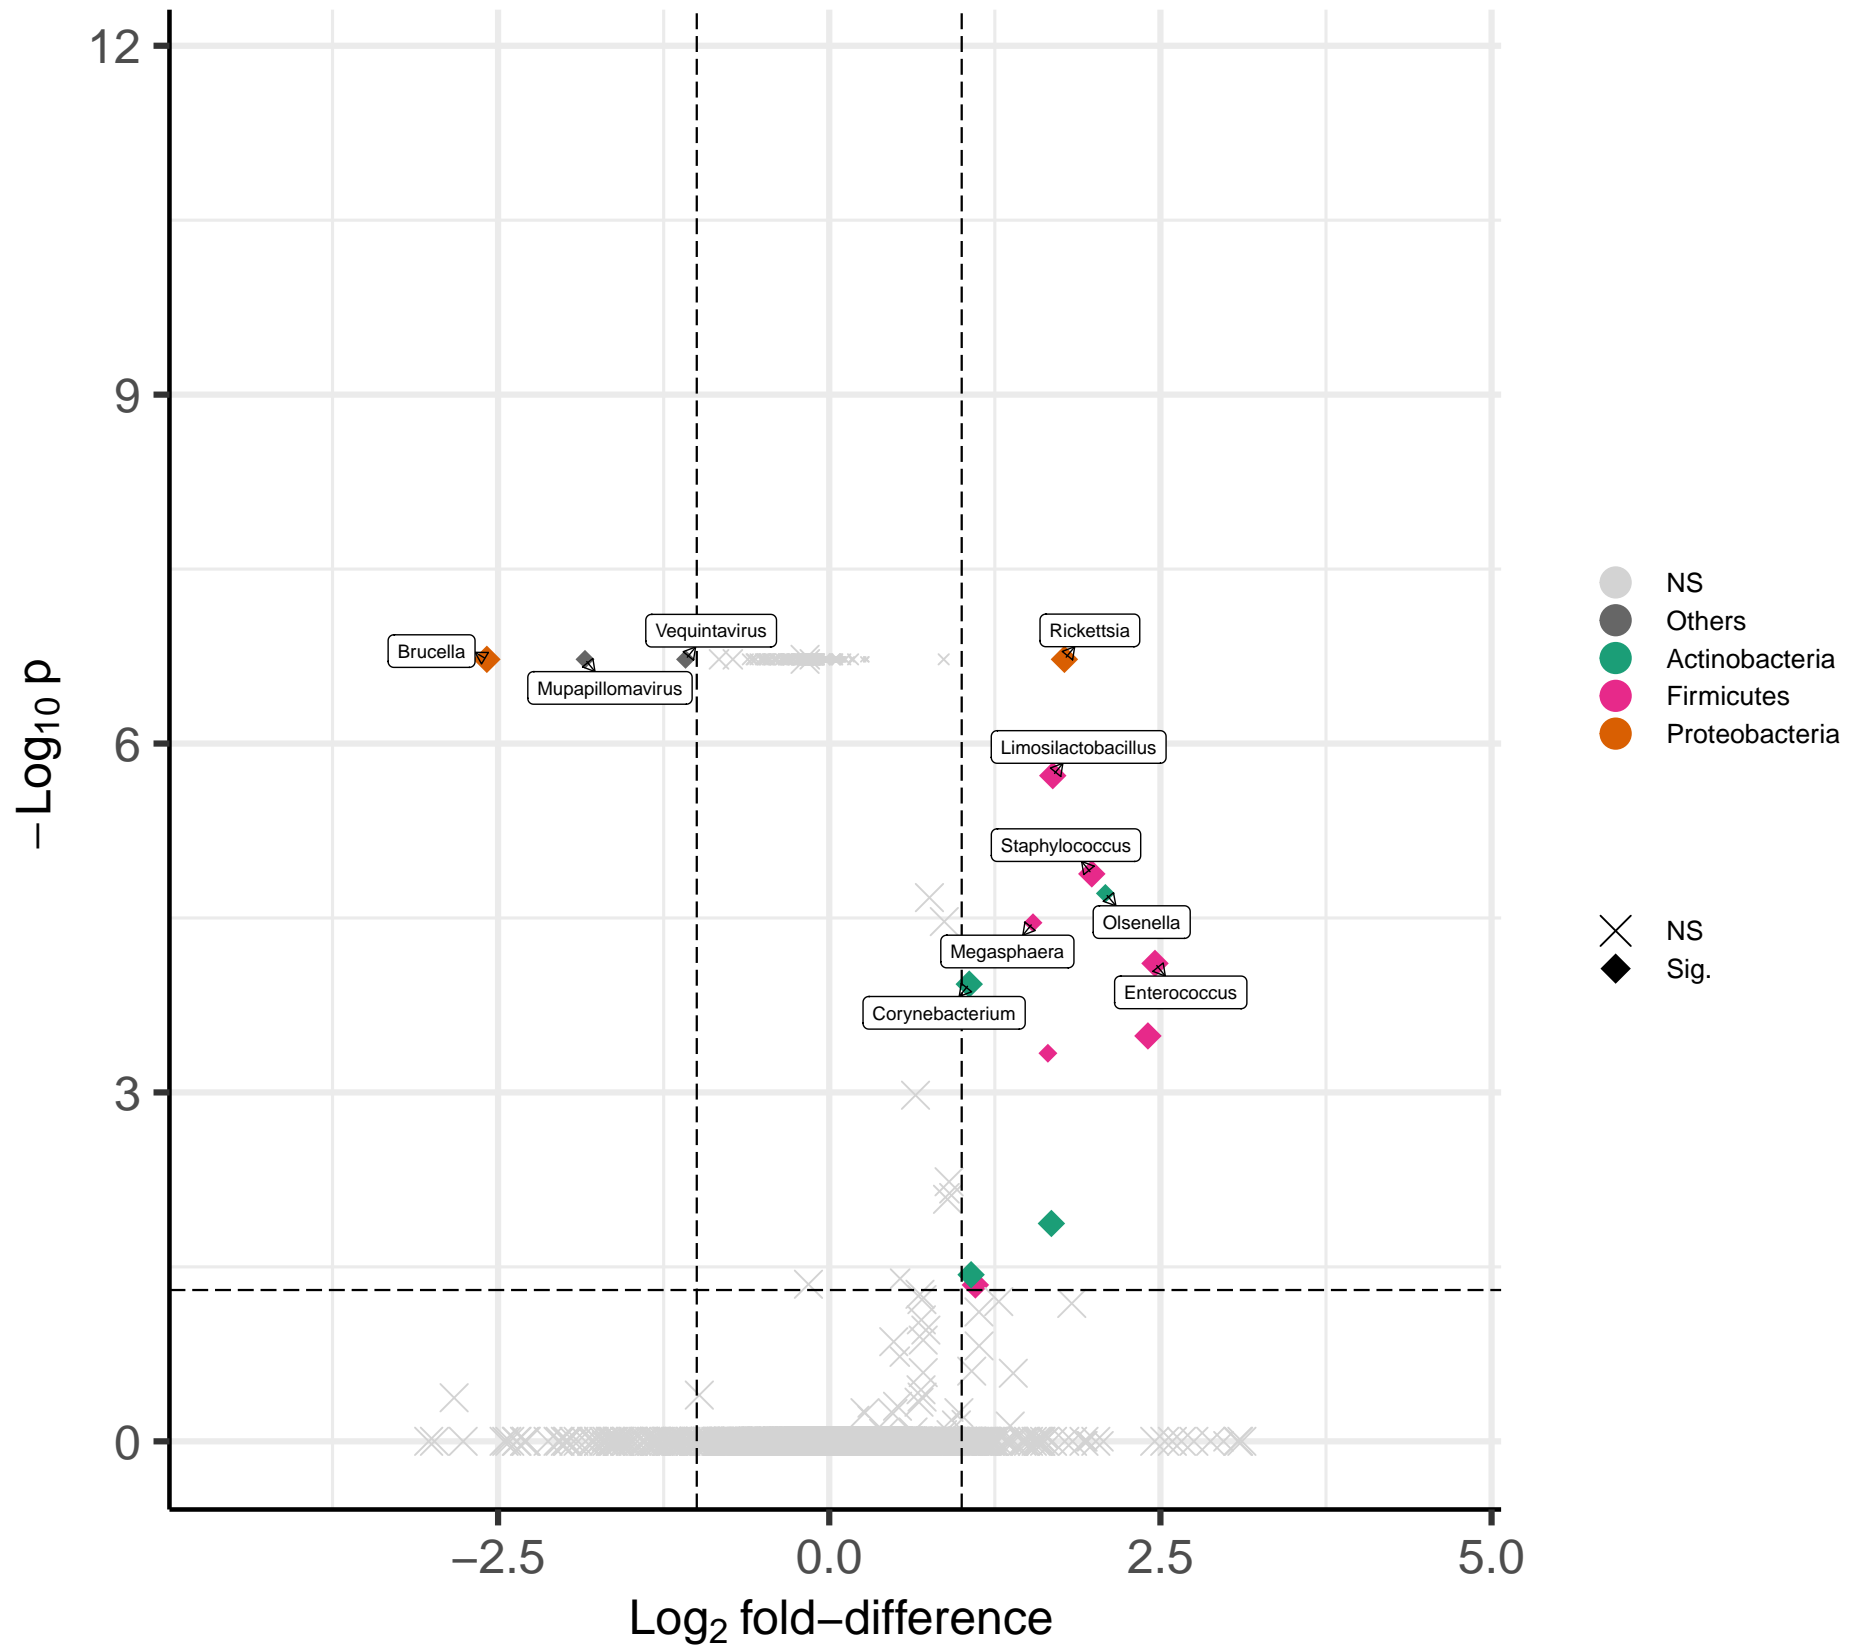

# Spring (vs. other seasons combined)

1 Sig. DA taxa

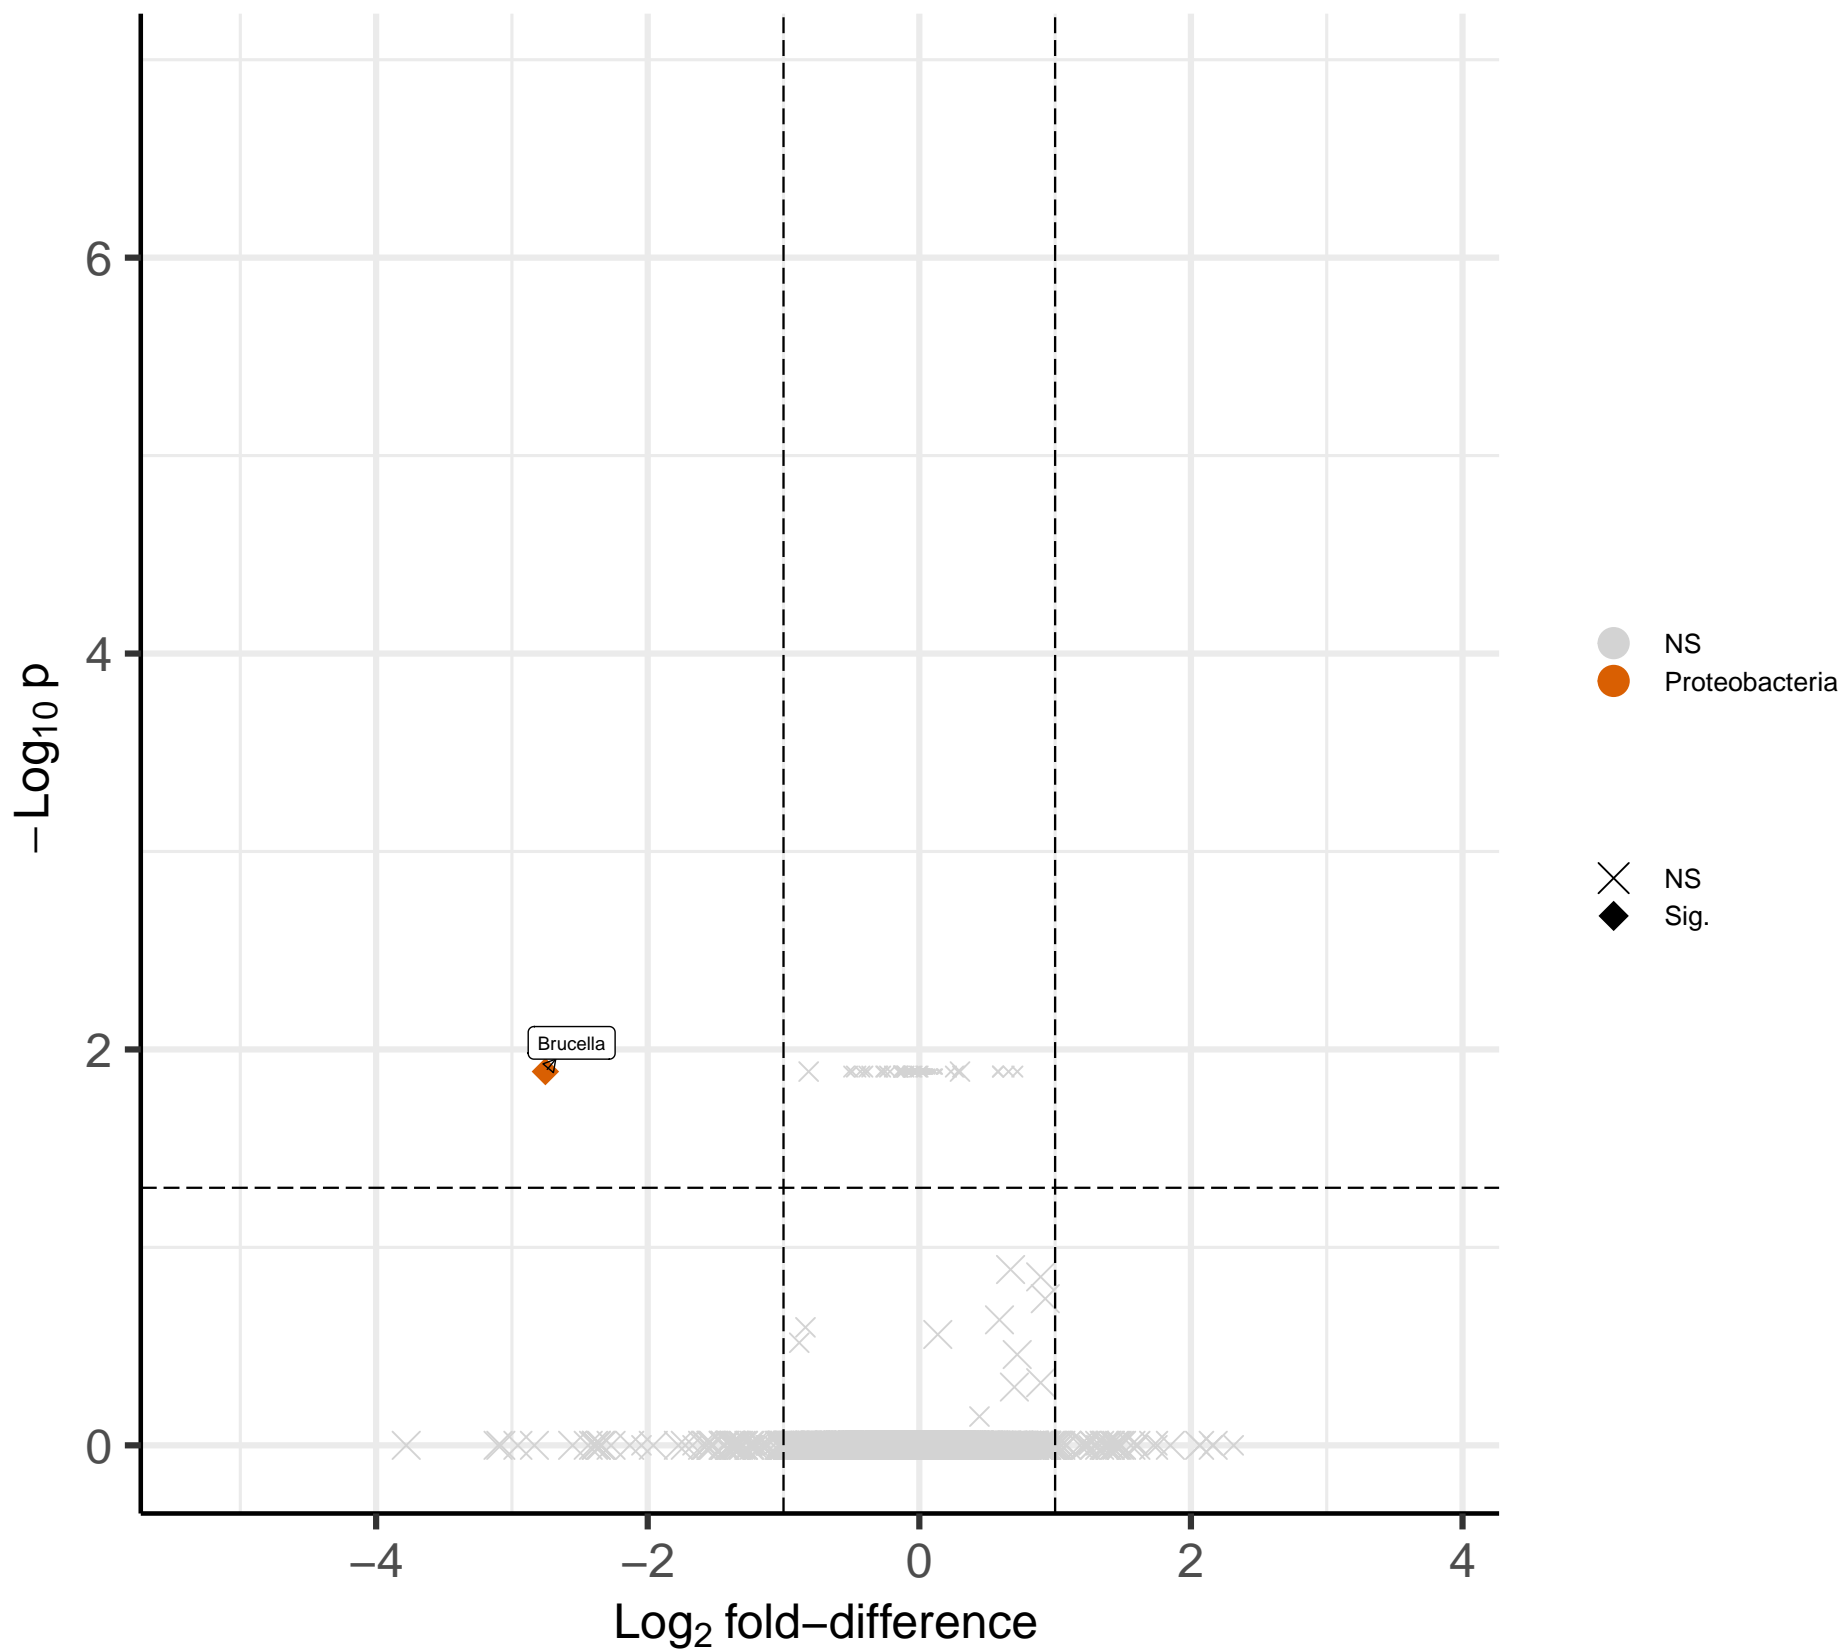

# Summer (vs. other seasons combined)

1 Sig. DA taxa

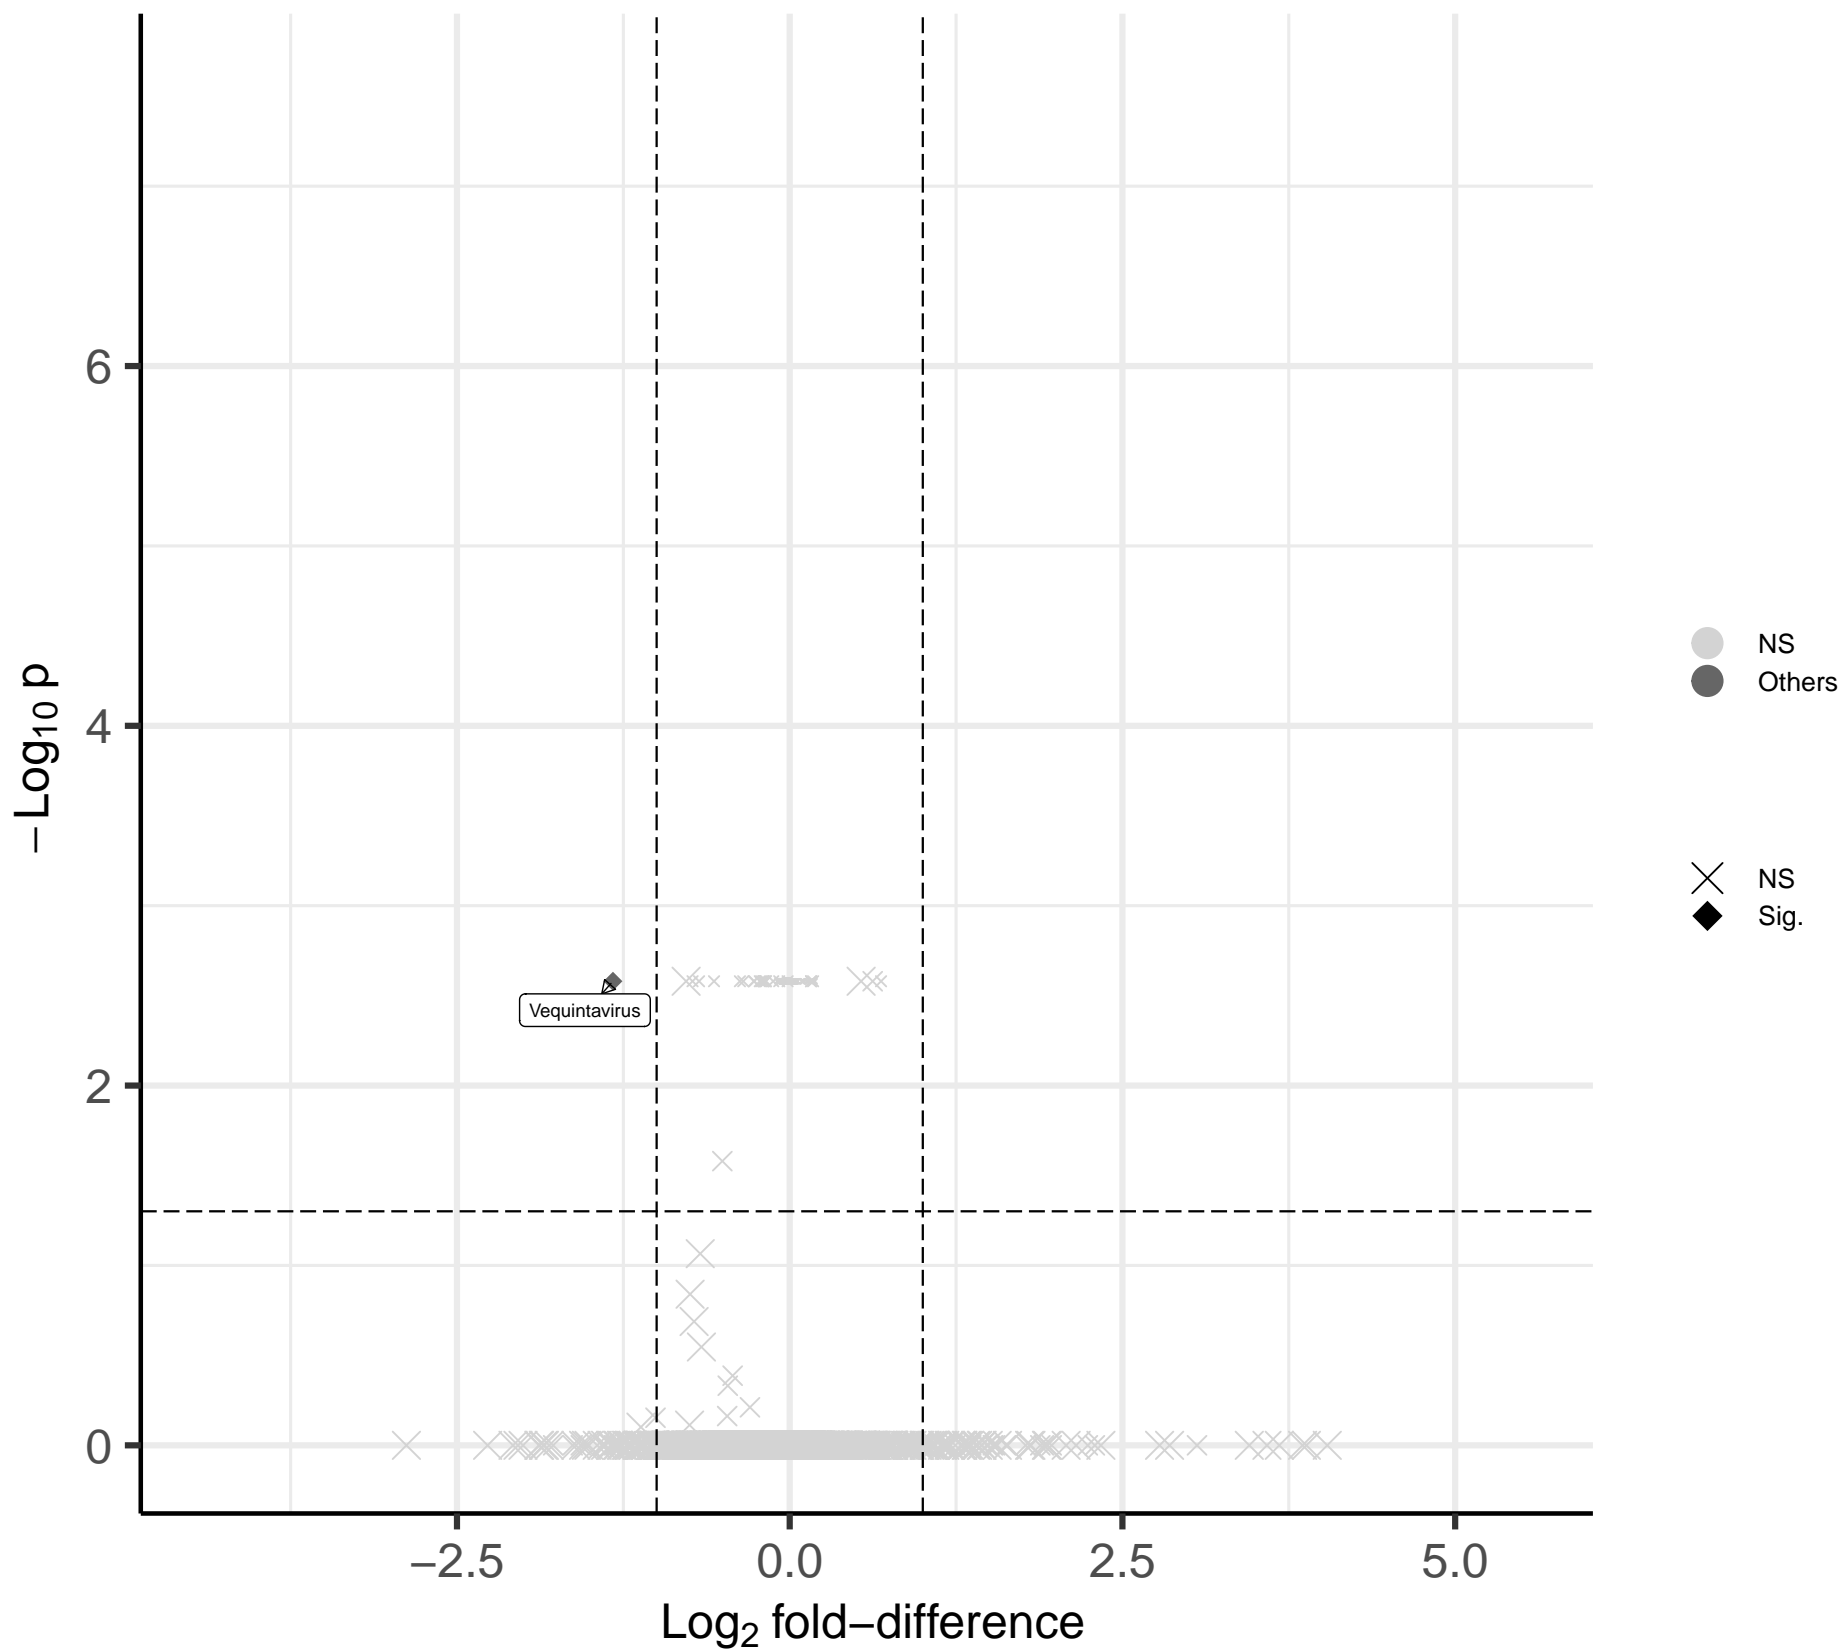

# Fall (vs. other seasons combined)

1 Sig. DA taxa

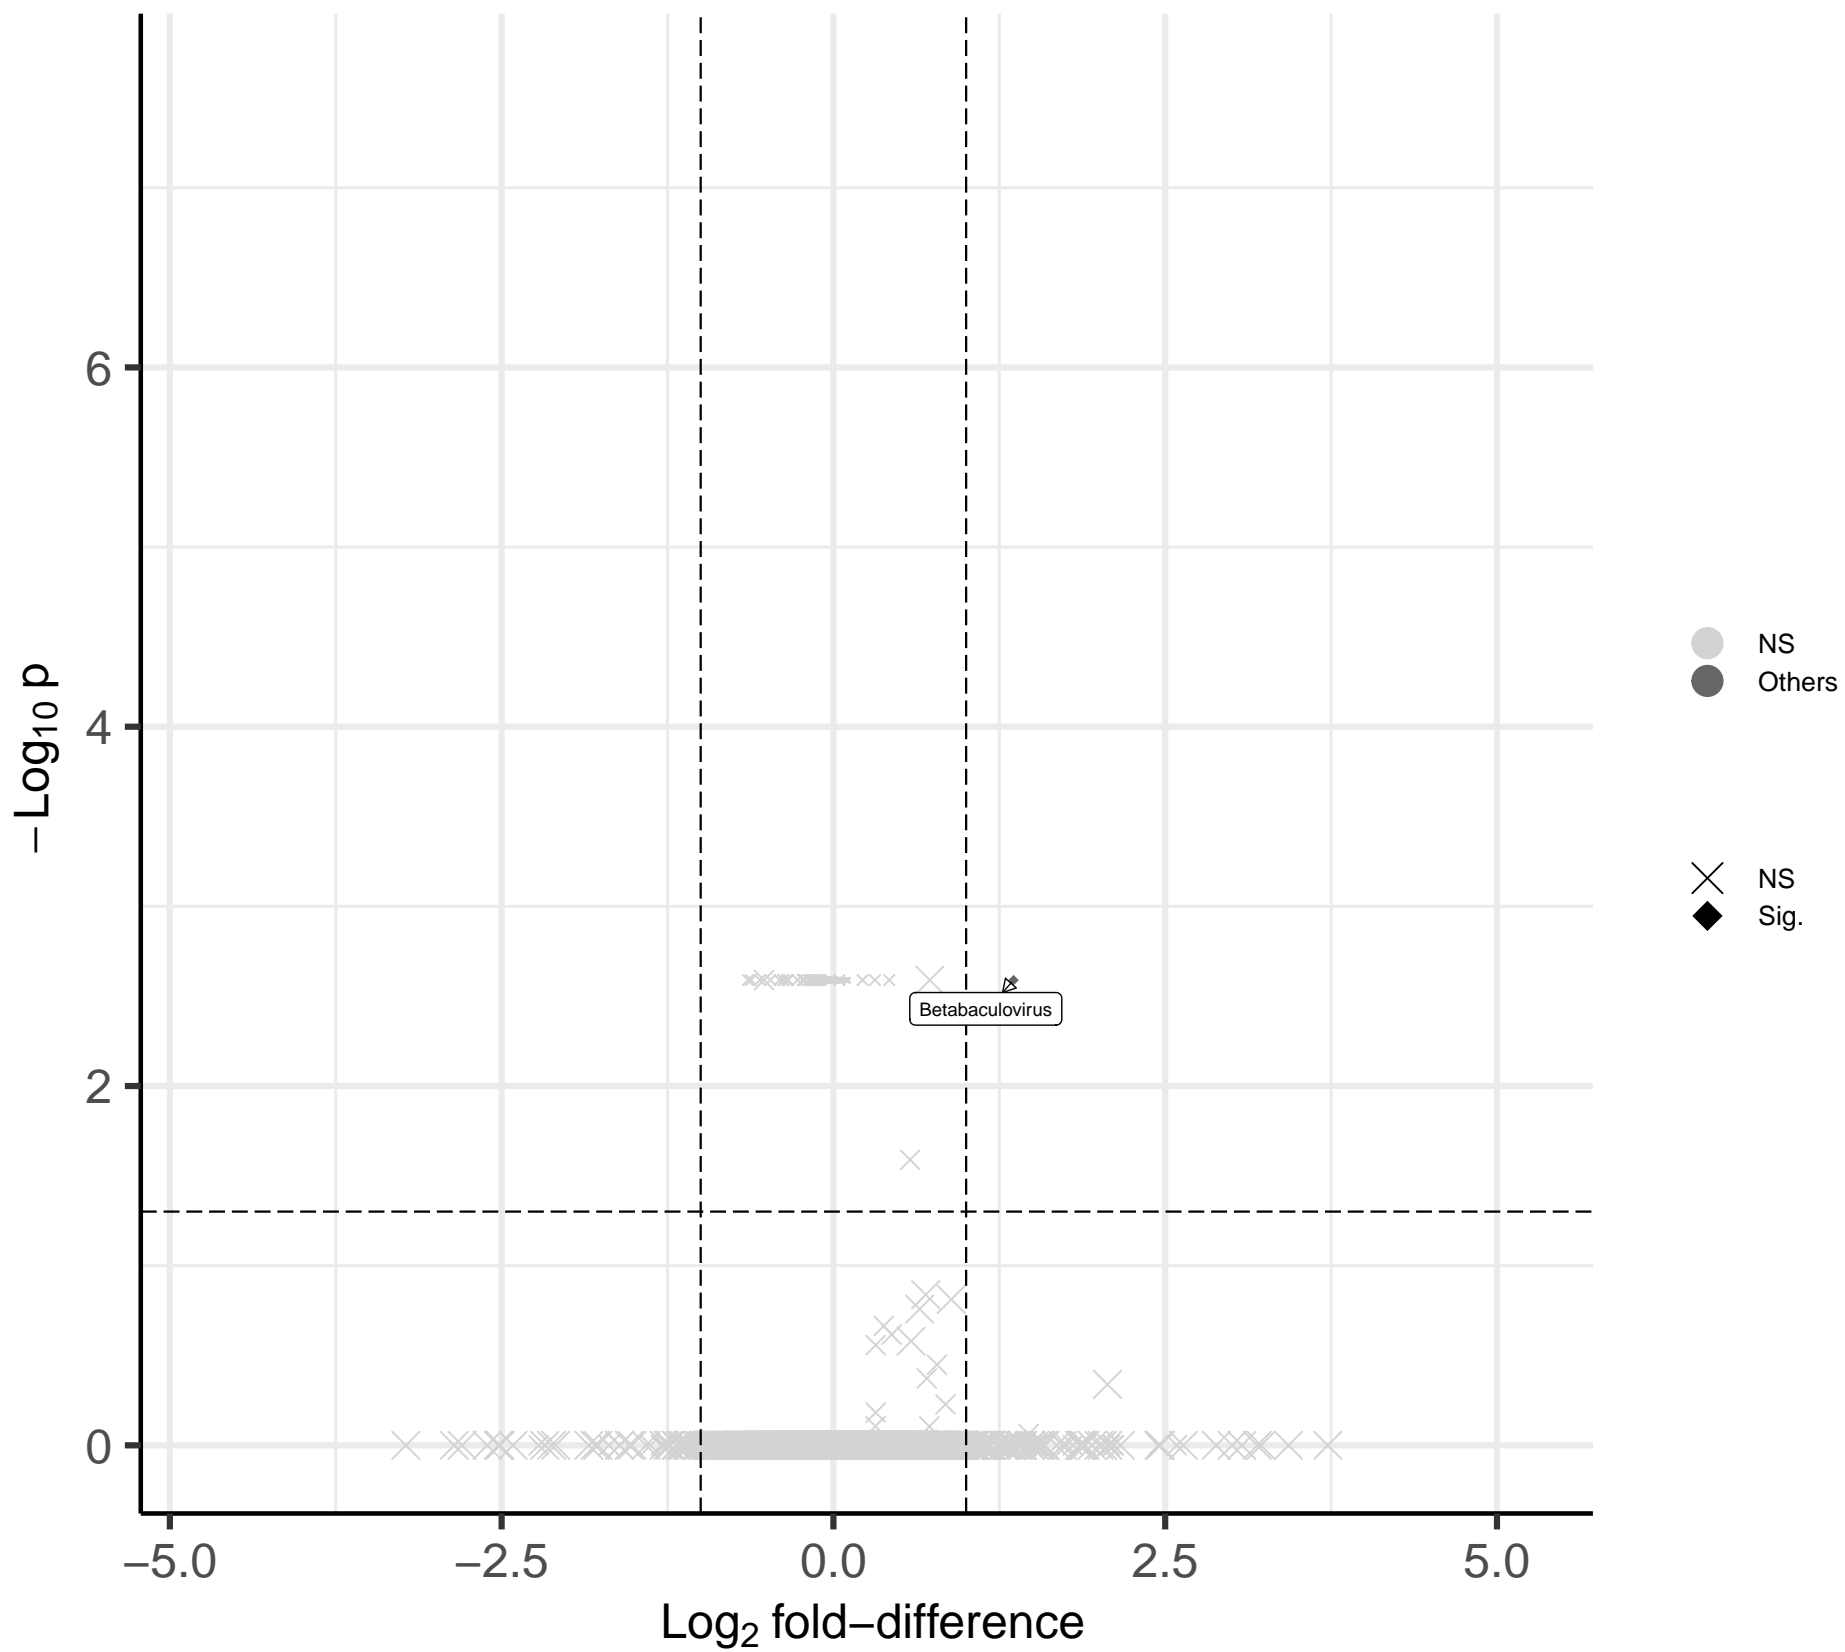



# Winter (vs. other seasons combined)

2 Sig. DA taxa

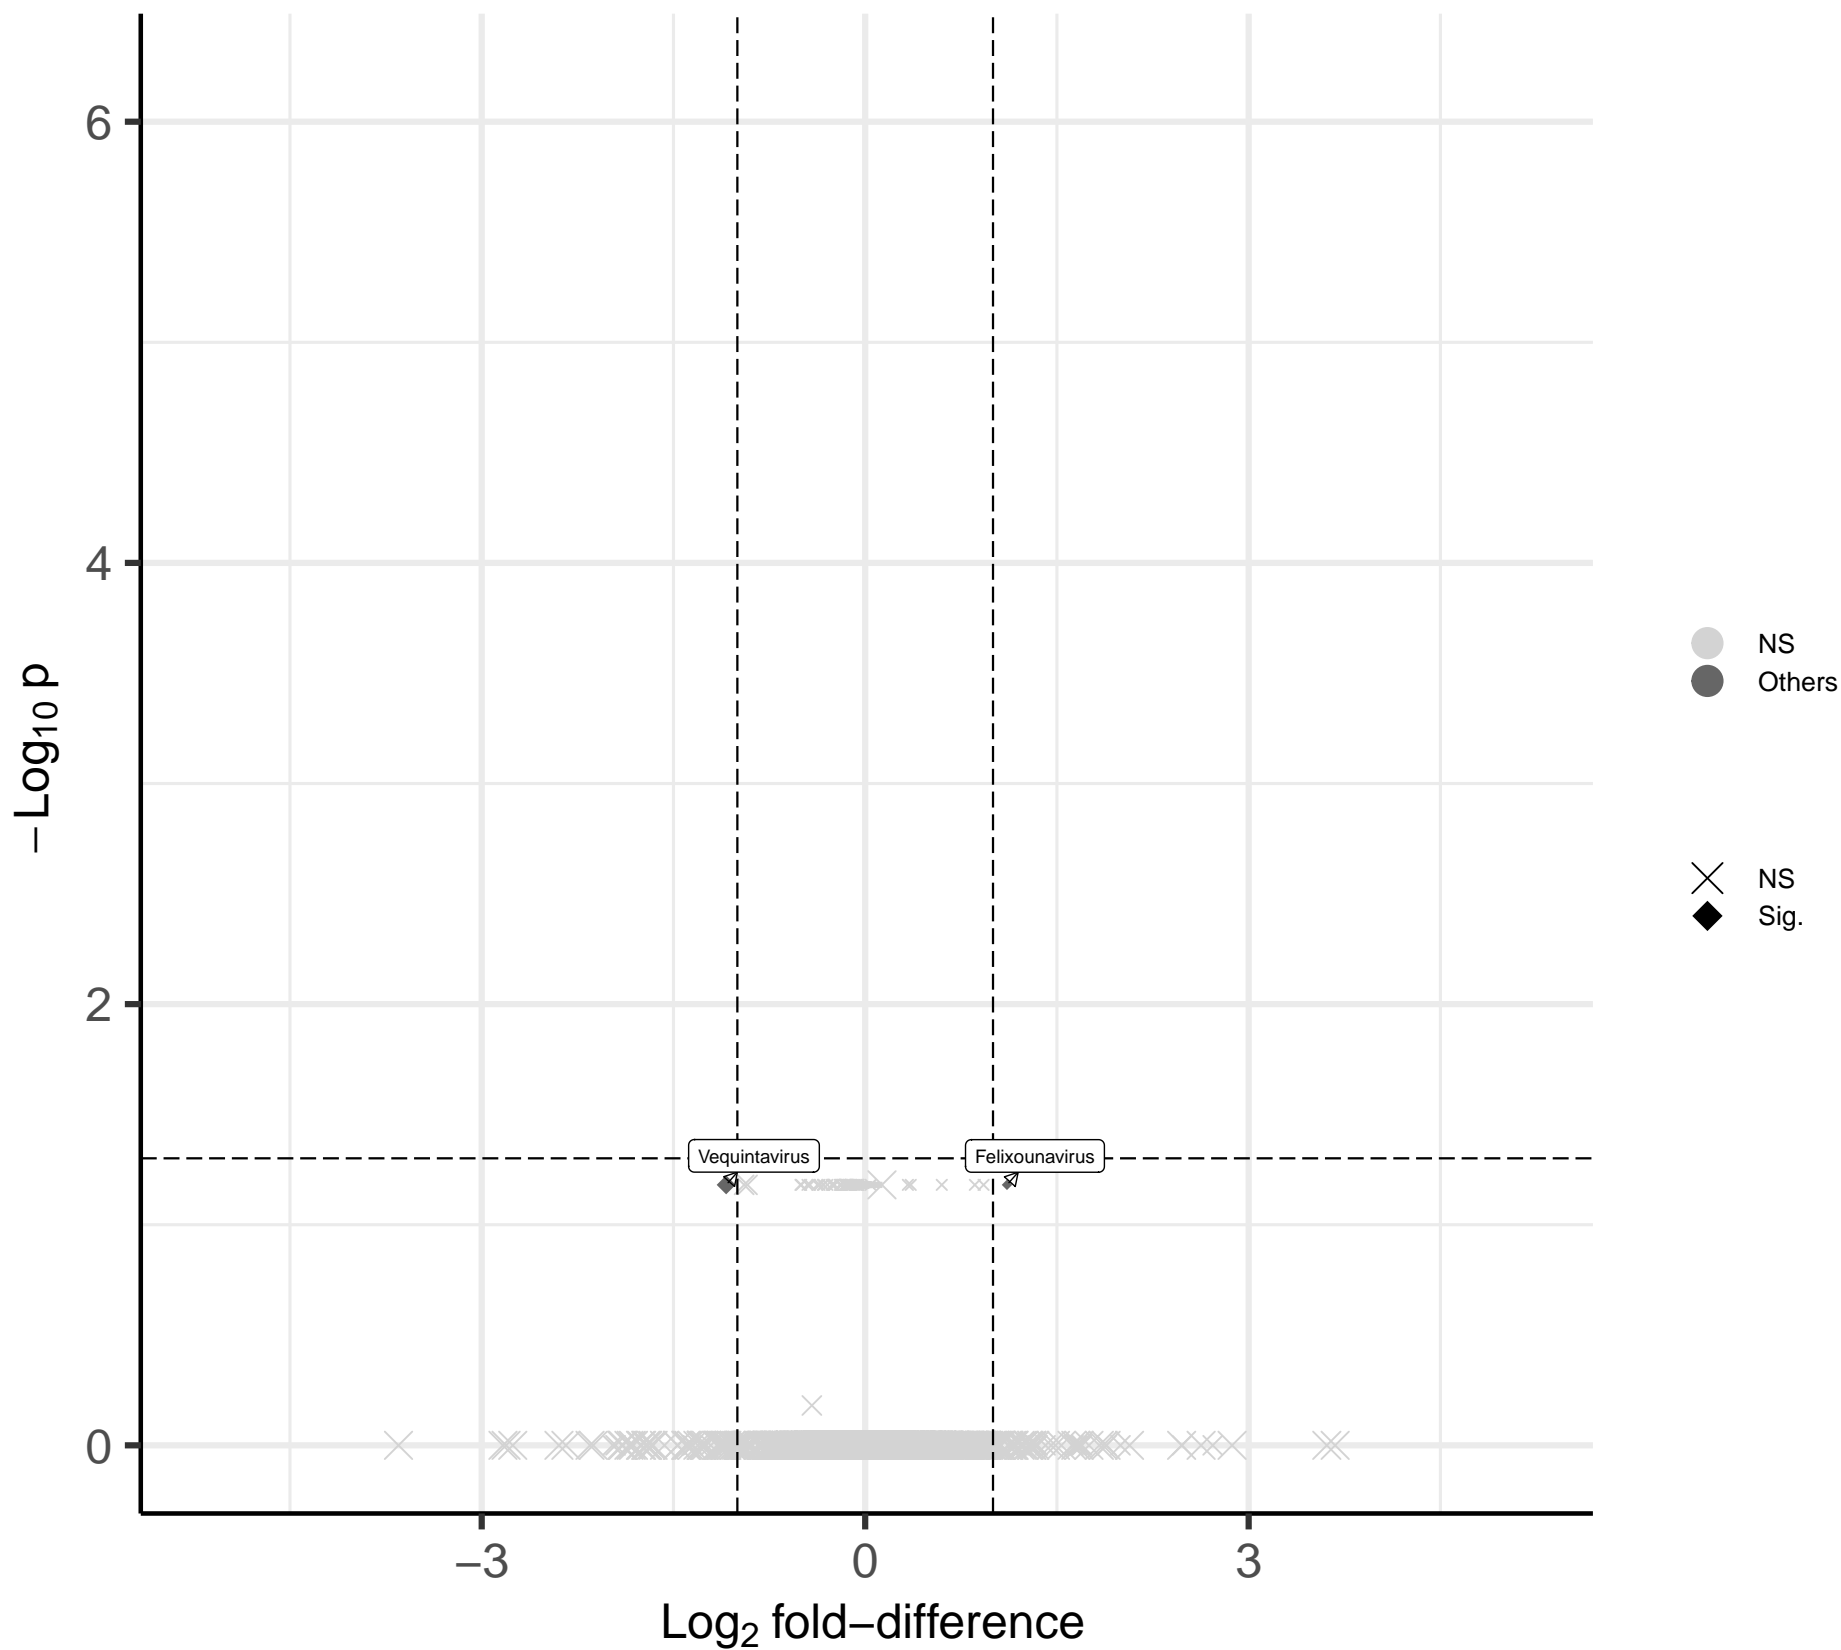

Supplement: Image_7.pdf [file Image_7.pdf]
