# Supplementary material for: Metagenomics reveals novel microbial signatures of farm exposures in house dust
Source: PubMed Central journal article supplement (PMC10321240; doi:10.3389/fmicb.2023.1202194), 2023-06-21
Supplement: Image_1.pdf [file Image_1.pdf]

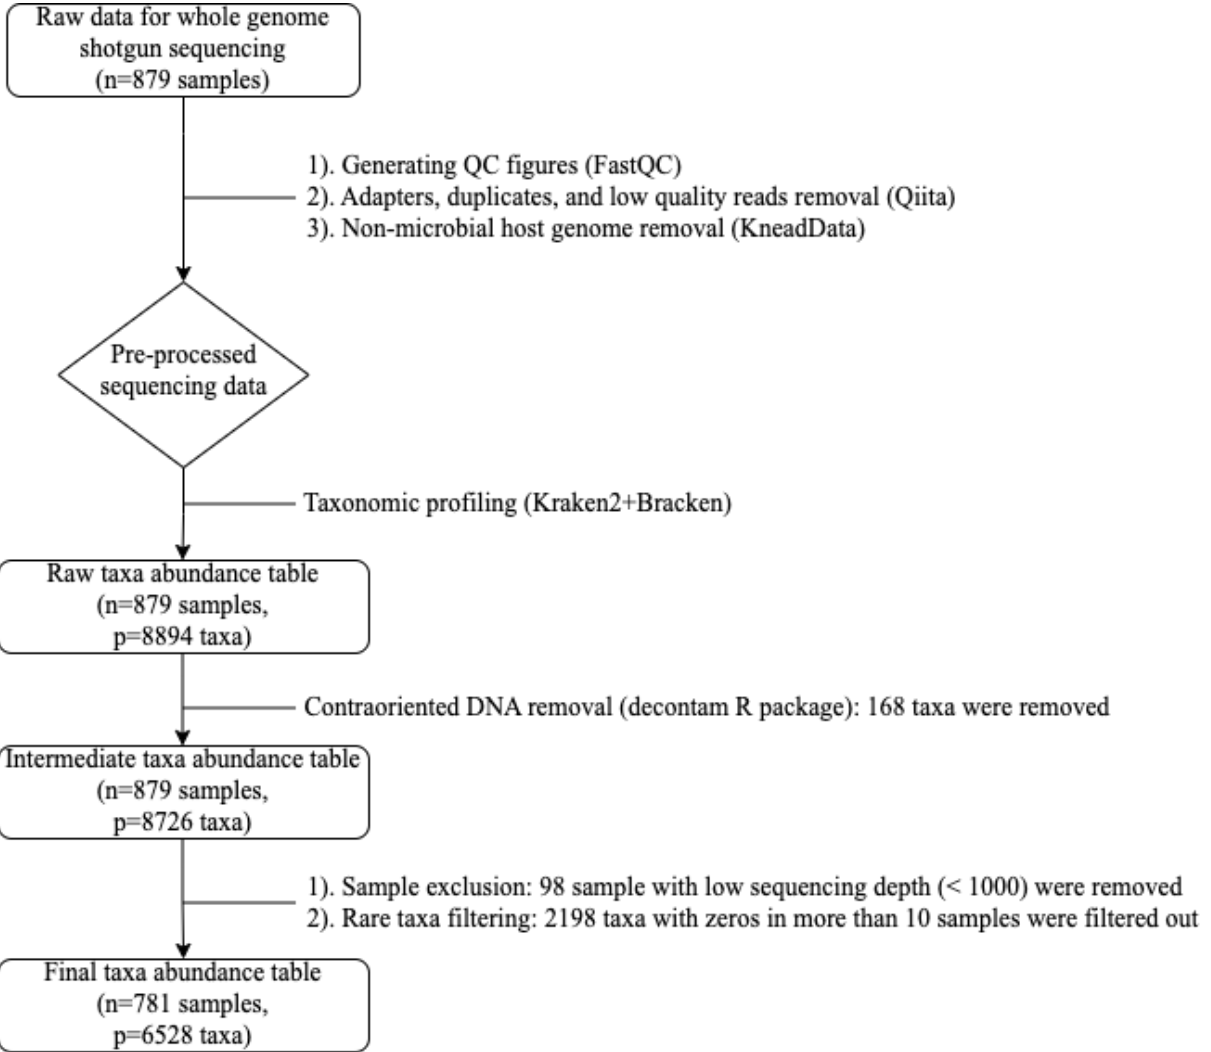

Supplementary Figure S1. Workflow of the Quality Control for WGS.
