# Supplementary material for: Metagenomics reveals novel microbial signatures of farm exposures in house dust
Source: PubMed Central journal article supplement (PMC10321240; doi:10.3389/fmicb.2023.1202194), 2023-06-21
Supplement: Image_2.pdf [file Image_2.pdf]

**A**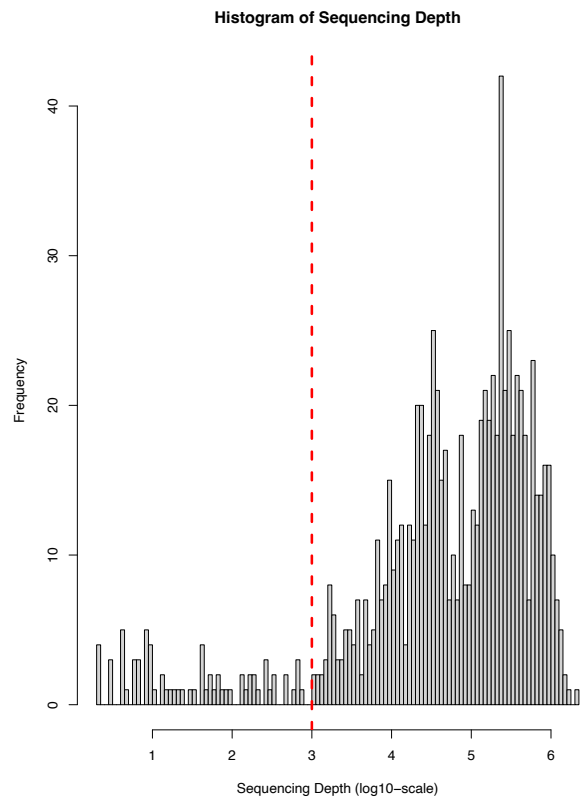**B**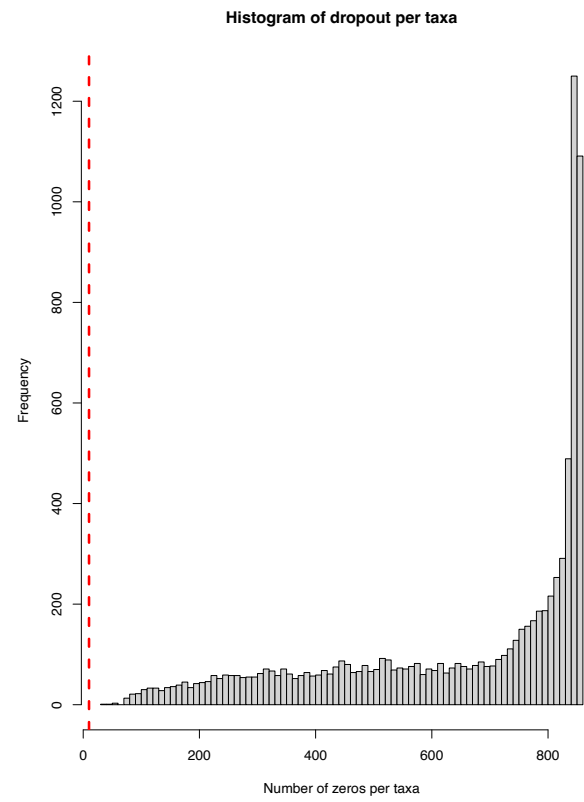

Supplementary Figure S2. Sample and rare taxa filtering criteria for WGS. **(A)**. Histogram of sequencing depth. **(B)**. Histogram of number of zeros per taxon. Red dotted lines indicate the threshold.
