# Supplementary material for: Metagenomics reveals novel microbial signatures of farm exposures in house dust
Source: PubMed Central journal article supplement (PMC10321240; doi:10.3389/fmicb.2023.1202194), 2023-06-21
Supplement: Image_4.pdf [file Image_4.pdf]

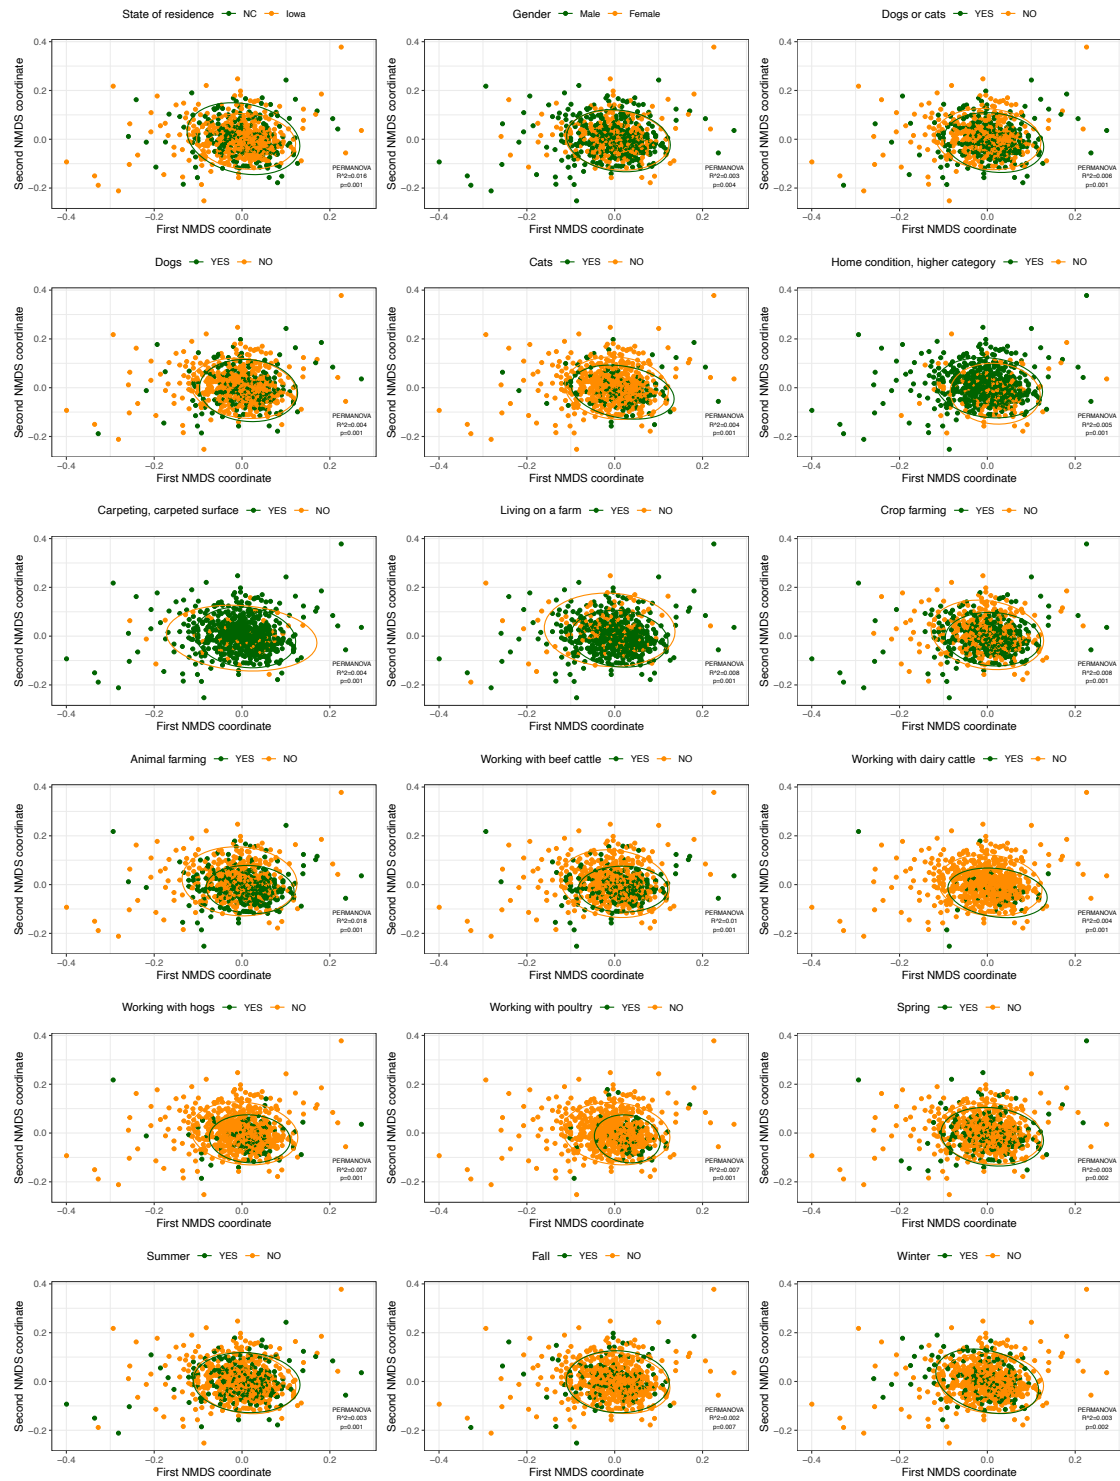

Supplementary Figure S4. Non-metric multidimensional scaling (NMDS) analysis based on weighted UniFrac distances for all exposures. The dust microbial community of each sample is indicated with one dot. R<sup>2</sup> value (percentage of variance explained by exposure) and p-value from the PERMANOVA analysis are reported.
